# Supplementary material for: Isolation and Cytotoxic Activity of Phyllocladanes from the Roots of Acacia schaffneri (Leguminosae)
Source: PubMed Central journal article supplement (PMC7504352; doi:10.3390/molecules25173944), 2020-08-28
Supplement: molecules-25-03944-s001.pdf [file molecules-25-03944-s001.pdf]

# Isolation and Cytotoxic Activity of Phyllocladanes from the Roots of *Acacia schaffneri* (Leguminosae)

José de Jesús Manríquez-Torres <sup>1,\*</sup>, Marco Antonio Hernández-Lepe <sup>1</sup>,  
José Román Chávez-Méndez <sup>1</sup>, Susana González-Reyes <sup>1</sup>, Idanya Rubí Serafin-Higuera <sup>1</sup>,  
Genaro Rodríguez-Uribe <sup>1</sup> and Jesús Martín Torres-Valencia <sup>2</sup>

<sup>1</sup> Medical and Psychology School, Autonomous University of Baja California, Universidad 14418, Parque Internacional Industrial Tijuana, 22390 Tijuana, B.C. México; marco.antonio.hernandez.lepe@uabc.edu.mx (M.A.H.-L.); roman.chavez@uabc.edu.mx (J.R.C.-M.); susana.gonzalez.reyes@uabc.edu.mx (S.G.-R.); serafin.idanya@uabc.edu.mx (I.R.S.-H.); genaro.rodriguez@uabc.edu.mx (G.R.-U.)

<sup>2</sup> Department of Chemistry, Autonomous University of Hidalgo, Km 4.5 Carretera Pachuca-Tulancingo, 42184 Mineral de la Reforma, Hidalgo, México; jmartin@uaeh.edu.mx

\* Correspondence: jose.de.jesus.manriquez.torres@uabc.edu.mx; Tel.: +52-664-682-1233

## Supplementary data

Figure S1:  $^1\text{H}$ -NMR spectrum of phyllocladan-16 $\alpha$ ,19-diol (**1**)

Figure S2:  $^{13}\text{C}$ -NMR spectrum of phyllocladan-16 $\alpha$ ,19-diol (**1**)

Figure S3: APT experiment spectrum of phyllocladan-16 $\alpha$ ,19-diol (**1**)

Figure S4:  $^1\text{H}$ - $^1\text{H}$  COSY spectrum of phyllocladan-16 $\alpha$ ,19-diol (**1**)

Figure S5: HSQC spectrum of phyllocladan-16 $\alpha$ ,19-diol (**1**)

Figure S6: HSQC spectrum of phyllocladan-16 $\alpha$ ,19-diol (**1**)

Figure S7:  $^1\text{H}$ -NMR spectrum of phyllocladan-16 $\alpha$ -ol (**2**)

Figure S8: APT experiment spectrum of phyllocladan-16 $\alpha$ -ol (**2**)

Figure S9:  $^1\text{H}$ - $^1\text{H}$  COSY spectrum of phyllocladan-16 $\alpha$ -ol (**2**)

Figure S10:  $^1\text{H}$ -NMR spectrum of phylloclad-16-en-3-ol (**3**)

Figure S11: APT experiment spectrum of phylloclad-16-en-3-ol (**3**)

Figure S12:  $^1\text{H}$ - $^1\text{H}$  COSY spectrum of phylloclad-16-en-3-ol (**3**)

Figure S14: HSQC spectrum of phylloclad-16-en-3-ol (**3**)

# Compound 1 NMR

PrptonAsM1  
Sesquiterpeno Raiz A s, Jesus

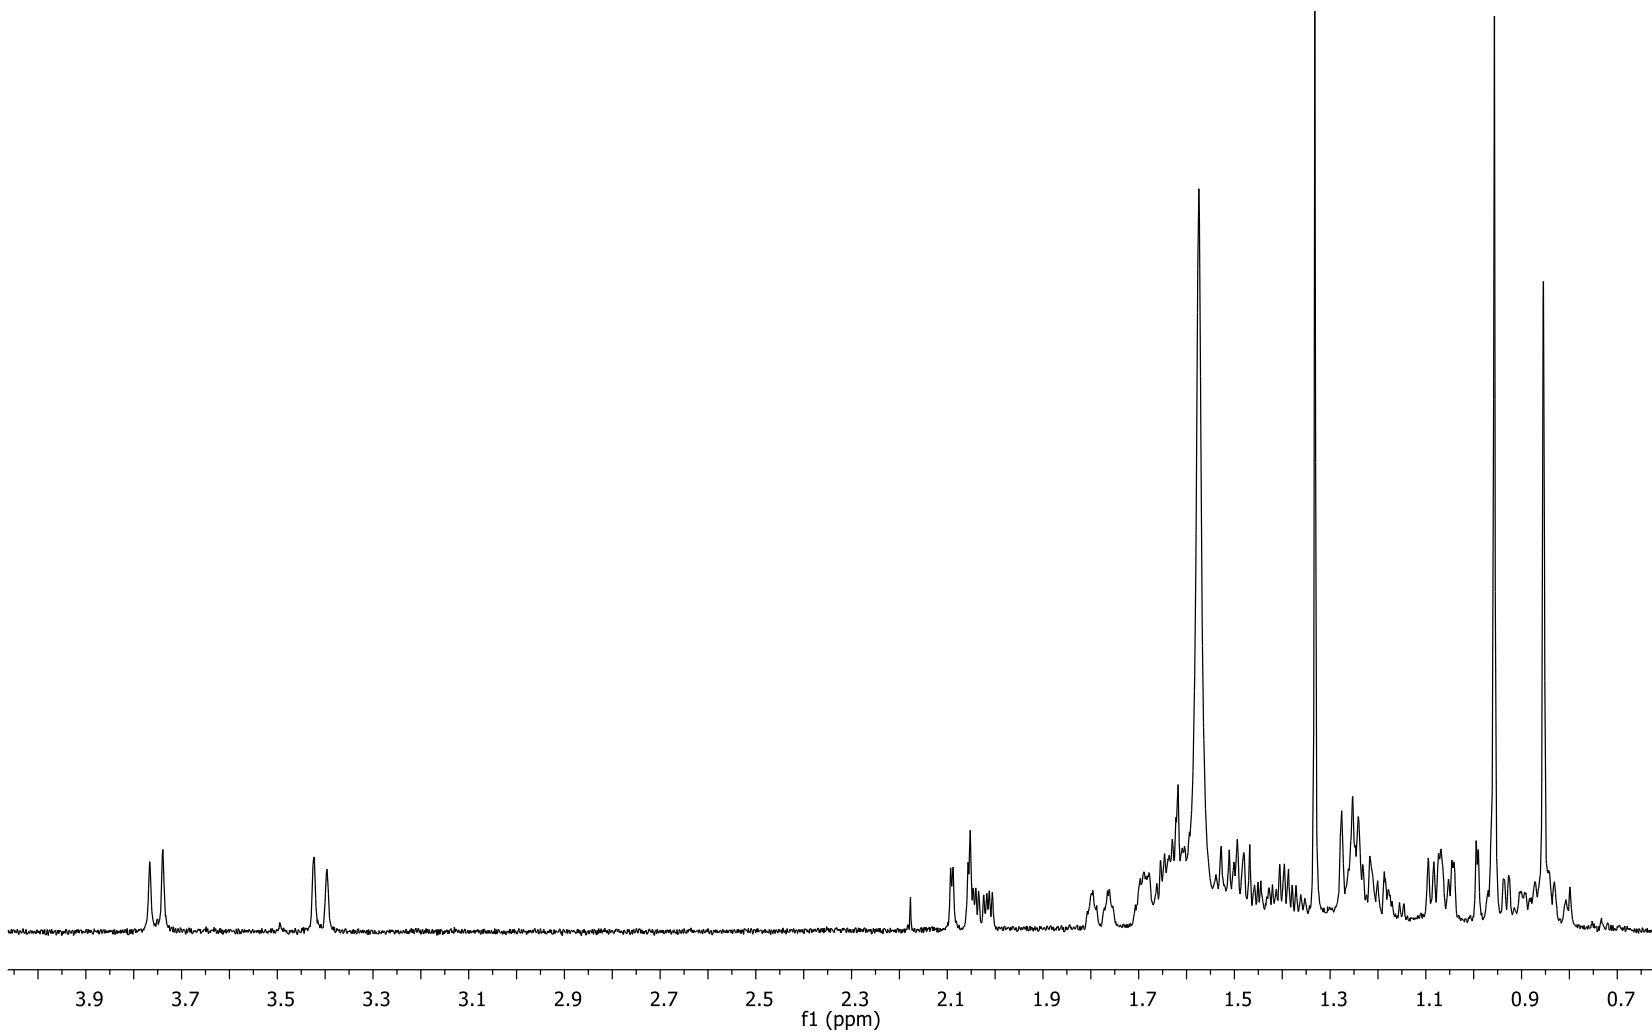

Figure S1: <sup>1</sup>H-NMR spectrum of phyllocladan-16 $\alpha$ ,19-diol (1)

PPRaiz13C18022011

Jesus

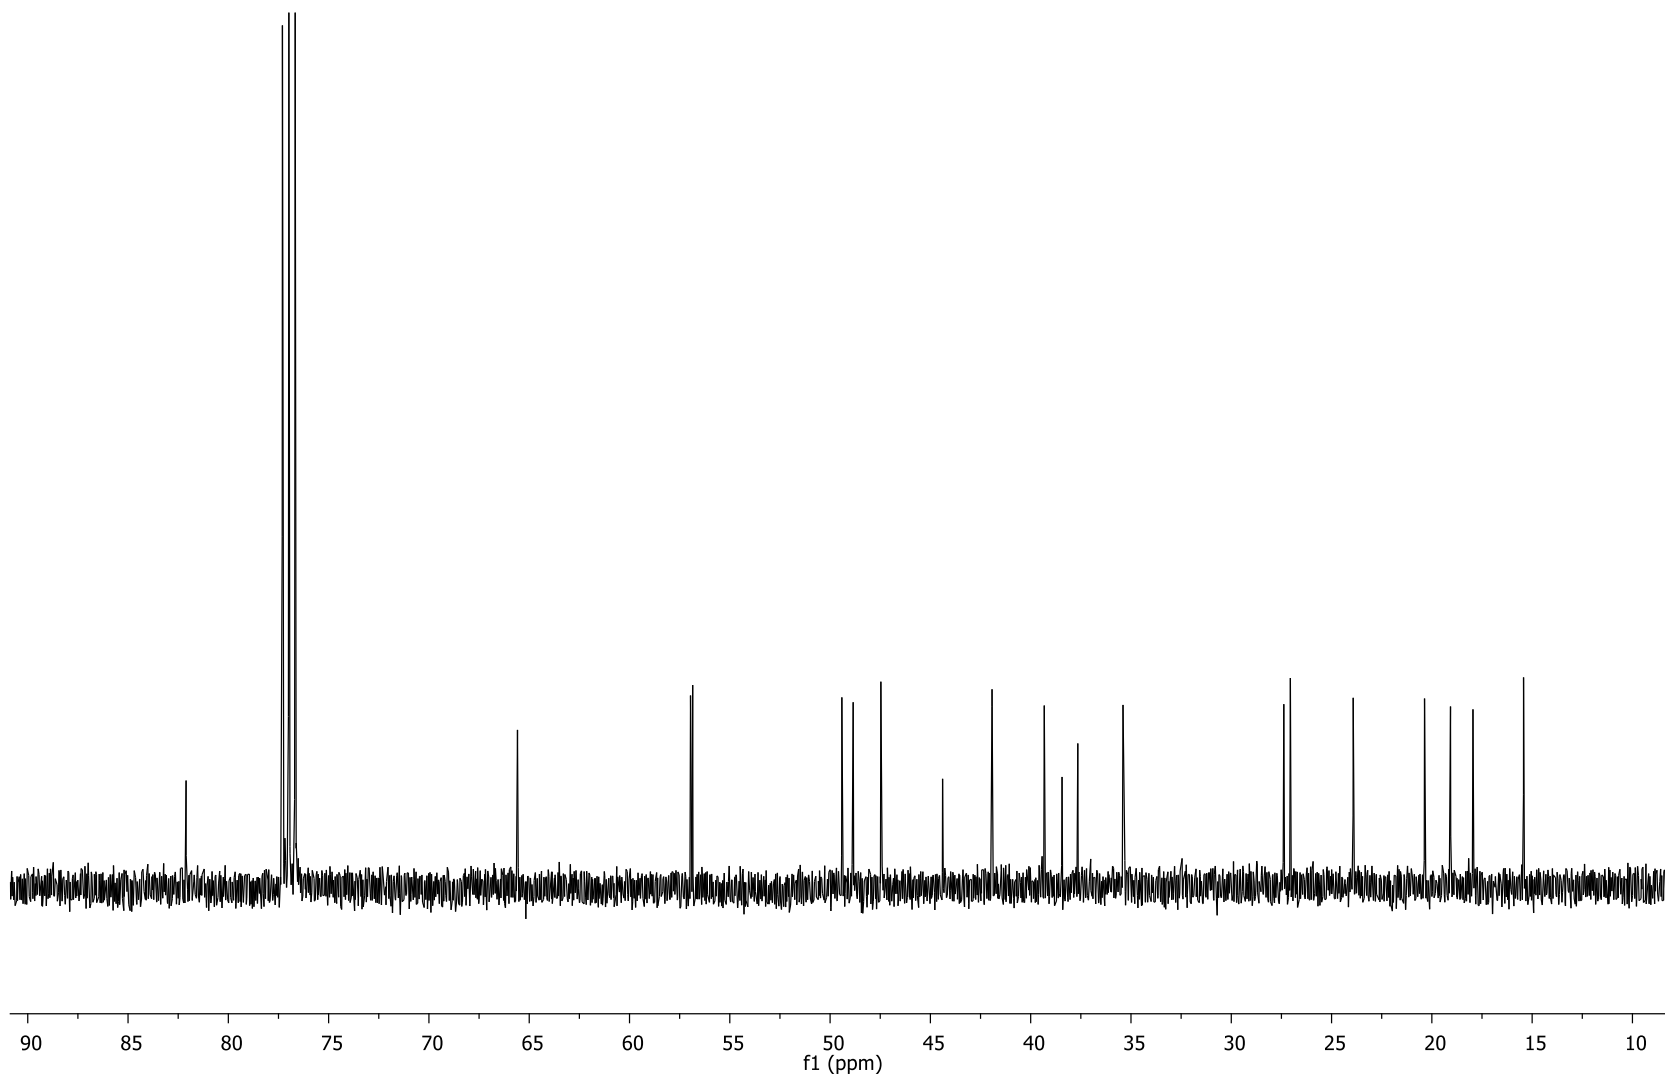

Figure S2: <sup>13</sup>C-NMR spectrum of phyllocladan-16 $\alpha$ ,19-diol (**1**)

PPRaizAPT18022011

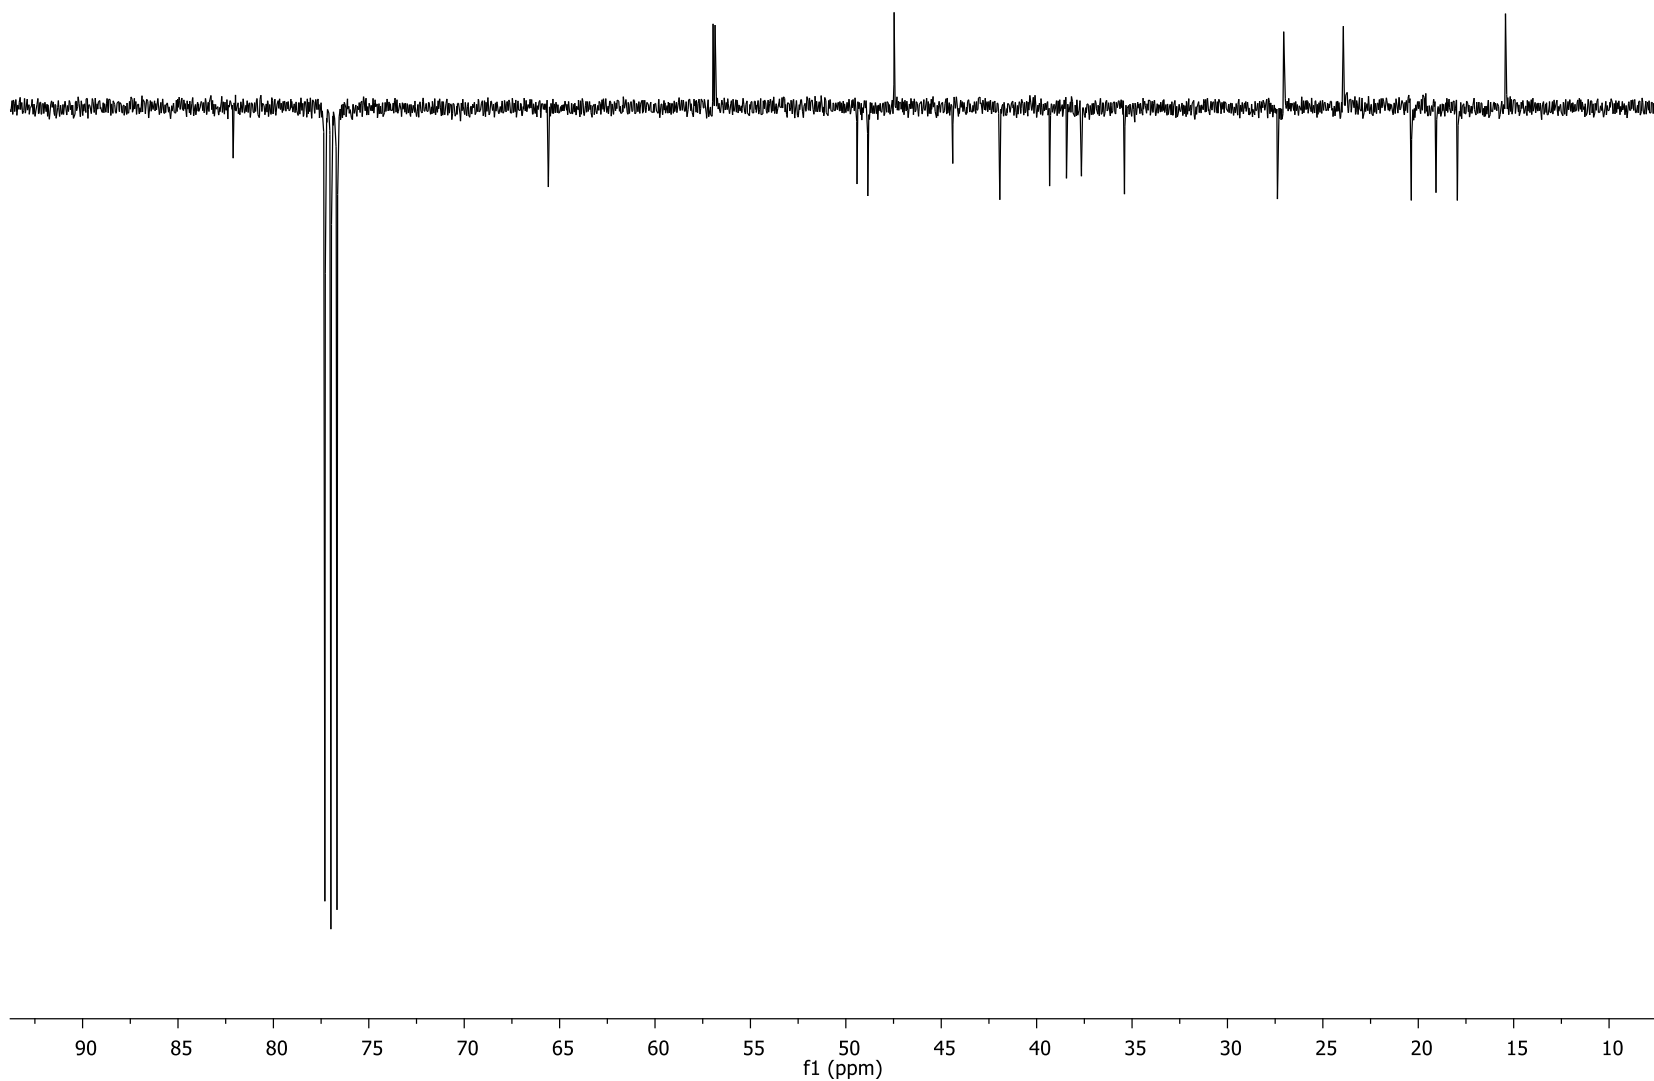

Figure S3: APT experiment spectrum of phyllocladan-16 $\alpha$ ,19-diol (**1**)

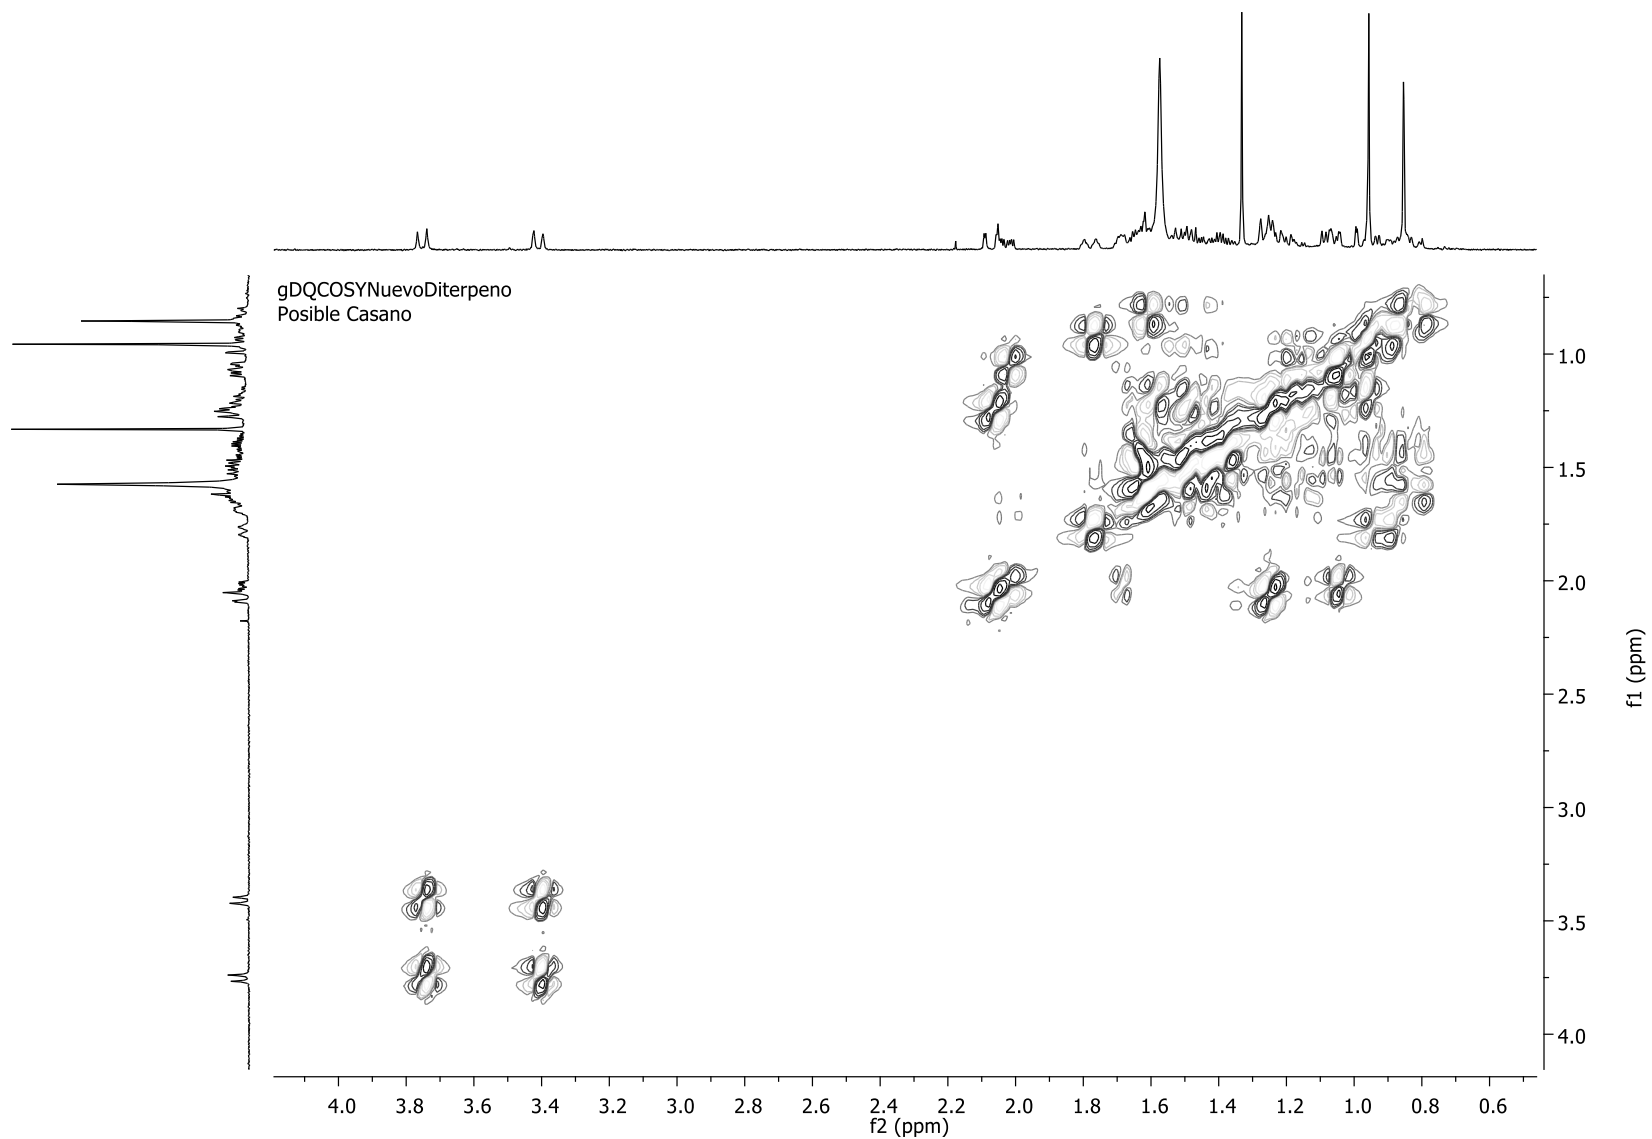

Figure S4:  $^1\text{H}$ - $^1\text{H}$  COSY spectrum of phyllocladan-16 $\alpha$ ,19-diol (**1**)

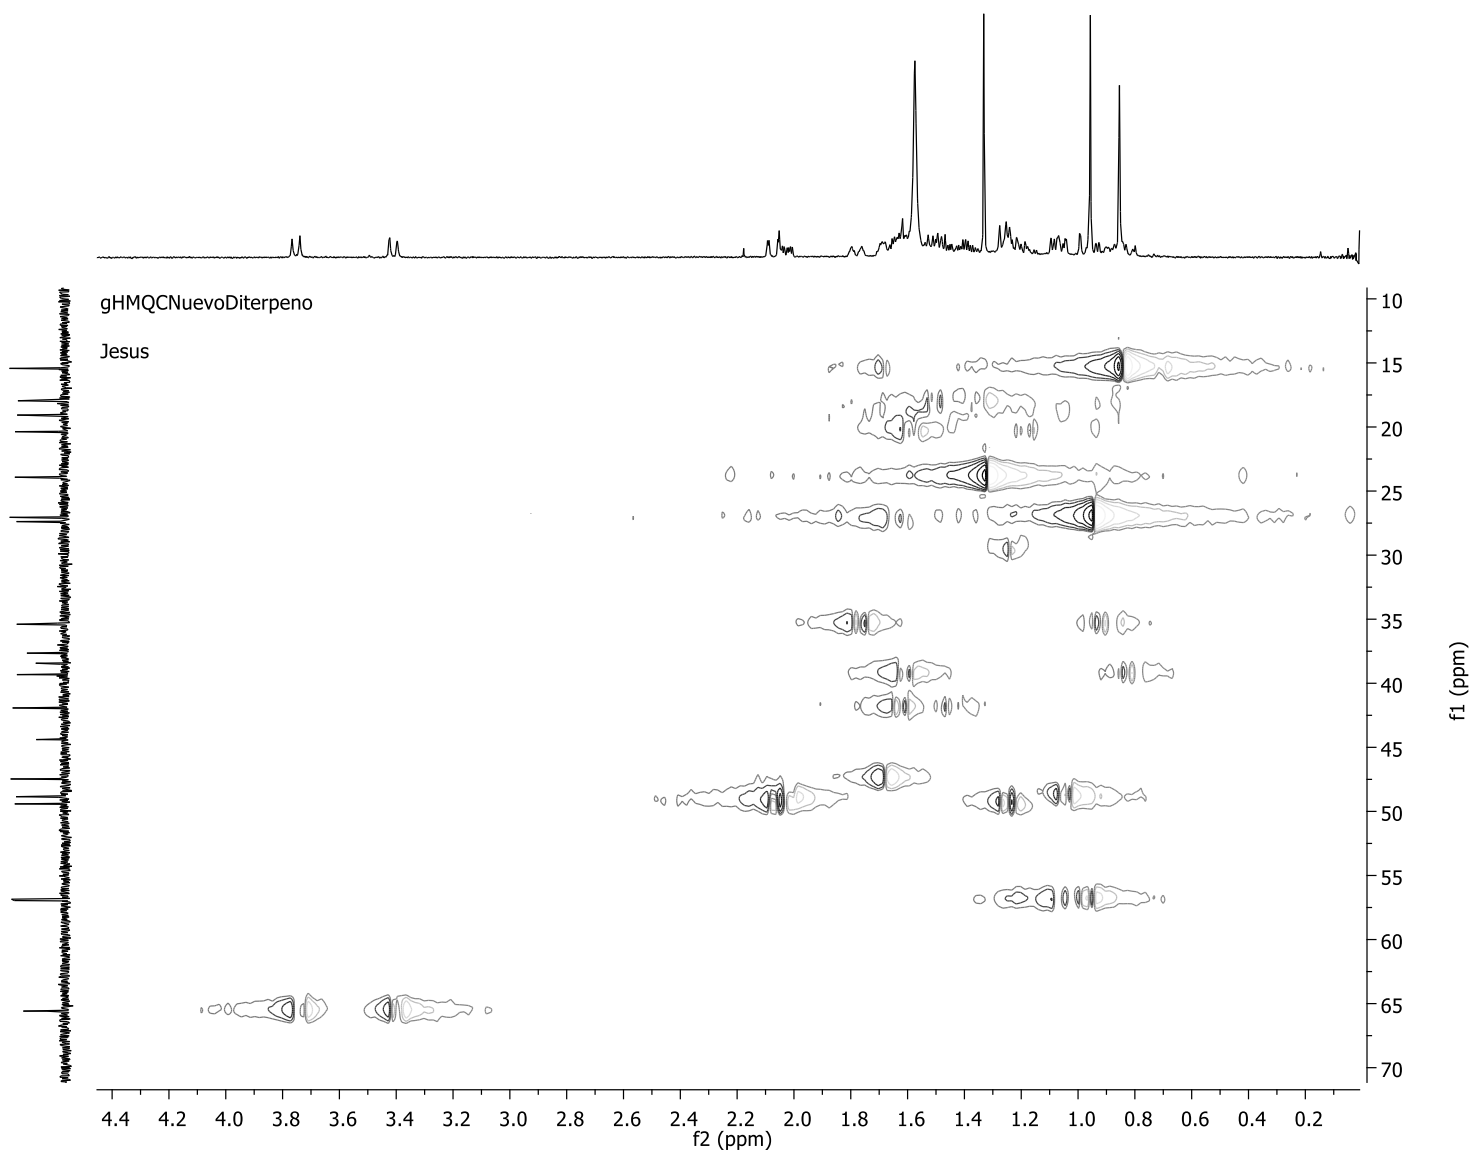

Figure S5: HSQC spectrum of phyllocladan-16 $\alpha$ ,19-diol (1)

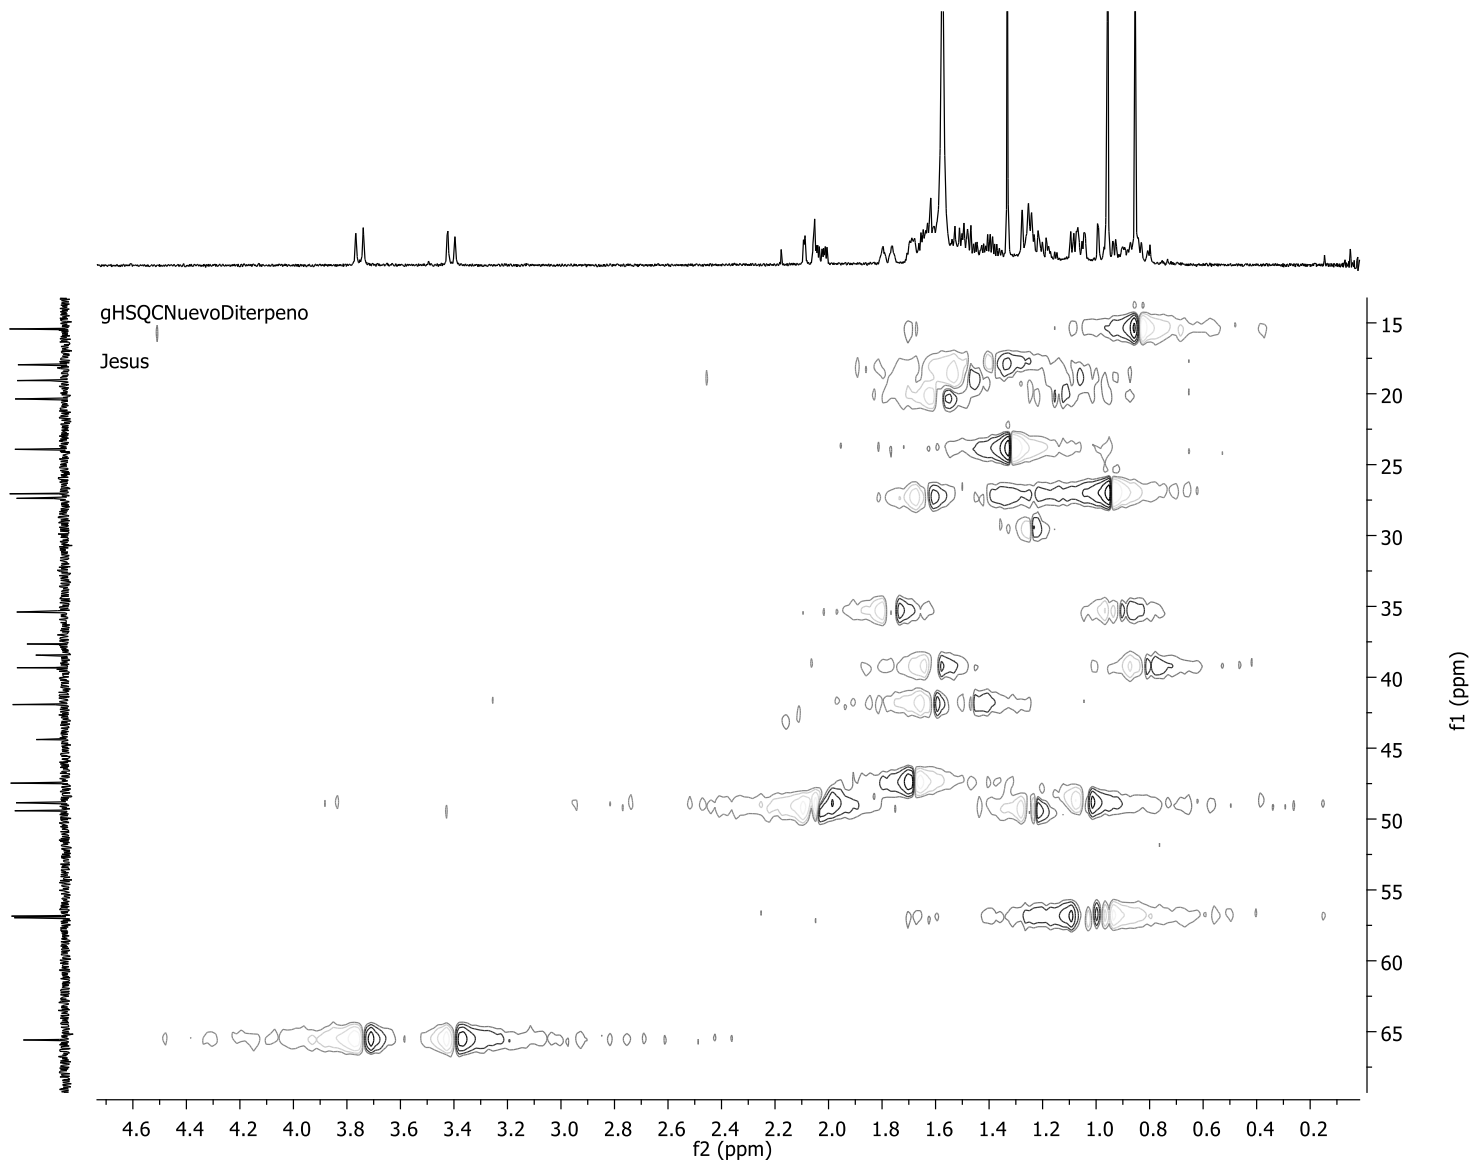

Figure S6: HSQC spectrum of phyllocladan-16 $\alpha$ ,19-diol (1)



data\_s2pul\_001

Jesus\_Asr\_Nuevoditerpenokaureno\_3

## Compound 2 NMR

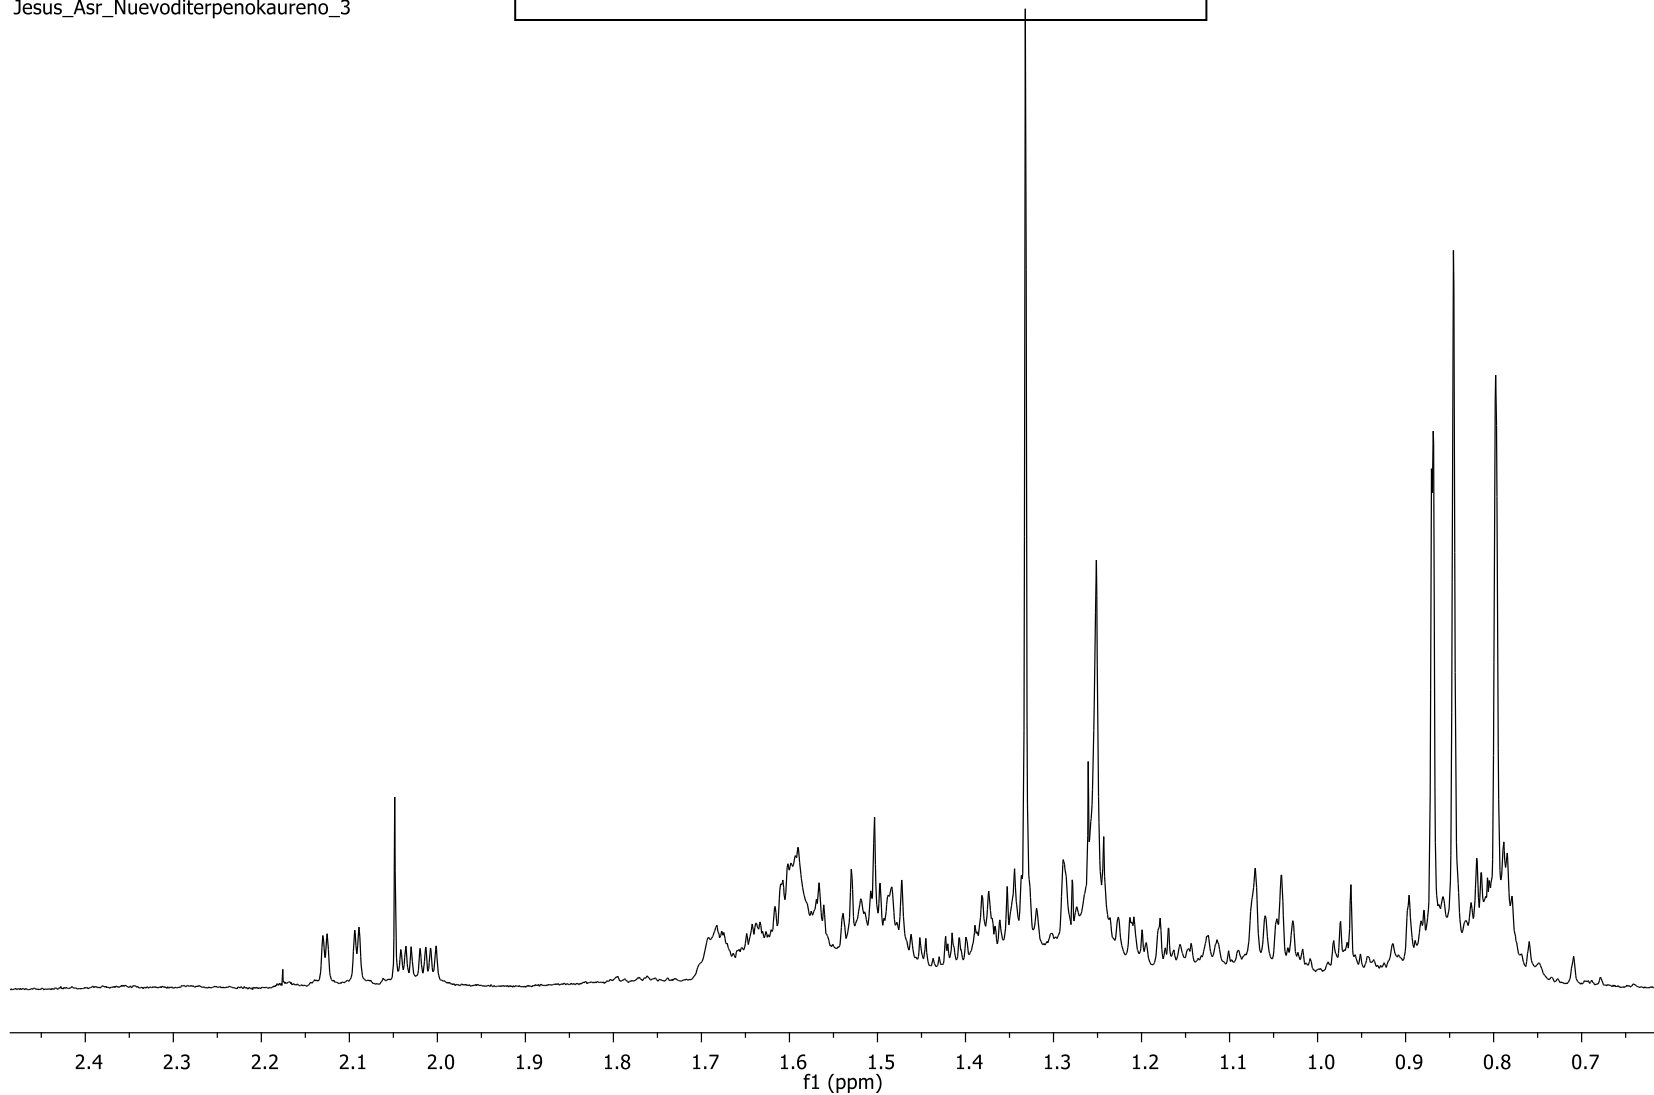

Figure S7: <sup>1</sup>H-NMR spectrum of phyllocladan-16α-ol (**2**)

data\_APT\_001

Jesus\_Asr\_Nuevoditerpenokaureno\_3

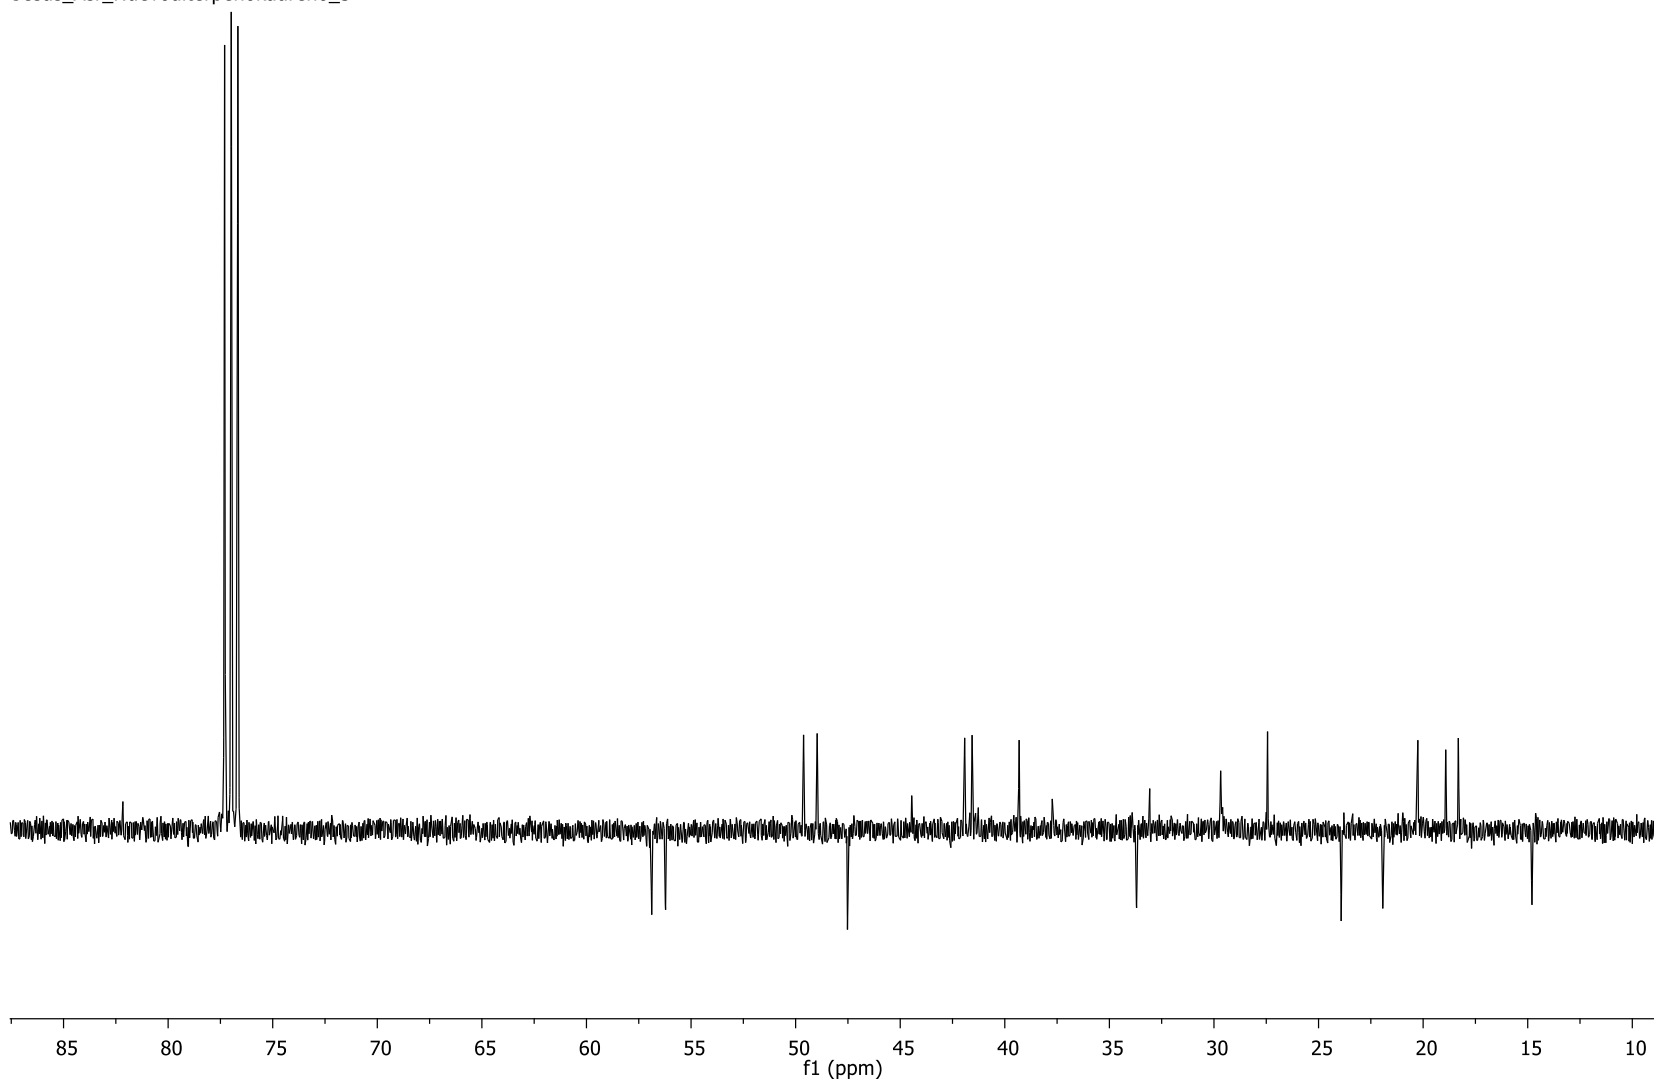

Figure S8: APT experiment spectrum of phyllocladan-16 $\alpha$ -ol (**2**)

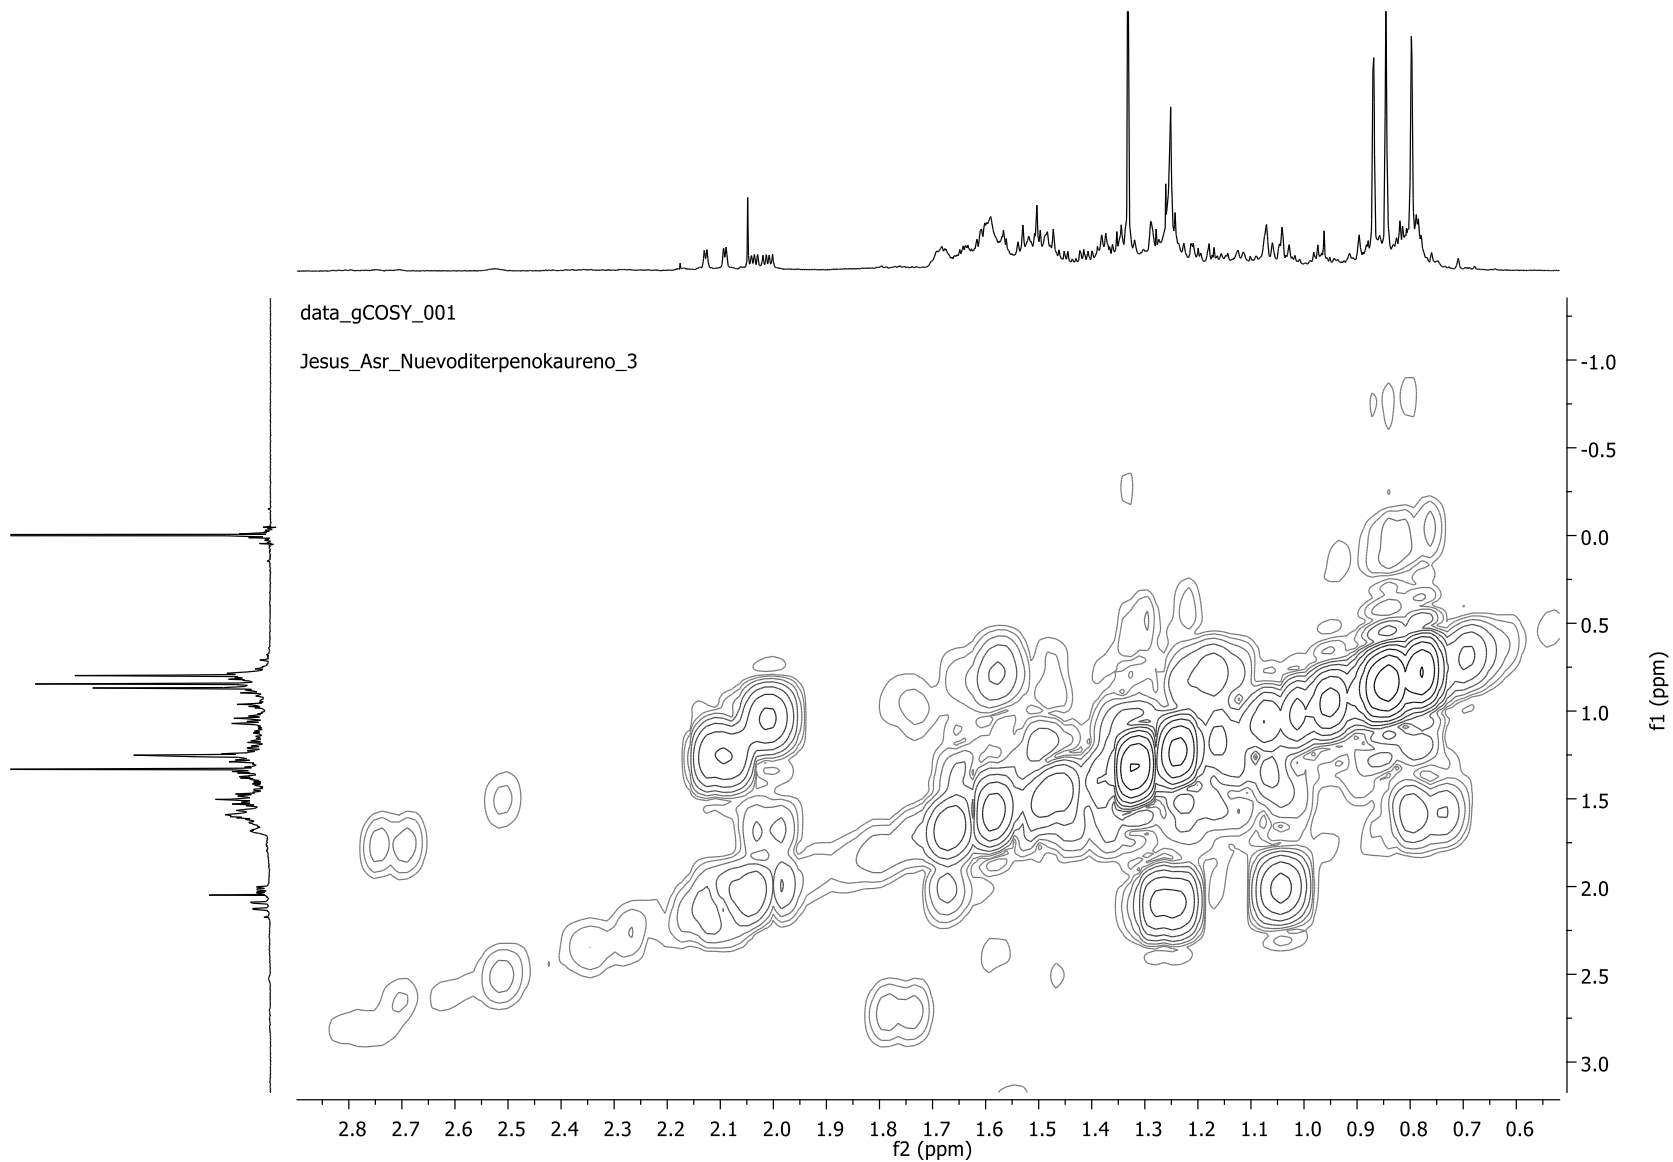

Figure S9:  $^1\text{H}$ - $^1\text{H}$  COSY spectrum of phyllocladan-16 $\alpha$ -ol (**2**)

data\_s2pul\_001  
Jesus\_Hexanico\_raiz

Compound 3 NMR

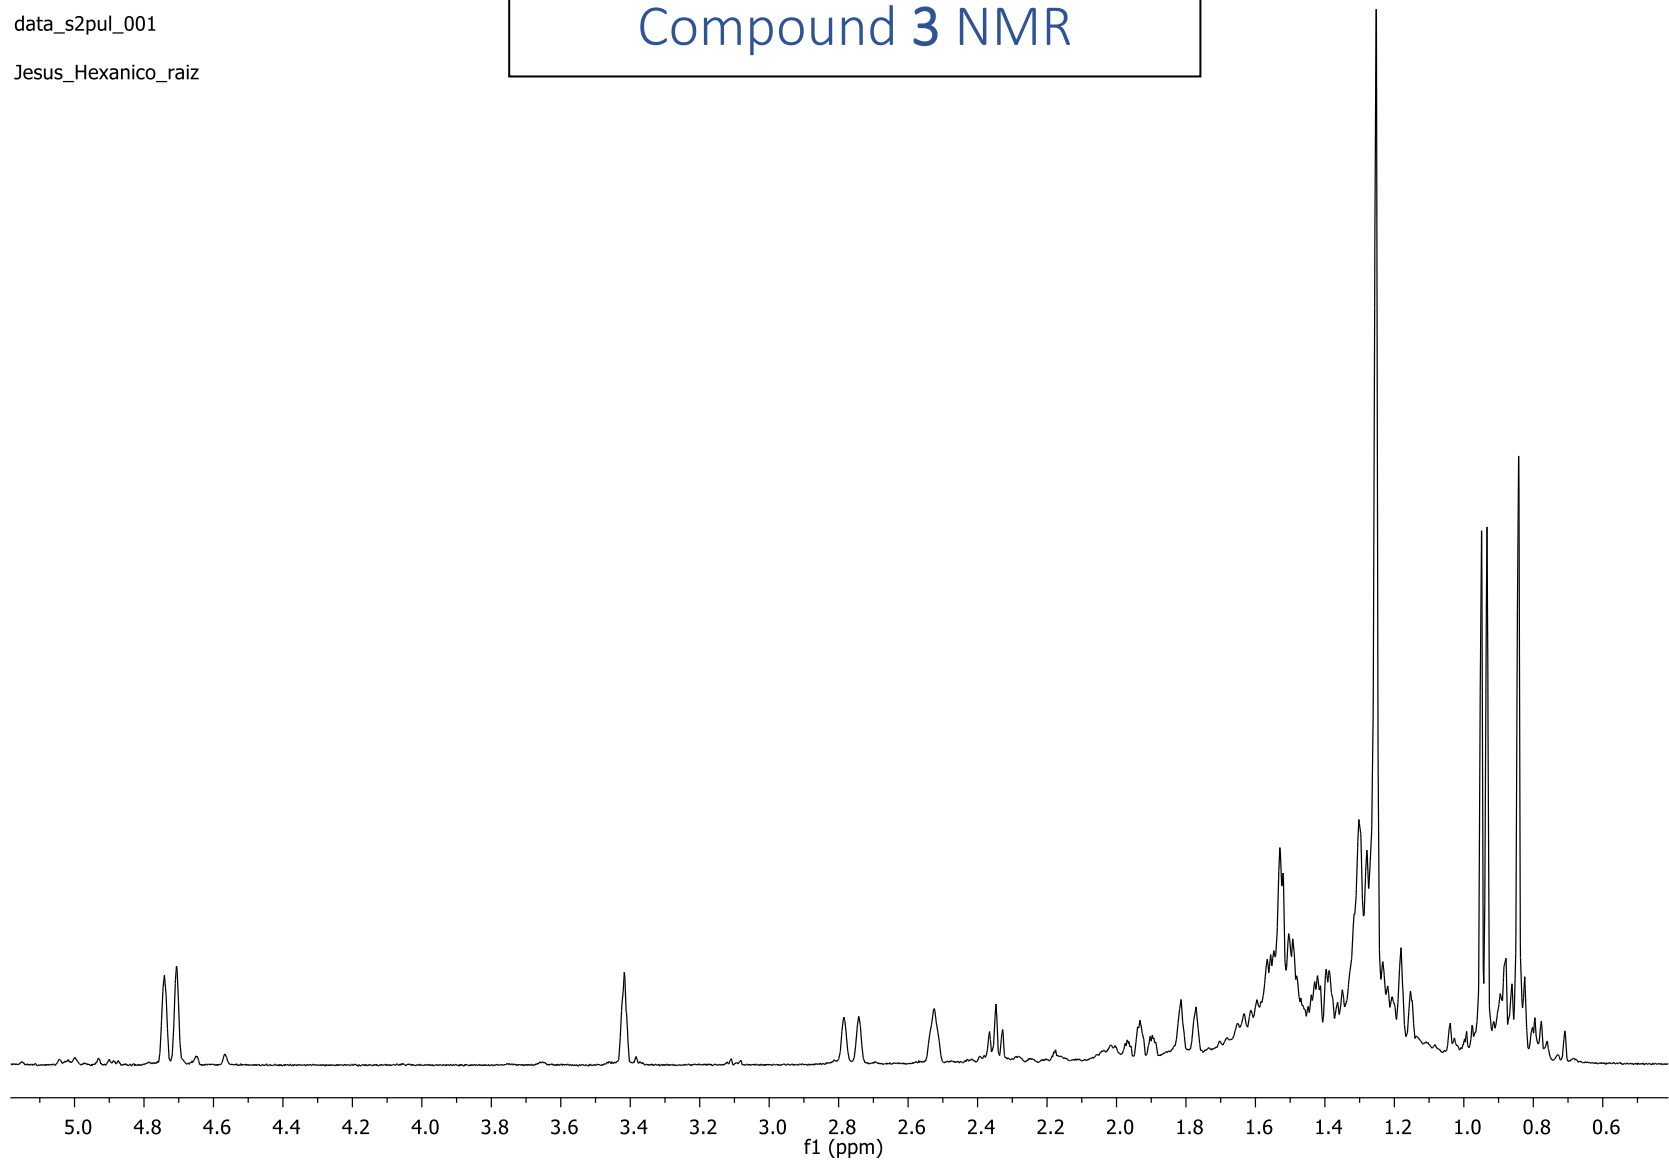

Figure S10: <sup>1</sup>H-NMR spectrum of phylloclad-16-en-3-ol (3)

data\_APT\_001

Jesus\_Hexanico\_raiz

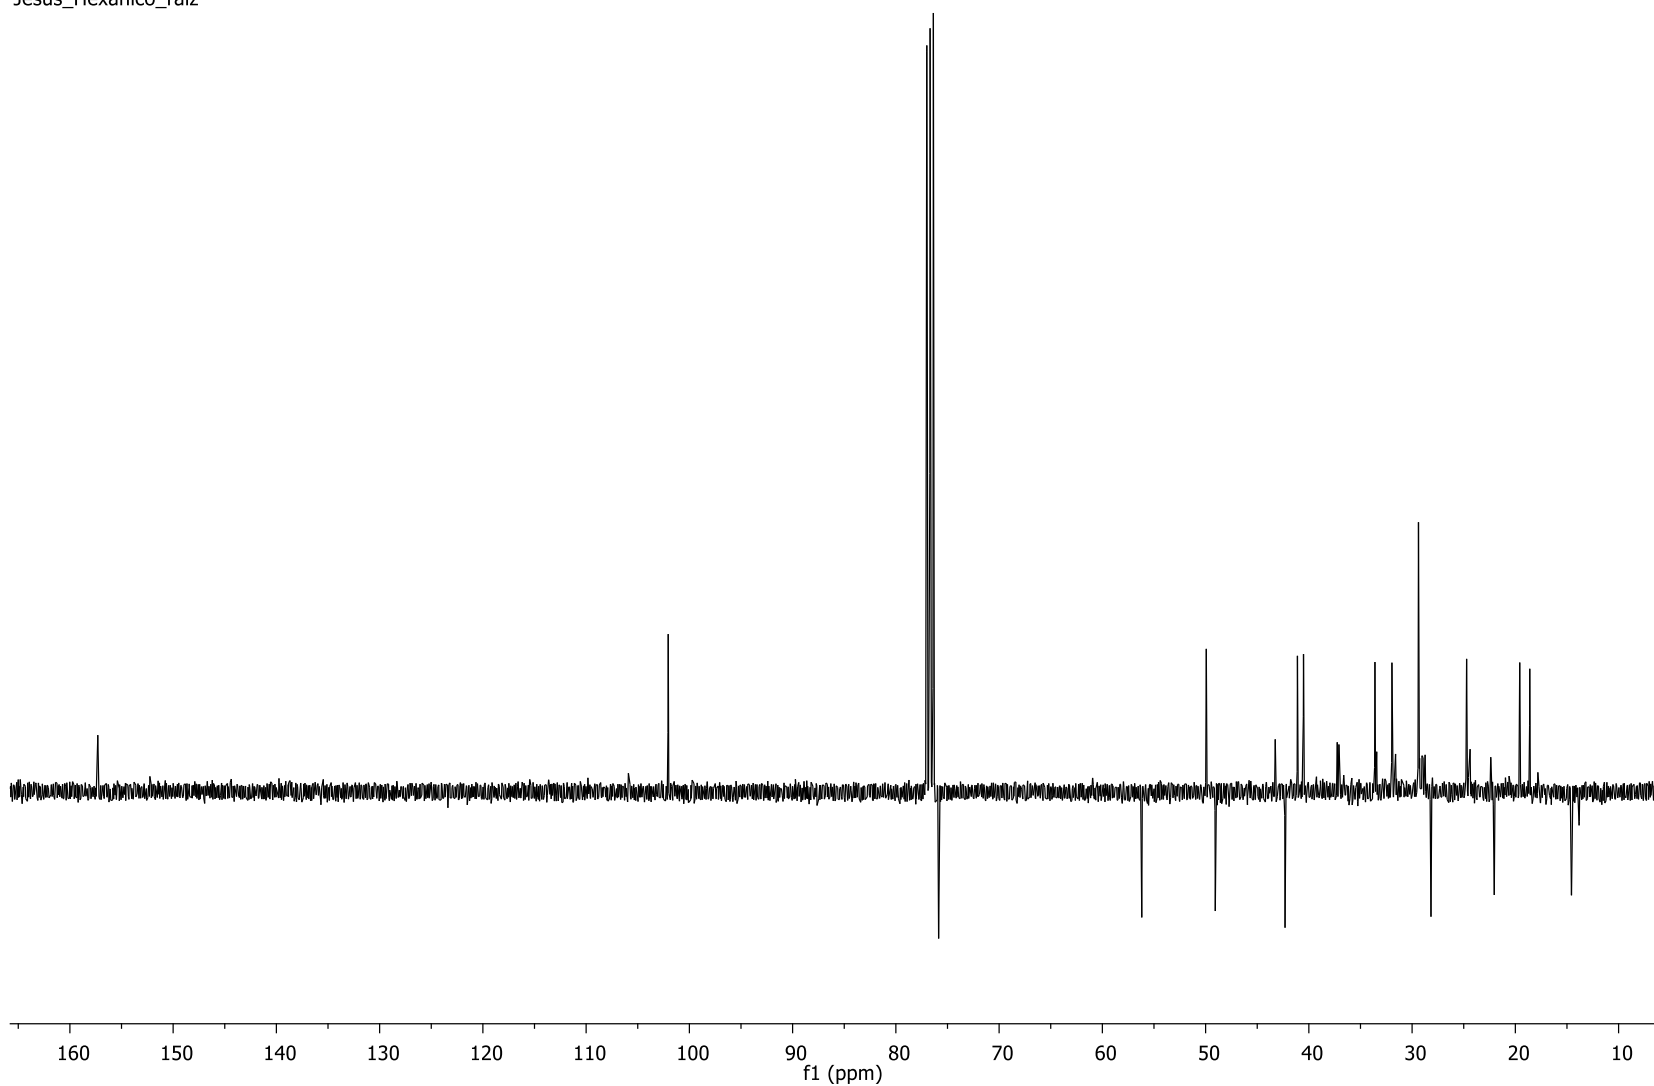

Figure S11: APT experiment spectrum of phylloclad-16-en-3-ol (**3**)

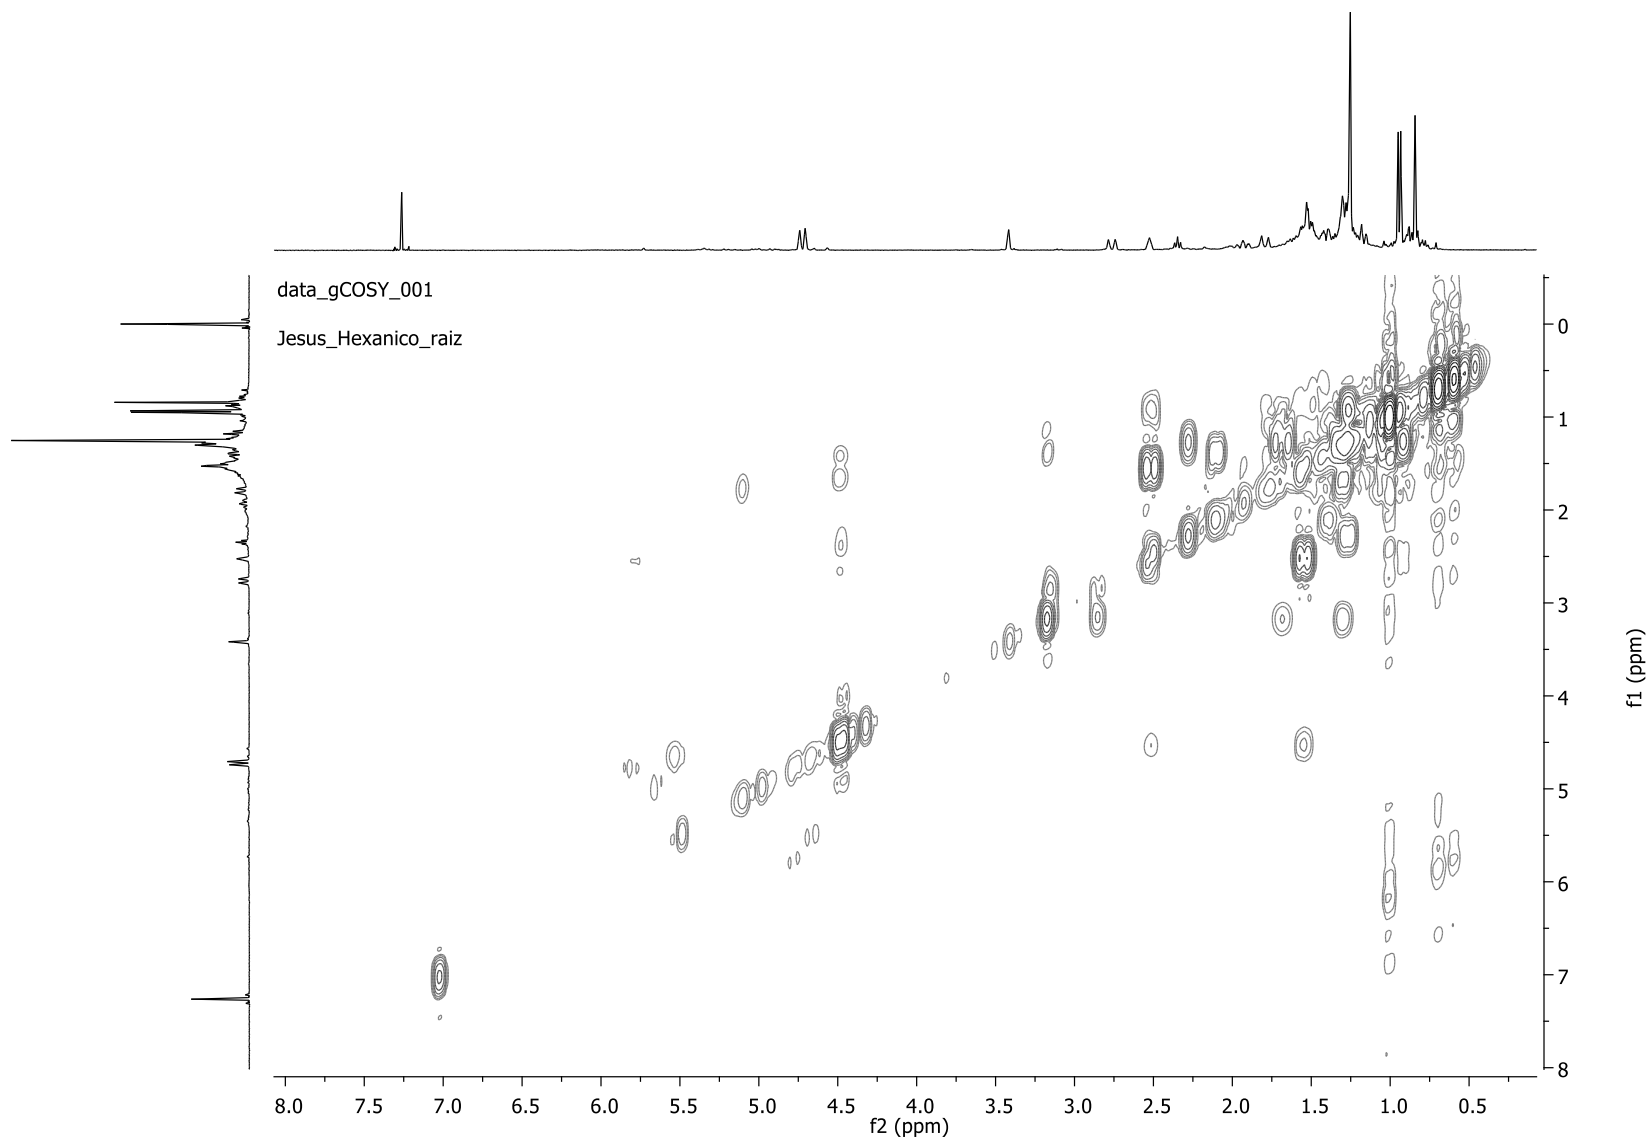

Figure S12:  $^1\text{H}$ - $^1\text{H}$  COSY spectrum of phylloclad-16-en-3-ol (**3**)

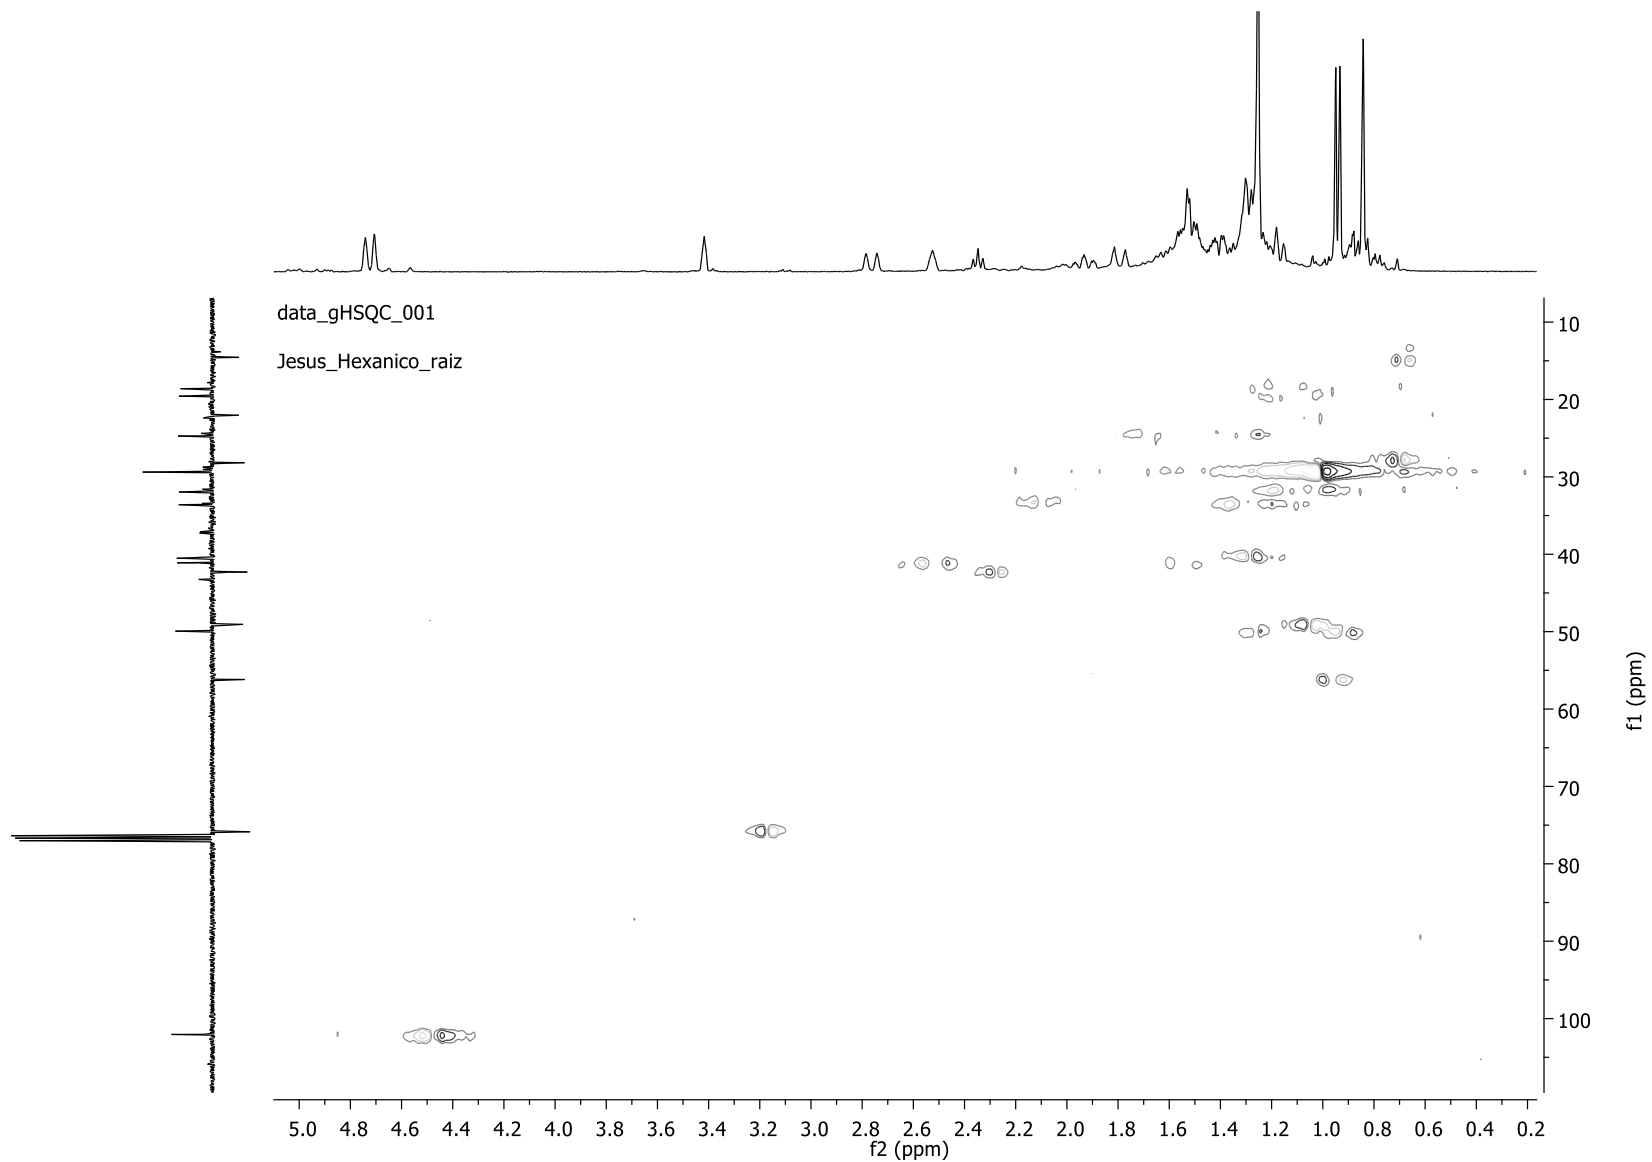

Figure S14: HSQC spectrum of phylloclad-16-en-3-ol (3)

# Compound 1 X-ray data diffraction

Table 1. Crystal data and structure refinement for C<sub>20</sub>H<sub>34</sub>O<sub>2</sub>.

|                             |                                                                                                          |
|-----------------------------|----------------------------------------------------------------------------------------------------------|
| Identification code         | mtv03                                                                                                    |
| Empirical formula           | C <sub>20</sub> H <sub>34</sub> O <sub>2</sub>                                                           |
| Formula weight              | 306.47                                                                                                   |
| Temperature                 | 293(2) K                                                                                                 |
| Wavelength                  | 1.54184 Å                                                                                                |
| Crystal system, space group | Orthorhombic, P 21 21 21                                                                                 |
| Unit cell dimensions        | a = 7.0248(5) Å alpha = 90 deg.<br>b = 14.6654(17) Å beta = 90 deg.<br>c = 17.5721(16) Å gamma = 90 deg. |
| Volume                      | 1810.3(3) Å <sup>3</sup>                                                                                 |
| Z, Calculated density       | 4, 1.124 Mg/m <sup>3</sup>                                                                               |
| Absorption coefficient      | 0.537 mm <sup>-1</sup>                                                                                   |



F(000) 680

Crystal size 0.29 x 0.09 x 0.08 mm

Theta range for data collection 3.93 to 66.09 deg.

Limiting indices  $-6 \leq h \leq 8$ ,  $-17 \leq k \leq 15$ ,  $-20 \leq l \leq 19$

Reflections collected / unique 7379 / 3126 [R(int) = 0.0443]

Completeness to theta = 66.09 99.9 %

Absorption correction Semi-empirical from equivalents

Max. and min. transmission 0.9583 and 0.8599

Refinement method Full-matrix least-squares on  $F^2$

Data / restraints / parameters 3126 / 0 / 210

Goodness-of-fit on  $F^2$  1.036

Final R indices [ $I > 2\sigma(I)$ ] R1 = 0.0633, wR2 = 0.1573

R indices (all data) R1 = 0.0881, wR2 = 0.1791

Absolute structure parameter -0.2(5)

Largest diff. peak and hole 0.124 and -0.172 e. $\text{\AA}^{-3}$



Table 2. Atomic coordinates ( $\times 10^4$ ) and equivalent isotropic displacement parameters ( $\text{\AA}^2 \times 10^3$ ) for C<sub>20</sub>H<sub>34</sub>O<sub>2</sub>.

U(eq) is defined as one third of the trace of the orthogonalized U<sub>ij</sub> tensor.

---

|       | x       | y        | z        | U(eq) |
|-------|---------|----------|----------|-------|
| O(1)  | 1421(4) | 2412(2)  | 5938(2)  | 79(1) |
| O(2)  | 794(4)  | -1610(2) | 10079(2) | 74(1) |
| C(1)  | 409(7)  | 2833(2)  | 8709(2)  | 81(1) |
| C(2)  | 262(7)  | 3416(3)  | 7999(2)  | 89(1) |
| C(3)  | 2000(6) | 3323(3)  | 7502(2)  | 81(1) |
| C(4)  | 2501(5) | 2346(3)  | 7274(2)  | 70(1) |
| C(5)  | 2487(5) | 1733(2)  | 8002(2)  | 64(1) |
| C(6)  | 2977(6) | 733(3)   | 7861(2)  | 74(1) |
| C(7)  | 3532(5) | 272(3)   | 8605(2)  | 70(1) |
| C(8)  | 2053(4) | 341(2)   | 9233(2)  | 62(1) |
| C(9)  | 1327(5) | 1331(2)  | 9308(2)  | 64(1) |
| C(10) | 751(5)  | 1816(2)  | 8545(2)  | 64(1) |
| C(11) | -195(7) | 1395(3)  | 9931(2)  | 82(1) |
| C(12) | 290(6)  | 853(3)   | 10648(2) | 82(1) |
| C(13) | 1179(5) | -79(2)   | 10493(2) | 69(1) |
| C(14) | 2937(5) | 58(3)    | 10000(2) | 68(1) |
| C(15) | 393(5)  | -365(2)  | 9179(2)  | 68(1) |
| C(16) | -3(5)   | -708(3)  | 9990(2)  | 67(1) |

---

|       |          |         |          |       |
|-------|----------|---------|----------|-------|
| C(17) | -2115(6) | -760(3) | 10189(3) | 96(1) |
| C(18) | 4531(5)  | 2366(3) | 6940(2)  | 84(1) |
| C(19) | 1114(5)  | 1997(3) | 6658(2)  | 74(1) |
| C(20) | -1088(5) | 1416(3) | 8188(2)  | 81(1) |

---

Table 3. Bond lengths [Å] and angles [deg] for C<sub>20</sub>H<sub>34</sub>O<sub>2</sub>.

---

|            |          |
|------------|----------|
| O(1)-C(19) | 1.421(5) |
| O(1)-H(10) | 0.77(4)  |
| O(2)-C(16) | 1.444(4) |
| O(2)-H(20) | 0.86(4)  |
| C(1)-C(2)  | 1.515(5) |
| C(1)-C(10) | 1.539(5) |
| C(1)-H(1A) | 0.9700   |
| C(1)-H(1B) | 0.9700   |
| C(2)-C(3)  | 1.508(6) |
| C(2)-H(2A) | 0.9700   |
| C(2)-H(2B) | 0.9700   |
| C(3)-C(4)  | 1.529(6) |
| C(3)-H(3A) | 0.9700   |
| C(3)-H(3B) | 0.9700   |
| C(4)-C(18) | 1.543(5) |
| C(4)-C(19) | 1.544(5) |
| C(4)-C(5)  | 1.562(5) |
| C(5)-C(6)  | 1.527(5) |
| C(5)-C(10) | 1.554(5) |
| C(5)-H(5)  | 0.9800   |
| C(6)-C(7)  | 1.522(5) |
| C(6)-H(6A) | 0.9700   |
| C(6)-H(6B) | 0.9700   |
| C(7)-C(8)  | 1.519(4) |
| C(7)-H(7A) | 0.9700   |

|              |          |
|--------------|----------|
| C(7)-H(7B)   | 0.9700   |
| C(8)-C(14)   | 1.541(4) |
| C(8)-C(9)    | 1.545(5) |
| C(8)-C(15)   | 1.562(5) |
| C(9)-C(11)   | 1.534(5) |
| C(9)-C(10)   | 1.569(5) |
| C(9)-H(9)    | 0.9800   |
| C(10)-C(20)  | 1.551(5) |
| C(11)-C(12)  | 1.528(5) |
| C(11)-H(11A) | 0.9700   |
| C(11)-H(11B) | 0.9700   |
| C(12)-C(13)  | 1.528(5) |
| C(12)-H(12A) | 0.9700   |
| C(12)-H(12B) | 0.9700   |
| C(13)-C(14)  | 1.522(5) |
| C(13)-C(16)  | 1.524(5) |
| C(13)-H(13)  | 0.9800   |
| C(14)-H(14A) | 0.9700   |
| C(14)-H(14B) | 0.9700   |
| C(15)-C(16)  | 1.537(5) |
| C(15)-H(15A) | 0.9700   |
| C(15)-H(15B) | 0.9700   |
| C(16)-C(17)  | 1.526(5) |
| C(17)-H(17A) | 0.9600   |
| C(17)-H(17B) | 0.9600   |
| C(17)-H(17C) | 0.9600   |
| C(18)-H(18A) | 0.9600   |
| C(18)-H(18B) | 0.9600   |
| C(18)-H(18C) | 0.9600   |

|                  |          |
|------------------|----------|
| C(19)-H(19A)     | 0.9700   |
| C(19)-H(19B)     | 0.9700   |
| C(20)-H(20A)     | 0.9600   |
| C(20)-H(20B)     | 0.9600   |
| C(20)-H(20C)     | 0.9600   |
|                  |          |
| C(19)-O(1)-H(1O) | 110(3)   |
| C(16)-O(2)-H(2O) | 110(3)   |
| C(2)-C(1)-C(10)  | 113.8(3) |
| C(2)-C(1)-H(1A)  | 108.8    |
| C(10)-C(1)-H(1A) | 108.8    |
| C(2)-C(1)-H(1B)  | 108.8    |
| C(10)-C(1)-H(1B) | 108.8    |
| H(1A)-C(1)-H(1B) | 107.7    |
| C(3)-C(2)-C(1)   | 111.8(3) |
| C(3)-C(2)-H(2A)  | 109.3    |
| C(1)-C(2)-H(2A)  | 109.3    |
| C(3)-C(2)-H(2B)  | 109.3    |
| C(1)-C(2)-H(2B)  | 109.3    |
| H(2A)-C(2)-H(2B) | 107.9    |
| C(2)-C(3)-C(4)   | 115.0(3) |
| C(2)-C(3)-H(3A)  | 108.5    |
| C(4)-C(3)-H(3A)  | 108.5    |
| C(2)-C(3)-H(3B)  | 108.5    |
| C(4)-C(3)-H(3B)  | 108.5    |
| H(3A)-C(3)-H(3B) | 107.5    |
| C(3)-C(4)-C(18)  | 107.1(3) |
| C(3)-C(4)-C(19)  | 110.4(3) |
| C(18)-C(4)-C(19) | 108.8(3) |

|                  |          |
|------------------|----------|
| C(3)-C(4)-C(5)   | 108.9(3) |
| C(18)-C(4)-C(5)  | 109.2(3) |
| C(19)-C(4)-C(5)  | 112.3(3) |
| C(6)-C(5)-C(10)  | 110.5(3) |
| C(6)-C(5)-C(4)   | 114.8(3) |
| C(10)-C(5)-C(4)  | 117.6(3) |
| C(6)-C(5)-H(5)   | 104.0    |
| C(10)-C(5)-H(5)  | 104.0    |
| C(4)-C(5)-H(5)   | 104.0    |
| C(7)-C(6)-C(5)   | 110.2(3) |
| C(7)-C(6)-H(6A)  | 109.6    |
| C(5)-C(6)-H(6A)  | 109.6    |
| C(7)-C(6)-H(6B)  | 109.6    |
| C(5)-C(6)-H(6B)  | 109.6    |
| H(6A)-C(6)-H(6B) | 108.1    |
| C(8)-C(7)-C(6)   | 114.8(3) |
| C(8)-C(7)-H(7A)  | 108.6    |
| C(6)-C(7)-H(7A)  | 108.6    |
| C(8)-C(7)-H(7B)  | 108.6    |
| C(6)-C(7)-H(7B)  | 108.6    |
| H(7A)-C(7)-H(7B) | 107.6    |
| C(7)-C(8)-C(14)  | 109.9(2) |
| C(7)-C(8)-C(9)   | 110.5(3) |
| C(14)-C(8)-C(9)  | 108.2(3) |
| C(7)-C(8)-C(15)  | 115.0(3) |
| C(14)-C(8)-C(15) | 100.1(3) |
| C(9)-C(8)-C(15)  | 112.5(3) |
| C(11)-C(9)-C(8)  | 110.3(3) |
| C(11)-C(9)-C(10) | 113.8(3) |



|                     |          |
|---------------------|----------|
| C(8)-C(9)-C(10)     | 116.0(3) |
| C(11)-C(9)-H(9)     | 105.2    |
| C(8)-C(9)-H(9)      | 105.2    |
| C(10)-C(9)-H(9)     | 105.2    |
| C(1)-C(10)-C(20)    | 108.2(3) |
| C(1)-C(10)-C(5)     | 108.2(3) |
| C(20)-C(10)-C(5)    | 112.1(3) |
| C(1)-C(10)-C(9)     | 108.7(3) |
| C(20)-C(10)-C(9)    | 112.9(3) |
| C(5)-C(10)-C(9)     | 106.7(3) |
| C(12)-C(11)-C(9)    | 113.7(3) |
| C(12)-C(11)-H(11A)  | 108.8    |
| C(9)-C(11)-H(11A)   | 108.8    |
| C(12)-C(11)-H(11B)  | 108.8    |
| C(9)-C(11)-H(11B)   | 108.8    |
| H(11A)-C(11)-H(11B) | 107.7    |
| C(13)-C(12)-C(11)   | 114.1(3) |
| C(13)-C(12)-H(12A)  | 108.7    |
| C(11)-C(12)-H(12A)  | 108.7    |
| C(13)-C(12)-H(12B)  | 108.7    |
| C(11)-C(12)-H(12B)  | 108.7    |
| H(12A)-C(12)-H(12B) | 107.6    |
| C(14)-C(13)-C(16)   | 101.1(3) |
| C(14)-C(13)-C(12)   | 108.4(3) |
| C(16)-C(13)-C(12)   | 115.0(3) |
| C(14)-C(13)-H(13)   | 110.7    |
| C(16)-C(13)-H(13)   | 110.7    |
| C(12)-C(13)-H(13)   | 110.7    |
| C(13)-C(14)-C(8)    | 101.9(3) |

|                     |          |
|---------------------|----------|
| C(13)-C(14)-H(14A)  | 111.4    |
| C(8)-C(14)-H(14A)   | 111.4    |
| C(13)-C(14)-H(14B)  | 111.4    |
| C(8)-C(14)-H(14B)   | 111.4    |
| H(14A)-C(14)-H(14B) | 109.3    |
| C(16)-C(15)-C(8)    | 107.2(3) |
| C(16)-C(15)-H(15A)  | 110.3    |
| C(8)-C(15)-H(15A)   | 110.3    |
| C(16)-C(15)-H(15B)  | 110.3    |
| C(8)-C(15)-H(15B)   | 110.3    |
| H(15A)-C(15)-H(15B) | 108.5    |
| O(2)-C(16)-C(13)    | 106.2(3) |
| O(2)-C(16)-C(17)    | 107.8(3) |
| C(13)-C(16)-C(17)   | 115.3(3) |
| O(2)-C(16)-C(15)    | 109.3(3) |
| C(13)-C(16)-C(15)   | 103.9(3) |
| C(17)-C(16)-C(15)   | 113.9(3) |
| C(16)-C(17)-H(17A)  | 109.5    |
| C(16)-C(17)-H(17B)  | 109.5    |
| H(17A)-C(17)-H(17B) | 109.5    |
| C(16)-C(17)-H(17C)  | 109.5    |
| H(17A)-C(17)-H(17C) | 109.5    |
| H(17B)-C(17)-H(17C) | 109.5    |
| C(4)-C(18)-H(18A)   | 109.5    |
| C(4)-C(18)-H(18B)   | 109.5    |
| H(18A)-C(18)-H(18B) | 109.5    |
| C(4)-C(18)-H(18C)   | 109.5    |
| H(18A)-C(18)-H(18C) | 109.5    |
| H(18B)-C(18)-H(18C) | 109.5    |

|                     |          |
|---------------------|----------|
| O(1)-C(19)-C(4)     | 112.8(3) |
| O(1)-C(19)-H(19A)   | 109.0    |
| C(4)-C(19)-H(19A)   | 109.0    |
| O(1)-C(19)-H(19B)   | 109.0    |
| C(4)-C(19)-H(19B)   | 109.0    |
| H(19A)-C(19)-H(19B) | 107.8    |
| C(10)-C(20)-H(20A)  | 109.5    |
| C(10)-C(20)-H(20B)  | 109.5    |
| H(20A)-C(20)-H(20B) | 109.5    |
| C(10)-C(20)-H(20C)  | 109.5    |
| H(20A)-C(20)-H(20C) | 109.5    |
| H(20B)-C(20)-H(20C) | 109.5    |

---

Symmetry transformations used to generate equivalent atoms:

Table 4. Anisotropic displacement parameters ( $\text{\AA}^2 \times 10^3$ ) for C<sub>20</sub>H<sub>34</sub>O<sub>2</sub>.

The anisotropic displacement factor exponent takes the form:

$$-2 \pi^2 [ h^2 a^{*2} U_{11} + \dots + 2 h k a^* b^* U_{12} ]$$

---

|       | U <sub>11</sub> | U <sub>22</sub> | U <sub>33</sub> | U <sub>23</sub> | U <sub>13</sub> | U <sub>12</sub> |
|-------|-----------------|-----------------|-----------------|-----------------|-----------------|-----------------|
| O(1)  | 72(2)           | 96(2)           | 68(2)           | 2(2)            | -7(1)           | 20(2)           |
| O(2)  | 71(2)           | 70(2)           | 82(2)           | 2(1)            | -15(1)          | -3(1)           |
| C(1)  | 90(3)           | 69(2)           | 84(2)           | -4(2)           | 3(2)            | 15(2)           |
| C(2)  | 100(3)          | 74(2)           | 91(3)           | -3(2)           | -7(2)           | 22(2)           |
| C(3)  | 93(3)           | 73(2)           | 76(2)           | 6(2)            | -15(2)          | -1(2)           |
| C(4)  | 57(2)           | 84(3)           | 70(2)           | -2(2)           | -11(2)          | -1(2)           |
| C(5)  | 53(2)           | 70(2)           | 69(2)           | -4(2)           | -8(2)           | 1(2)            |
| C(6)  | 66(2)           | 84(2)           | 71(2)           | -5(2)           | 1(2)            | 11(2)           |
| C(7)  | 56(2)           | 70(2)           | 82(2)           | 3(2)            | 5(2)            | 9(2)            |
| C(8)  | 49(2)           | 72(2)           | 65(2)           | -8(2)           | -8(2)           | 7(2)            |
| C(9)  | 60(2)           | 64(2)           | 67(2)           | -7(2)           | -7(2)           | 3(2)            |
| C(10) | 55(2)           | 69(2)           | 67(2)           | -5(2)           | -2(2)           | 8(2)            |
| C(11) | 91(3)           | 75(2)           | 79(2)           | -8(2)           | 11(2)           | 22(2)           |
| C(12) | 92(3)           | 83(3)           | 69(2)           | -8(2)           | 2(2)            | 7(2)            |
| C(13) | 66(2)           | 78(2)           | 62(2)           | -1(2)           | -11(2)          | 0(2)            |
| C(14) | 55(2)           | 74(2)           | 76(2)           | -5(2)           | -15(2)          | 0(2)            |
| C(15) | 55(2)           | 74(2)           | 77(2)           | -5(2)           | -11(2)          | 1(2)            |
| C(16) | 51(2)           | 75(2)           | 74(2)           | -5(2)           | -7(2)           | -2(2)           |
| C(17) | 55(2)           | 113(3)          | 120(4)          | 2(3)            | 4(2)            | -1(2)           |

C(18) 60(2) 105(3) 88(2) 8(2) -9(2) -5(2)

C(19) 60(2) 92(3) 70(2) -3(2) -10(2) -1(2)

C(20) 53(2) 107(3) 82(2) 8(2) -7(2) 8(2)

---

Table 5. Hydrogen coordinates ( $\times 10^4$ ) and isotropic displacement parameters ( $\text{\AA}^2 \times 10^3$ ) for C<sub>20</sub>H<sub>34</sub>O<sub>2</sub>.

---

|        | x     | y    | z     | U(eq) |
|--------|-------|------|-------|-------|
| H(1A)  | -758  | 2896 | 8999  | 97    |
| H(1B)  | 1444  | 3061 | 9021  | 97    |
| H(2A)  | -856  | 3236 | 7712  | 106   |
| H(2B)  | 109   | 4049 | 8145  | 106   |
| H(3A)  | 3079  | 3585 | 7768  | 97    |
| H(3B)  | 1801  | 3677 | 7042  | 97    |
| H(5)   | 3558  | 1962 | 8304  | 76    |
| H(6A)  | 1887  | 423  | 7642  | 88    |
| H(6B)  | 4024  | 692  | 7503  | 88    |
| H(7A)  | 3778  | -367 | 8505  | 84    |
| H(7B)  | 4709  | 542  | 8786  | 84    |
| H(9)   | 2414  | 1680 | 9502  | 76    |
| H(11A) | -367  | 2030 | 10068 | 98    |
| H(11B) | -1393 | 1174 | 9729  | 98    |
| H(12A) | 1166  | 1209 | 10955 | 98    |
| H(12B) | -864  | 768  | 10943 | 98    |
| H(13)  | 1515  | -384 | 10971 | 82    |
| H(14A) | 3664  | -502 | 9952  | 82    |
| H(14B) | 3751  | 534  | 10203 | 82    |
| H(15A) | -735  | -79  | 8969  | 82    |

---

|        |          |           |          |        |
|--------|----------|-----------|----------|--------|
| H(15B) | 754      | -869      | 8852     | 82     |
| H(17A) | -2744    | -1167     | 9843     | 144    |
| H(17B) | -2671    | -164      | 10150    | 144    |
| H(17C) | -2258    | -983      | 10700    | 144    |
| H(18A) | 4852     | 1772      | 6748     | 126    |
| H(18B) | 5419     | 2536      | 7330     | 126    |
| H(18C) | 4585     | 2802      | 6533     | 126    |
| H(19A) | 1258     | 1342      | 6608     | 89     |
| H(19B) | -182     | 2118      | 6820     | 89     |
| H(20A) | -2055    | 1368      | 8572     | 121    |
| H(20B) | -824     | 822       | 7984     | 121    |
| H(20C) | -1522    | 1810      | 7788     | 121    |
| H(20)  | 350(70)  | -1970(30) | 9740(20) | 97(15) |
| H(10)  | 2200(60) | 2150(30)  | 5720(30) | 87(15) |

---

Table 6. Torsion angles [deg] for C<sub>20</sub>H<sub>34</sub>O<sub>2</sub>.

---

|                       |           |
|-----------------------|-----------|
| C(10)-C(1)-C(2)-C(3)  | -56.2(5)  |
| C(1)-C(2)-C(3)-C(4)   | 54.7(5)   |
| C(2)-C(3)-C(4)-C(18)  | -166.8(3) |
| C(2)-C(3)-C(4)-C(19)  | 74.9(4)   |
| C(2)-C(3)-C(4)-C(5)   | -48.8(4)  |
| C(3)-C(4)-C(5)-C(6)   | -179.7(3) |
| C(18)-C(4)-C(5)-C(6)  | -63.0(4)  |
| C(19)-C(4)-C(5)-C(6)  | 57.8(4)   |
| C(3)-C(4)-C(5)-C(10)  | 47.7(4)   |
| C(18)-C(4)-C(5)-C(10) | 164.4(3)  |
| C(19)-C(4)-C(5)-C(10) | -74.8(4)  |
| C(10)-C(5)-C(6)-C(7)  | -61.9(4)  |
| C(4)-C(5)-C(6)-C(7)   | 162.2(3)  |
| C(5)-C(6)-C(7)-C(8)   | 55.7(4)   |
| C(6)-C(7)-C(8)-C(14)  | -166.8(3) |
| C(6)-C(7)-C(8)-C(9)   | -47.4(4)  |
| C(6)-C(7)-C(8)-C(15)  | 81.2(4)   |
| C(7)-C(8)-C(9)-C(11)  | 178.9(3)  |
| C(14)-C(8)-C(9)-C(11) | -60.7(4)  |
| C(15)-C(8)-C(9)-C(11) | 48.9(4)   |
| C(7)-C(8)-C(9)-C(10)  | 47.7(4)   |
| C(14)-C(8)-C(9)-C(10) | 168.1(3)  |
| C(15)-C(8)-C(9)-C(10) | -82.3(4)  |
| C(2)-C(1)-C(10)-C(20) | -69.7(4)  |
| C(2)-C(1)-C(10)-C(5)  | 52.0(4)   |



|                         |           |
|-------------------------|-----------|
| C(2)-C(1)-C(10)-C(9)    | 167.5(4)  |
| C(6)-C(5)-C(10)-C(1)    | 176.2(3)  |
| C(4)-C(5)-C(10)-C(1)    | -49.3(4)  |
| C(6)-C(5)-C(10)-C(20)   | -64.6(4)  |
| C(4)-C(5)-C(10)-C(20)   | 69.9(4)   |
| C(6)-C(5)-C(10)-C(9)    | 59.4(3)   |
| C(4)-C(5)-C(10)-C(9)    | -166.1(3) |
| C(11)-C(9)-C(10)-C(1)   | 60.3(4)   |
| C(8)-C(9)-C(10)-C(1)    | -170.1(3) |
| C(11)-C(9)-C(10)-C(20)  | -59.7(4)  |
| C(8)-C(9)-C(10)-C(20)   | 69.9(4)   |
| C(11)-C(9)-C(10)-C(5)   | 176.8(3)  |
| C(8)-C(9)-C(10)-C(5)    | -53.7(4)  |
| C(8)-C(9)-C(11)-C(12)   | 42.6(4)   |
| C(10)-C(9)-C(11)-C(12)  | 174.9(3)  |
| C(9)-C(11)-C(12)-C(13)  | -40.9(5)  |
| C(11)-C(12)-C(13)-C(14) | 55.9(4)   |
| C(11)-C(12)-C(13)-C(16) | -56.4(5)  |
| C(16)-C(13)-C(14)-C(8)  | 51.1(3)   |
| C(12)-C(13)-C(14)-C(8)  | -70.2(3)  |
| C(7)-C(8)-C(14)-C(13)   | -165.2(3) |
| C(9)-C(8)-C(14)-C(13)   | 74.0(3)   |
| C(15)-C(8)-C(14)-C(13)  | -43.8(3)  |
| C(7)-C(8)-C(15)-C(16)   | 138.7(3)  |
| C(14)-C(8)-C(15)-C(16)  | 21.0(3)   |
| C(9)-C(8)-C(15)-C(16)   | -93.7(3)  |
| C(14)-C(13)-C(16)-O(2)  | 78.6(3)   |
| C(12)-C(13)-C(16)-O(2)  | -164.9(3) |
| C(14)-C(13)-C(16)-C(17) | -162.0(4) |

|                         |           |
|-------------------------|-----------|
| C(12)-C(13)-C(16)-C(17) | -45.5(5)  |
| C(14)-C(13)-C(16)-C(15) | -36.6(3)  |
| C(12)-C(13)-C(16)-C(15) | 79.8(4)   |
| C(8)-C(15)-C(16)-O(2)   | -103.7(3) |
| C(8)-C(15)-C(16)-C(13)  | 9.4(4)    |
| C(8)-C(15)-C(16)-C(17)  | 135.7(3)  |
| C(3)-C(4)-C(19)-O(1)    | 71.9(4)   |
| C(18)-C(4)-C(19)-O(1)   | -45.3(5)  |
| C(5)-C(4)-C(19)-O(1)    | -166.4(3) |

---

Symmetry transformations used to generate equivalent atoms:

Table 7. Hydrogen bonds for C<sub>20</sub>H<sub>34</sub>O<sub>2</sub> [A and deg.].

---

| D-H...A             | d(D-H)  | d(H...A) | d(D...A) | <(DHA) |
|---------------------|---------|----------|----------|--------|
| O(1)-H(10)...O(2)#1 | 0.77(4) | 1.97(4)  | 2.736(4) | 173(4) |
| O(2)-H(20)...O(1)#2 | 0.86(4) | 1.94(5)  | 2.770(4) | 161(4) |

---

Symmetry transformations used to generate equivalent atoms:

#1  $-x+1/2, -y, z-1/2$  #2  $-x, y-1/2, -z+3/2$

Table 1. Crystal data and structure refinement for C<sub>20</sub>H<sub>34</sub>O<sub>2</sub>.

|                             |                                                                                                                   |
|-----------------------------|-------------------------------------------------------------------------------------------------------------------|
| Identification code         | mtv03                                                                                                             |
| Empirical formula           | C <sub>20</sub> H <sub>34</sub> O <sub>2</sub>                                                                    |
| Formula weight              | 306.47                                                                                                            |
| Temperature                 | 293(2) K                                                                                                          |
| Wavelength                  | 1.54184 Å                                                                                                         |
| Crystal system, space group | Orthorhombic, P 21 21 21                                                                                          |
| Unit cell dimensions        | a = 7.0248(5) Å    alpha = 90 deg.<br>b = 14.6654(17) Å    beta = 90 deg.<br>c = 17.5721(16) Å    gamma = 90 deg. |
| Volume                      | 1810.3(3) Å <sup>3</sup>                                                                                          |
| Z, Calculated density       | 4, 1.124 Mg/m <sup>3</sup>                                                                                        |
| Absorption coefficient      | 0.537 mm <sup>-1</sup>                                                                                            |
| F(000)                      | 680                                                                                                               |
| Crystal size                | 0.29 x 0.09 x 0.08 mm                                                                                             |

Theta range for data collection 3.93 to 66.09 deg.

Limiting indices  $-6 \leq h \leq 8$ ,  $-17 \leq k \leq 15$ ,  $-20 \leq l \leq 19$

Reflections collected / unique 7379 / 3126 [R(int) = 0.0443]

Completeness to theta = 66.09 99.9 %

Absorption correction Semi-empirical from equivalents

Max. and min. transmission 0.9583 and 0.8599

Refinement method Full-matrix least-squares on  $F^2$

Data / restraints / parameters 3126 / 0 / 210

Goodness-of-fit on  $F^2$  1.036

Final R indices [ $I > 2\sigma(I)$ ] R1 = 0.0633, wR2 = 0.1573

R indices (all data) R1 = 0.0881, wR2 = 0.1791

Absolute structure parameter -0.2(5)

Largest diff. peak and hole 0.124 and -0.172 e. $\text{\AA}^{-3}$

Table 2. Atomic coordinates ( $\times 10^4$ ) and equivalent isotropic displacement parameters ( $\text{\AA}^2 \times 10^3$ ) for C<sub>20</sub>H<sub>34</sub>O<sub>2</sub>.

U(eq) is defined as one third of the trace of the orthogonalized U<sub>ij</sub> tensor.

---

|       | x       | y        | z        | U(eq) |
|-------|---------|----------|----------|-------|
| O(1)  | 1421(4) | 2412(2)  | 5938(2)  | 79(1) |
| O(2)  | 794(4)  | -1610(2) | 10079(2) | 74(1) |
| C(1)  | 409(7)  | 2833(2)  | 8709(2)  | 81(1) |
| C(2)  | 262(7)  | 3416(3)  | 7999(2)  | 89(1) |
| C(3)  | 2000(6) | 3323(3)  | 7502(2)  | 81(1) |
| C(4)  | 2501(5) | 2346(3)  | 7274(2)  | 70(1) |
| C(5)  | 2487(5) | 1733(2)  | 8002(2)  | 64(1) |
| C(6)  | 2977(6) | 733(3)   | 7861(2)  | 74(1) |
| C(7)  | 3532(5) | 272(3)   | 8605(2)  | 70(1) |
| C(8)  | 2053(4) | 341(2)   | 9233(2)  | 62(1) |
| C(9)  | 1327(5) | 1331(2)  | 9308(2)  | 64(1) |
| C(10) | 751(5)  | 1816(2)  | 8545(2)  | 64(1) |
| C(11) | -195(7) | 1395(3)  | 9931(2)  | 82(1) |
| C(12) | 290(6)  | 853(3)   | 10648(2) | 82(1) |
| C(13) | 1179(5) | -79(2)   | 10493(2) | 69(1) |
| C(14) | 2937(5) | 58(3)    | 10000(2) | 68(1) |
| C(15) | 393(5)  | -365(2)  | 9179(2)  | 68(1) |
| C(16) | -3(5)   | -708(3)  | 9990(2)  | 67(1) |

---

|       |          |         |          |       |
|-------|----------|---------|----------|-------|
| C(17) | -2115(6) | -760(3) | 10189(3) | 96(1) |
| C(18) | 4531(5)  | 2366(3) | 6940(2)  | 84(1) |
| C(19) | 1114(5)  | 1997(3) | 6658(2)  | 74(1) |
| C(20) | -1088(5) | 1416(3) | 8188(2)  | 81(1) |

---

Table 3. Bond lengths [Å] and angles [deg] for C<sub>20</sub>H<sub>34</sub>O<sub>2</sub>.

---

|            |          |
|------------|----------|
| O(1)-C(19) | 1.421(5) |
| O(1)-H(1O) | 0.77(4)  |
| O(2)-C(16) | 1.444(4) |
| O(2)-H(2O) | 0.86(4)  |
| C(1)-C(2)  | 1.515(5) |
| C(1)-C(10) | 1.539(5) |
| C(1)-H(1A) | 0.9700   |
| C(1)-H(1B) | 0.9700   |
| C(2)-C(3)  | 1.508(6) |
| C(2)-H(2A) | 0.9700   |
| C(2)-H(2B) | 0.9700   |
| C(3)-C(4)  | 1.529(6) |
| C(3)-H(3A) | 0.9700   |
| C(3)-H(3B) | 0.9700   |
| C(4)-C(18) | 1.543(5) |
| C(4)-C(19) | 1.544(5) |
| C(4)-C(5)  | 1.562(5) |
| C(5)-C(6)  | 1.527(5) |
| C(5)-C(10) | 1.554(5) |
| C(5)-H(5)  | 0.9800   |
| C(6)-C(7)  | 1.522(5) |
| C(6)-H(6A) | 0.9700   |
| C(6)-H(6B) | 0.9700   |
| C(7)-C(8)  | 1.519(4) |
| C(7)-H(7A) | 0.9700   |



|              |          |
|--------------|----------|
| C(7)-H(7B)   | 0.9700   |
| C(8)-C(14)   | 1.541(4) |
| C(8)-C(9)    | 1.545(5) |
| C(8)-C(15)   | 1.562(5) |
| C(9)-C(11)   | 1.534(5) |
| C(9)-C(10)   | 1.569(5) |
| C(9)-H(9)    | 0.9800   |
| C(10)-C(20)  | 1.551(5) |
| C(11)-C(12)  | 1.528(5) |
| C(11)-H(11A) | 0.9700   |
| C(11)-H(11B) | 0.9700   |
| C(12)-C(13)  | 1.528(5) |
| C(12)-H(12A) | 0.9700   |
| C(12)-H(12B) | 0.9700   |
| C(13)-C(14)  | 1.522(5) |
| C(13)-C(16)  | 1.524(5) |
| C(13)-H(13)  | 0.9800   |
| C(14)-H(14A) | 0.9700   |
| C(14)-H(14B) | 0.9700   |
| C(15)-C(16)  | 1.537(5) |
| C(15)-H(15A) | 0.9700   |
| C(15)-H(15B) | 0.9700   |
| C(16)-C(17)  | 1.526(5) |
| C(17)-H(17A) | 0.9600   |
| C(17)-H(17B) | 0.9600   |
| C(17)-H(17C) | 0.9600   |
| C(18)-H(18A) | 0.9600   |
| C(18)-H(18B) | 0.9600   |
| C(18)-H(18C) | 0.9600   |

|                  |          |
|------------------|----------|
| C(19)-H(19A)     | 0.9700   |
| C(19)-H(19B)     | 0.9700   |
| C(20)-H(20A)     | 0.9600   |
| C(20)-H(20B)     | 0.9600   |
| C(20)-H(20C)     | 0.9600   |
|                  |          |
| C(19)-O(1)-H(1O) | 110(3)   |
| C(16)-O(2)-H(2O) | 110(3)   |
| C(2)-C(1)-C(10)  | 113.8(3) |
| C(2)-C(1)-H(1A)  | 108.8    |
| C(10)-C(1)-H(1A) | 108.8    |
| C(2)-C(1)-H(1B)  | 108.8    |
| C(10)-C(1)-H(1B) | 108.8    |
| H(1A)-C(1)-H(1B) | 107.7    |
| C(3)-C(2)-C(1)   | 111.8(3) |
| C(3)-C(2)-H(2A)  | 109.3    |
| C(1)-C(2)-H(2A)  | 109.3    |
| C(3)-C(2)-H(2B)  | 109.3    |
| C(1)-C(2)-H(2B)  | 109.3    |
| H(2A)-C(2)-H(2B) | 107.9    |
| C(2)-C(3)-C(4)   | 115.0(3) |
| C(2)-C(3)-H(3A)  | 108.5    |
| C(4)-C(3)-H(3A)  | 108.5    |
| C(2)-C(3)-H(3B)  | 108.5    |
| C(4)-C(3)-H(3B)  | 108.5    |
| H(3A)-C(3)-H(3B) | 107.5    |
| C(3)-C(4)-C(18)  | 107.1(3) |
| C(3)-C(4)-C(19)  | 110.4(3) |
| C(18)-C(4)-C(19) | 108.8(3) |

|                  |          |
|------------------|----------|
| C(3)-C(4)-C(5)   | 108.9(3) |
| C(18)-C(4)-C(5)  | 109.2(3) |
| C(19)-C(4)-C(5)  | 112.3(3) |
| C(6)-C(5)-C(10)  | 110.5(3) |
| C(6)-C(5)-C(4)   | 114.8(3) |
| C(10)-C(5)-C(4)  | 117.6(3) |
| C(6)-C(5)-H(5)   | 104.0    |
| C(10)-C(5)-H(5)  | 104.0    |
| C(4)-C(5)-H(5)   | 104.0    |
| C(7)-C(6)-C(5)   | 110.2(3) |
| C(7)-C(6)-H(6A)  | 109.6    |
| C(5)-C(6)-H(6A)  | 109.6    |
| C(7)-C(6)-H(6B)  | 109.6    |
| C(5)-C(6)-H(6B)  | 109.6    |
| H(6A)-C(6)-H(6B) | 108.1    |
| C(8)-C(7)-C(6)   | 114.8(3) |
| C(8)-C(7)-H(7A)  | 108.6    |
| C(6)-C(7)-H(7A)  | 108.6    |
| C(8)-C(7)-H(7B)  | 108.6    |
| C(6)-C(7)-H(7B)  | 108.6    |
| H(7A)-C(7)-H(7B) | 107.6    |
| C(7)-C(8)-C(14)  | 109.9(2) |
| C(7)-C(8)-C(9)   | 110.5(3) |
| C(14)-C(8)-C(9)  | 108.2(3) |
| C(7)-C(8)-C(15)  | 115.0(3) |
| C(14)-C(8)-C(15) | 100.1(3) |
| C(9)-C(8)-C(15)  | 112.5(3) |
| C(11)-C(9)-C(8)  | 110.3(3) |
| C(11)-C(9)-C(10) | 113.8(3) |

|                     |          |
|---------------------|----------|
| C(8)-C(9)-C(10)     | 116.0(3) |
| C(11)-C(9)-H(9)     | 105.2    |
| C(8)-C(9)-H(9)      | 105.2    |
| C(10)-C(9)-H(9)     | 105.2    |
| C(1)-C(10)-C(20)    | 108.2(3) |
| C(1)-C(10)-C(5)     | 108.2(3) |
| C(20)-C(10)-C(5)    | 112.1(3) |
| C(1)-C(10)-C(9)     | 108.7(3) |
| C(20)-C(10)-C(9)    | 112.9(3) |
| C(5)-C(10)-C(9)     | 106.7(3) |
| C(12)-C(11)-C(9)    | 113.7(3) |
| C(12)-C(11)-H(11A)  | 108.8    |
| C(9)-C(11)-H(11A)   | 108.8    |
| C(12)-C(11)-H(11B)  | 108.8    |
| C(9)-C(11)-H(11B)   | 108.8    |
| H(11A)-C(11)-H(11B) | 107.7    |
| C(13)-C(12)-C(11)   | 114.1(3) |
| C(13)-C(12)-H(12A)  | 108.7    |
| C(11)-C(12)-H(12A)  | 108.7    |
| C(13)-C(12)-H(12B)  | 108.7    |
| C(11)-C(12)-H(12B)  | 108.7    |
| H(12A)-C(12)-H(12B) | 107.6    |
| C(14)-C(13)-C(16)   | 101.1(3) |
| C(14)-C(13)-C(12)   | 108.4(3) |
| C(16)-C(13)-C(12)   | 115.0(3) |
| C(14)-C(13)-H(13)   | 110.7    |
| C(16)-C(13)-H(13)   | 110.7    |
| C(12)-C(13)-H(13)   | 110.7    |
| C(13)-C(14)-C(8)    | 101.9(3) |

|                     |          |
|---------------------|----------|
| C(13)-C(14)-H(14A)  | 111.4    |
| C(8)-C(14)-H(14A)   | 111.4    |
| C(13)-C(14)-H(14B)  | 111.4    |
| C(8)-C(14)-H(14B)   | 111.4    |
| H(14A)-C(14)-H(14B) | 109.3    |
| C(16)-C(15)-C(8)    | 107.2(3) |
| C(16)-C(15)-H(15A)  | 110.3    |
| C(8)-C(15)-H(15A)   | 110.3    |
| C(16)-C(15)-H(15B)  | 110.3    |
| C(8)-C(15)-H(15B)   | 110.3    |
| H(15A)-C(15)-H(15B) | 108.5    |
| O(2)-C(16)-C(13)    | 106.2(3) |
| O(2)-C(16)-C(17)    | 107.8(3) |
| C(13)-C(16)-C(17)   | 115.3(3) |
| O(2)-C(16)-C(15)    | 109.3(3) |
| C(13)-C(16)-C(15)   | 103.9(3) |
| C(17)-C(16)-C(15)   | 113.9(3) |
| C(16)-C(17)-H(17A)  | 109.5    |
| C(16)-C(17)-H(17B)  | 109.5    |
| H(17A)-C(17)-H(17B) | 109.5    |
| C(16)-C(17)-H(17C)  | 109.5    |
| H(17A)-C(17)-H(17C) | 109.5    |
| H(17B)-C(17)-H(17C) | 109.5    |
| C(4)-C(18)-H(18A)   | 109.5    |
| C(4)-C(18)-H(18B)   | 109.5    |
| H(18A)-C(18)-H(18B) | 109.5    |
| C(4)-C(18)-H(18C)   | 109.5    |
| H(18A)-C(18)-H(18C) | 109.5    |
| H(18B)-C(18)-H(18C) | 109.5    |

|                     |          |
|---------------------|----------|
| O(1)-C(19)-C(4)     | 112.8(3) |
| O(1)-C(19)-H(19A)   | 109.0    |
| C(4)-C(19)-H(19A)   | 109.0    |
| O(1)-C(19)-H(19B)   | 109.0    |
| C(4)-C(19)-H(19B)   | 109.0    |
| H(19A)-C(19)-H(19B) | 107.8    |
| C(10)-C(20)-H(20A)  | 109.5    |
| C(10)-C(20)-H(20B)  | 109.5    |
| H(20A)-C(20)-H(20B) | 109.5    |
| C(10)-C(20)-H(20C)  | 109.5    |
| H(20A)-C(20)-H(20C) | 109.5    |
| H(20B)-C(20)-H(20C) | 109.5    |

---

Symmetry transformations used to generate equivalent atoms:

Table 4. Anisotropic displacement parameters ( $\text{Å}^2 \times 10^3$ ) for C20H34O2.

The anisotropic displacement factor exponent takes the form:

$$-2 \pi^2 [ h^2 a^{*2} U_{11} + \dots + 2 h k a^* b^* U_{12} ]$$

---

|       | U11    | U22    | U33    | U23   | U13    | U12   |
|-------|--------|--------|--------|-------|--------|-------|
| O(1)  | 72(2)  | 96(2)  | 68(2)  | 2(2)  | -7(1)  | 20(2) |
| O(2)  | 71(2)  | 70(2)  | 82(2)  | 2(1)  | -15(1) | -3(1) |
| C(1)  | 90(3)  | 69(2)  | 84(2)  | -4(2) | 3(2)   | 15(2) |
| C(2)  | 100(3) | 74(2)  | 91(3)  | -3(2) | -7(2)  | 22(2) |
| C(3)  | 93(3)  | 73(2)  | 76(2)  | 6(2)  | -15(2) | -1(2) |
| C(4)  | 57(2)  | 84(3)  | 70(2)  | -2(2) | -11(2) | -1(2) |
| C(5)  | 53(2)  | 70(2)  | 69(2)  | -4(2) | -8(2)  | 1(2)  |
| C(6)  | 66(2)  | 84(2)  | 71(2)  | -5(2) | 1(2)   | 11(2) |
| C(7)  | 56(2)  | 70(2)  | 82(2)  | 3(2)  | 5(2)   | 9(2)  |
| C(8)  | 49(2)  | 72(2)  | 65(2)  | -8(2) | -8(2)  | 7(2)  |
| C(9)  | 60(2)  | 64(2)  | 67(2)  | -7(2) | -7(2)  | 3(2)  |
| C(10) | 55(2)  | 69(2)  | 67(2)  | -5(2) | -2(2)  | 8(2)  |
| C(11) | 91(3)  | 75(2)  | 79(2)  | -8(2) | 11(2)  | 22(2) |
| C(12) | 92(3)  | 83(3)  | 69(2)  | -8(2) | 2(2)   | 7(2)  |
| C(13) | 66(2)  | 78(2)  | 62(2)  | -1(2) | -11(2) | 0(2)  |
| C(14) | 55(2)  | 74(2)  | 76(2)  | -5(2) | -15(2) | 0(2)  |
| C(15) | 55(2)  | 74(2)  | 77(2)  | -5(2) | -11(2) | 1(2)  |
| C(16) | 51(2)  | 75(2)  | 74(2)  | -5(2) | -7(2)  | -2(2) |
| C(17) | 55(2)  | 113(3) | 120(4) | 2(3)  | 4(2)   | -1(2) |

C(18) 60(2) 105(3) 88(2) 8(2) -9(2) -5(2)

C(19) 60(2) 92(3) 70(2) -3(2) -10(2) -1(2)

C(20) 53(2) 107(3) 82(2) 8(2) -7(2) 8(2)

---



Table 5. Hydrogen coordinates ( $\times 10^4$ ) and isotropic displacement parameters ( $\text{\AA}^2 \times 10^3$ ) for C<sub>20</sub>H<sub>34</sub>O<sub>2</sub>.

---

|        | x     | y    | z     | U(eq) |
|--------|-------|------|-------|-------|
| H(1A)  | -758  | 2896 | 8999  | 97    |
| H(1B)  | 1444  | 3061 | 9021  | 97    |
| H(2A)  | -856  | 3236 | 7712  | 106   |
| H(2B)  | 109   | 4049 | 8145  | 106   |
| H(3A)  | 3079  | 3585 | 7768  | 97    |
| H(3B)  | 1801  | 3677 | 7042  | 97    |
| H(5)   | 3558  | 1962 | 8304  | 76    |
| H(6A)  | 1887  | 423  | 7642  | 88    |
| H(6B)  | 4024  | 692  | 7503  | 88    |
| H(7A)  | 3778  | -367 | 8505  | 84    |
| H(7B)  | 4709  | 542  | 8786  | 84    |
| H(9)   | 2414  | 1680 | 9502  | 76    |
| H(11A) | -367  | 2030 | 10068 | 98    |
| H(11B) | -1393 | 1174 | 9729  | 98    |
| H(12A) | 1166  | 1209 | 10955 | 98    |
| H(12B) | -864  | 768  | 10943 | 98    |
| H(13)  | 1515  | -384 | 10971 | 82    |
| H(14A) | 3664  | -502 | 9952  | 82    |
| H(14B) | 3751  | 534  | 10203 | 82    |
| H(15A) | -735  | -79  | 8969  | 82    |

---

|        |          |           |          |        |
|--------|----------|-----------|----------|--------|
| H(15B) | 754      | -869      | 8852     | 82     |
| H(17A) | -2744    | -1167     | 9843     | 144    |
| H(17B) | -2671    | -164      | 10150    | 144    |
| H(17C) | -2258    | -983      | 10700    | 144    |
| H(18A) | 4852     | 1772      | 6748     | 126    |
| H(18B) | 5419     | 2536      | 7330     | 126    |
| H(18C) | 4585     | 2802      | 6533     | 126    |
| H(19A) | 1258     | 1342      | 6608     | 89     |
| H(19B) | -182     | 2118      | 6820     | 89     |
| H(20A) | -2055    | 1368      | 8572     | 121    |
| H(20B) | -824     | 822       | 7984     | 121    |
| H(20C) | -1522    | 1810      | 7788     | 121    |
| H(20)  | 350(70)  | -1970(30) | 9740(20) | 97(15) |
| H(10)  | 2200(60) | 2150(30)  | 5720(30) | 87(15) |

---

Table 6. Torsion angles [deg] for C<sub>20</sub>H<sub>34</sub>O<sub>2</sub>.

---

|                       |           |
|-----------------------|-----------|
| C(10)-C(1)-C(2)-C(3)  | -56.2(5)  |
| C(1)-C(2)-C(3)-C(4)   | 54.7(5)   |
| C(2)-C(3)-C(4)-C(18)  | -166.8(3) |
| C(2)-C(3)-C(4)-C(19)  | 74.9(4)   |
| C(2)-C(3)-C(4)-C(5)   | -48.8(4)  |
| C(3)-C(4)-C(5)-C(6)   | -179.7(3) |
| C(18)-C(4)-C(5)-C(6)  | -63.0(4)  |
| C(19)-C(4)-C(5)-C(6)  | 57.8(4)   |
| C(3)-C(4)-C(5)-C(10)  | 47.7(4)   |
| C(18)-C(4)-C(5)-C(10) | 164.4(3)  |
| C(19)-C(4)-C(5)-C(10) | -74.8(4)  |
| C(10)-C(5)-C(6)-C(7)  | -61.9(4)  |
| C(4)-C(5)-C(6)-C(7)   | 162.2(3)  |
| C(5)-C(6)-C(7)-C(8)   | 55.7(4)   |
| C(6)-C(7)-C(8)-C(14)  | -166.8(3) |
| C(6)-C(7)-C(8)-C(9)   | -47.4(4)  |
| C(6)-C(7)-C(8)-C(15)  | 81.2(4)   |
| C(7)-C(8)-C(9)-C(11)  | 178.9(3)  |
| C(14)-C(8)-C(9)-C(11) | -60.7(4)  |
| C(15)-C(8)-C(9)-C(11) | 48.9(4)   |
| C(7)-C(8)-C(9)-C(10)  | 47.7(4)   |
| C(14)-C(8)-C(9)-C(10) | 168.1(3)  |
| C(15)-C(8)-C(9)-C(10) | -82.3(4)  |
| C(2)-C(1)-C(10)-C(20) | -69.7(4)  |
| C(2)-C(1)-C(10)-C(5)  | 52.0(4)   |

|                         |           |
|-------------------------|-----------|
| C(2)-C(1)-C(10)-C(9)    | 167.5(4)  |
| C(6)-C(5)-C(10)-C(1)    | 176.2(3)  |
| C(4)-C(5)-C(10)-C(1)    | -49.3(4)  |
| C(6)-C(5)-C(10)-C(20)   | -64.6(4)  |
| C(4)-C(5)-C(10)-C(20)   | 69.9(4)   |
| C(6)-C(5)-C(10)-C(9)    | 59.4(3)   |
| C(4)-C(5)-C(10)-C(9)    | -166.1(3) |
| C(11)-C(9)-C(10)-C(1)   | 60.3(4)   |
| C(8)-C(9)-C(10)-C(1)    | -170.1(3) |
| C(11)-C(9)-C(10)-C(20)  | -59.7(4)  |
| C(8)-C(9)-C(10)-C(20)   | 69.9(4)   |
| C(11)-C(9)-C(10)-C(5)   | 176.8(3)  |
| C(8)-C(9)-C(10)-C(5)    | -53.7(4)  |
| C(8)-C(9)-C(11)-C(12)   | 42.6(4)   |
| C(10)-C(9)-C(11)-C(12)  | 174.9(3)  |
| C(9)-C(11)-C(12)-C(13)  | -40.9(5)  |
| C(11)-C(12)-C(13)-C(14) | 55.9(4)   |
| C(11)-C(12)-C(13)-C(16) | -56.4(5)  |
| C(16)-C(13)-C(14)-C(8)  | 51.1(3)   |
| C(12)-C(13)-C(14)-C(8)  | -70.2(3)  |
| C(7)-C(8)-C(14)-C(13)   | -165.2(3) |
| C(9)-C(8)-C(14)-C(13)   | 74.0(3)   |
| C(15)-C(8)-C(14)-C(13)  | -43.8(3)  |
| C(7)-C(8)-C(15)-C(16)   | 138.7(3)  |
| C(14)-C(8)-C(15)-C(16)  | 21.0(3)   |
| C(9)-C(8)-C(15)-C(16)   | -93.7(3)  |
| C(14)-C(13)-C(16)-O(2)  | 78.6(3)   |
| C(12)-C(13)-C(16)-O(2)  | -164.9(3) |
| C(14)-C(13)-C(16)-C(17) | -162.0(4) |

|                         |           |
|-------------------------|-----------|
| C(12)-C(13)-C(16)-C(17) | -45.5(5)  |
| C(14)-C(13)-C(16)-C(15) | -36.6(3)  |
| C(12)-C(13)-C(16)-C(15) | 79.8(4)   |
| C(8)-C(15)-C(16)-O(2)   | -103.7(3) |
| C(8)-C(15)-C(16)-C(13)  | 9.4(4)    |
| C(8)-C(15)-C(16)-C(17)  | 135.7(3)  |
| C(3)-C(4)-C(19)-O(1)    | 71.9(4)   |
| C(18)-C(4)-C(19)-O(1)   | -45.3(5)  |
| C(5)-C(4)-C(19)-O(1)    | -166.4(3) |

---

Symmetry transformations used to generate equivalent atoms:

Table 7. Hydrogen bonds for C<sub>20</sub>H<sub>34</sub>O<sub>2</sub> [A and deg.].

---

| D-H...A             | d(D-H)  | d(H...A) | d(D...A) | <(DHA) |
|---------------------|---------|----------|----------|--------|
| O(1)-H(10)...O(2)#1 | 0.77(4) | 1.97(4)  | 2.736(4) | 173(4) |
| O(2)-H(20)...O(1)#2 | 0.86(4) | 1.94(5)  | 2.770(4) | 161(4) |

---

Symmetry transformations used to generate equivalent atoms:

#1  $-x+1/2, -y, z-1/2$  #2  $-x, y-1/2, -z+3/2$

Institution:  
Protocol: 202\_00010650 513.PRO  
Listmode Replay: New Protocol  
Analysis Date: 03-May-2012, 13:06:47  
Settings File: 00Ciclo Celular de Javi.PRO, 03-May-2012, 10:53:20  
Listmode File: 01\_00010676 539.LMD

Run Date: 03-May-12, 11:51:48  
Sample ID: Well 01  
User ID: anajavi  
Acquisition Time/Events: 58.8s / 10000 (UNKNOWN)  
Instrument SN: AL01002 Software Version: CXP v2.2

(F1)[Ungated] 01\_00010676 539.LMD : FS Lin/SS Lin - ADC

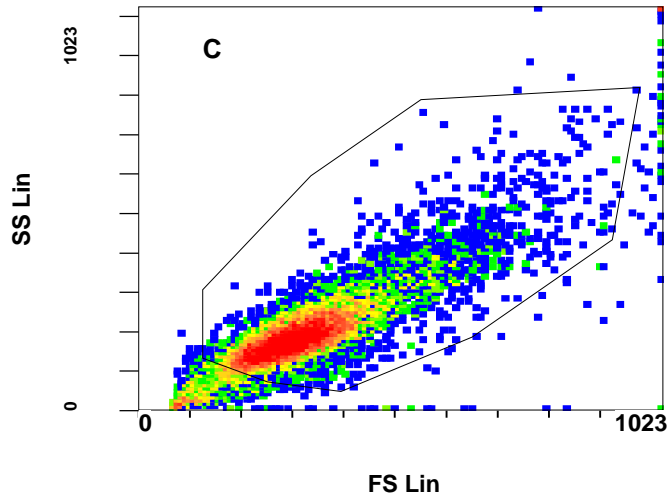

(F1)[Ungated] 01\_00010676 539.LMD : FL3 Lin/AUX - ADC

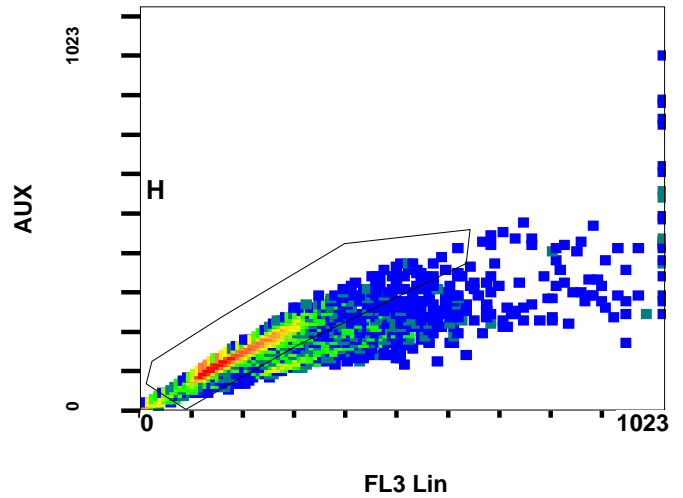

(F1)[H] 01\_00010676 539.LMD : FL3 Lin - ADC

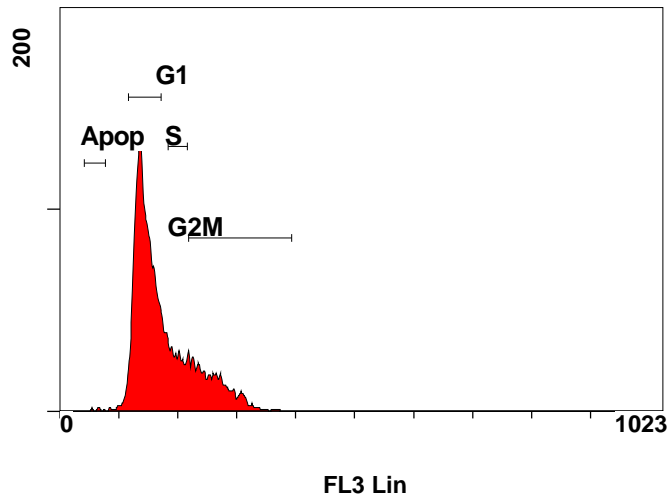

(F1)[H] 01\_00010676 539.LMD : FL3 Lin/SS Lin - ADC

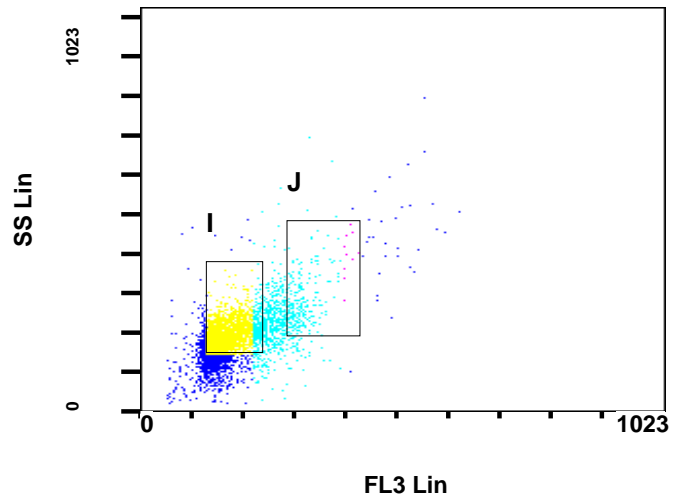

**Statistical Analysis**

**PROGRAM INFORMATION**

| File:- 01_00010676 539.LMD       |        |        |        |        |        |        |
|----------------------------------|--------|--------|--------|--------|--------|--------|
| Gate:- H [H]                     |        |        |        |        |        |        |
| Compensation:- Advanced          |        |        |        |        |        |        |
| Filename:- 01_00010676 539.LMD   |        |        |        |        |        |        |
| Mean Calculation Method:-LOG-LOG |        |        |        |        |        |        |
| Region                           | Number | %Total | %Gated | X-Mean | X-HPCV | Y-Mean |
| ALL                              | 8499   | 84.99  | 100.00 | 181    | 8.13   | ###    |
| ALL                              | 8499   | 84.99  | 100.00 | 181    | 8.13   | 189    |
| Apop                             | 68     | 0.68   | 0.80   | 62.9   | 2.25   | ###    |
| G1                               | 4704   | 47.04  | 55.35  | 143    | 8.13   | ###    |
| G2M                              | 1943   | 19.43  | 22.86  | 266    | 0.56   | ###    |
| I                                | 4729   | 47.29  | 55.64  | 168    | 8.47   | 195    |
| J                                | 469    | 4.69   | 5.52   | 320    | 0.24   | 284    |
| S                                | 968    | 9.68   | 11.39  | 199    | 1.85   | ###    |

| File:- 01_00010676 539.LMD       |        |        |        |        |        |        |
|----------------------------------|--------|--------|--------|--------|--------|--------|
| Gate:- Ungated                   |        |        |        |        |        |        |
| Compensation:- Advanced          |        |        |        |        |        |        |
| Filename:- 01_00010676 539.LMD   |        |        |        |        |        |        |
| Mean Calculation Method:-LOG-LOG |        |        |        |        |        |        |
| Region                           | Number | %Total | %Gated | X-Mean | X-HPCV | Y-Mean |
| ALL                              | 10000  | 100.00 | 100.00 | 195    | 8.13   | 132    |
| ALL                              | 10000  | 100.00 | 100.00 | 333    | 10.51  | 202    |
| C                                | 9083   | 90.83  | 90.83  | 344    | 10.53  | 210    |
| H                                | 8499   | 84.99  | 84.99  | 181    | 8.13   | 135    |



Institution:

Run Date: 03-May-12, 11:51:48

Protocol: 202\_00010650 513.PRO

Sample ID: Well 01

Listmode Replay: New Protocol

User ID: anajavi

Analysis Date: 03-May-2012, 13:06:47

Acquisition Time/Events: 58.8s / 10000 (UNKNOWN)

Settings File: 00Ciclo Celular de Javi.PRO, 03-May-2012, 10:53:20

Tube ID: NoRead

Listmode File: 01\_00010676 539.LMD

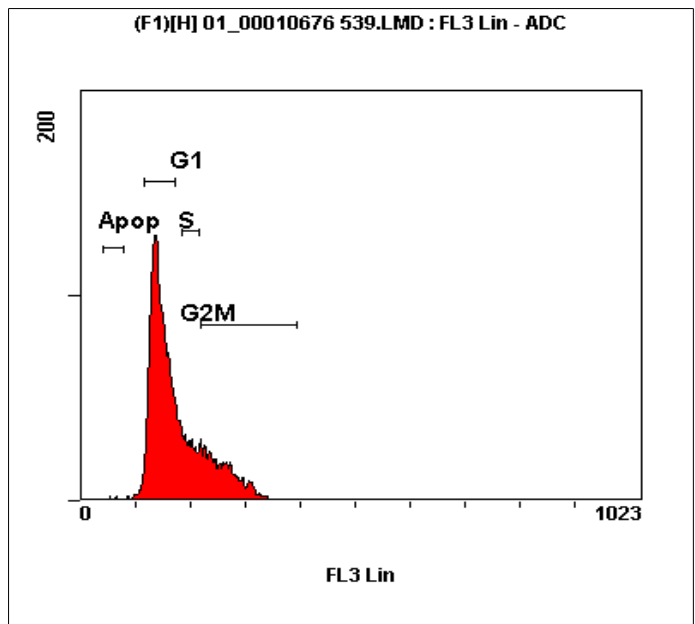

| (F1)[H] 01_00010676 539.LMD : FL3 Lin |        |        |        |        |         |       |
|---------------------------------------|--------|--------|--------|--------|---------|-------|
| Region                                | Number | %Total | %Gated | X-Mean | HP X-CV | Y-Mea |
| ALL                                   | 8499   | 84.99  | 100.00 | 181    | 8.13    | ###   |
| Apop                                  | 68     | 0.68   | 0.80   | 62.9   | 2.25    | ###   |
| G1                                    | 4704   | 47.04  | 55.35  | 143    | 8.13    | ###   |
| G2M                                   | 1943   | 19.43  | 22.86  | 266    | 0.56    | ###   |
| S                                     | 968    | 9.68   | 11.39  | 199    | 1.85    | ###   |

Institution:  
Protocol: 202\_00010650 513.PRO  
Listmode Replay: New Protocol  
Analysis Date: 03-May-2012, 13:07:30  
Settings File: 00Ciclo Celular de Javi.PRO, 03-May-2012, 10:53:20  
Listmode File: 02\_00010677 540.LMD

Run Date: 03-May-12, 11:53:22  
Sample ID: Well 02  
User ID: anajavi  
Acquisition Time/Events: 78.1s / 10000 (UNKNOWN)  
Instrument SN: AL01002 Software Version: CXP v2.2

(F1)[Ungated] 02\_00010677 540.LMD : FS Lin/SS Lin - ADC

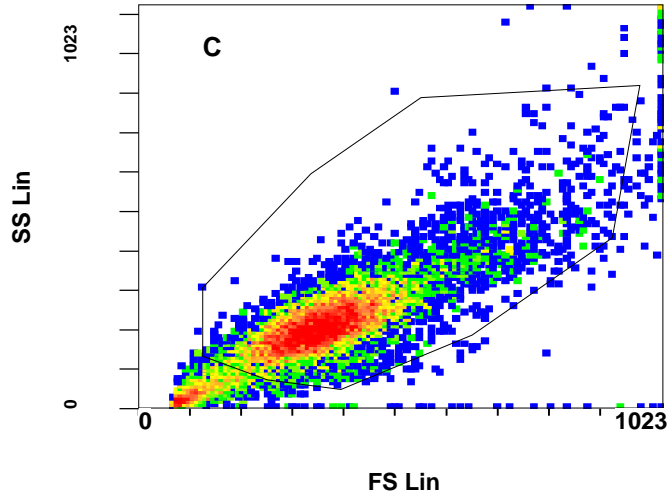

(F1)[Ungated] 02\_00010677 540.LMD : FL3 Lin/AUX - ADC

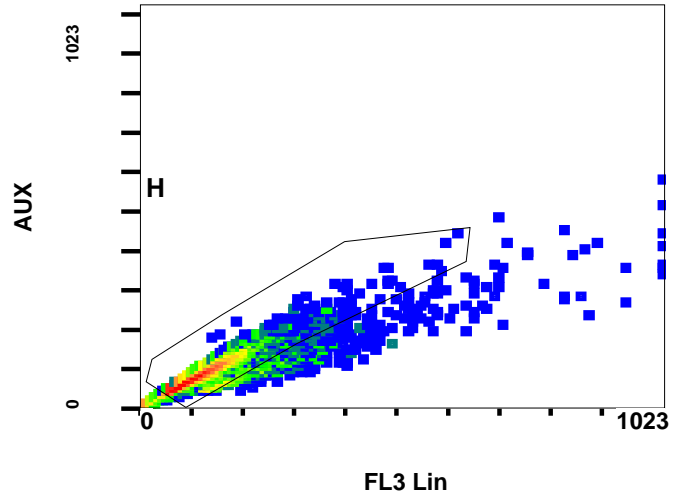

(F1)[H] 02\_00010677 540.LMD : FL3 Lin - ADC

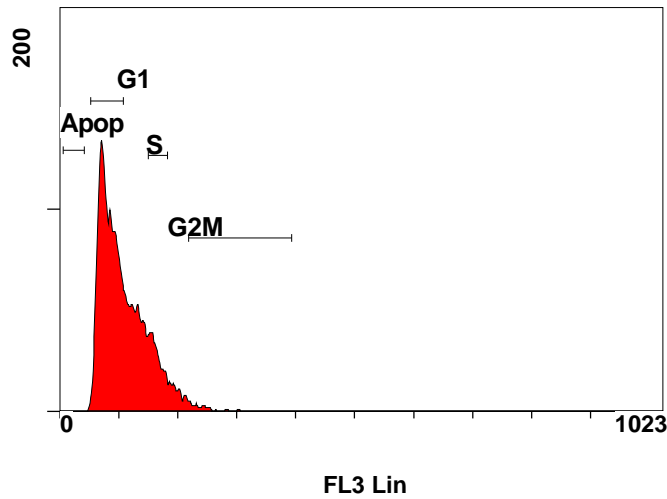

(F1)[H] 02\_00010677 540.LMD : FL3 Lin/SS Lin - ADC

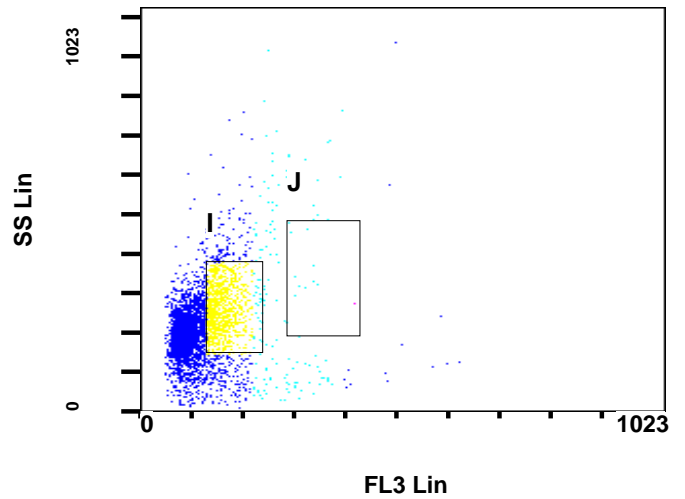

**Statistical Analysis**

**PROGRAM INFORMATION**

| File:- 02_00010677 540.LMD       |        |        |        |        |        |        |
|----------------------------------|--------|--------|--------|--------|--------|--------|
| Gate:- H [H]                     |        |        |        |        |        |        |
| Compensation:- Advanced          |        |        |        |        |        |        |
| Filename:- 02_00010677 540.LMD   |        |        |        |        |        |        |
| Mean Calculation Method:-LOG-LOG |        |        |        |        |        |        |
| Region                           | Number | %Total | %Gated | X-Mean | X-HPCV | Y-Mean |
| ALL                              | 8766   | 87.66  | 100.00 | 115    | 20.83  | ###    |
| ALL                              | 8766   | 87.66  | 100.00 | 115    | 20.83  | 218    |
| Apop                             | 0      | 0.00   | 0.00   | 0      | 0.00   | ###    |
| G1                               | 4829   | 48.29  | 55.09  | 80.9   | 20.83  | ###    |
| G2M                              | 319    | 3.19   | 3.64   | 271    | 0.54   | ###    |
| I                                | 1959   | 19.59  | 22.35  | 159    | 6.18   | 261    |
| J                                | 20     | 0.20   | 0.23   | 331    | 0.14   | 337    |
| S                                | 1006   | 10.06  | 11.48  | 164    | 5.95   | ###    |

| File:- 02_00010677 540.LMD       |        |        |        |        |        |        |
|----------------------------------|--------|--------|--------|--------|--------|--------|
| Gate:- Ungated                   |        |        |        |        |        |        |
| Compensation:- Advanced          |        |        |        |        |        |        |
| Filename:- 02_00010677 540.LMD   |        |        |        |        |        |        |
| Mean Calculation Method:-LOG-LOG |        |        |        |        |        |        |
| Region                           | Number | %Total | %Gated | X-Mean | X-HPCV | Y-Mean |
| ALL                              | 10000  | 100.00 | 100.00 | 370    | 0.00   | 215    |
| ALL                              | 10000  | 100.00 | 100.00 | 117    | ###    | 79.9   |
| C                                | 8769   | 87.69  | 87.69  | 390    | 9.87   | 230    |
| H                                | 8766   | 87.66  | 87.66  | 115    | 20.83  | 83.3   |

Institution:

Run Date: 03-May-12, 11:53:22

Protocol: 202\_00010650 513.PRO

Sample ID: Well 02

Listmode Replay: New Protocol

User ID: anajavi

Analysis Date: 03-May-2012, 13:07:31

Acquisition Time/Events: 78.1s / 10000 (UNKNOWN)

Settings File: 00Ciclo Celular de Javi.PRO, 03-May-2012, 10:53:20

Tube ID: NoRead

Listmode File: 02\_00010677 540.LMD

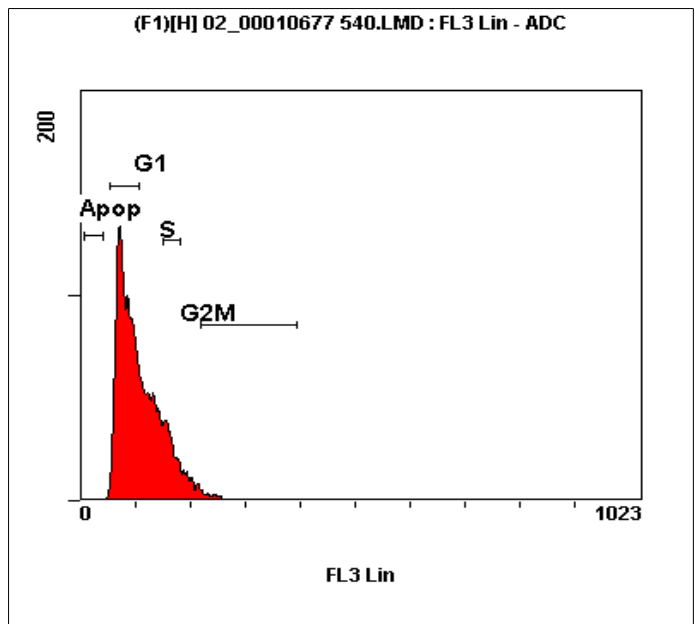

| (F1)[H] 02_00010677 540.LMD : FL3 Lin |        |        |        |        |         |       |
|---------------------------------------|--------|--------|--------|--------|---------|-------|
| Region                                | Number | %Total | %Gated | X-Mean | HP X-CV | Y-Mea |
| ALL                                   | 8766   | 87.66  | 100.00 | 115    | 20.83   | ###   |
| Apop                                  | 0      | 0.00   | 0.00   | 0      | 0.00    | ###   |
| G1                                    | 4829   | 48.29  | 55.09  | 80.9   | 20.83   | ###   |
| G2M                                   | 319    | 3.19   | 3.64   | 271    | 0.54    | ###   |
| S                                     | 1006   | 10.06  | 11.48  | 164    | 5.95    | ###   |

Institution:  
Protocol: 202\_00010650 513.PRO  
Listmode Replay: New Protocol  
Analysis Date: 03-May-2012, 13:20:43  
Settings File: 00Ciclo Celular de Javi.PRO, 03-May-2012, 10:53:20  
Listmode File: 21\_00010670 533.LMD

Run Date: 03-May-12, 11:32:28  
Sample ID: Well 21  
User ID: anajavi  
Acquisition Time/Events: 65.9s / 10000 (UNKNOWN)  
Instrument SN: AL01002 Software Version: CXP v2.2

(F1)[Ungated] 21\_00010670 533.LMD : FS Lin/SS Lin - ADC

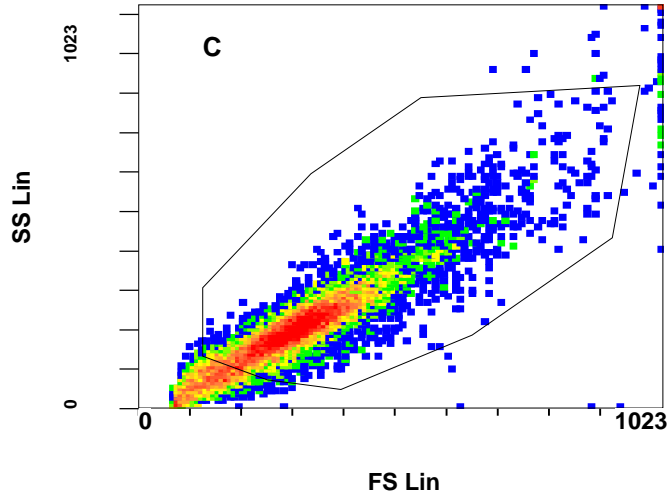

(F1)[Ungated] 21\_00010670 533.LMD : FL3 Lin/AUX - ADC

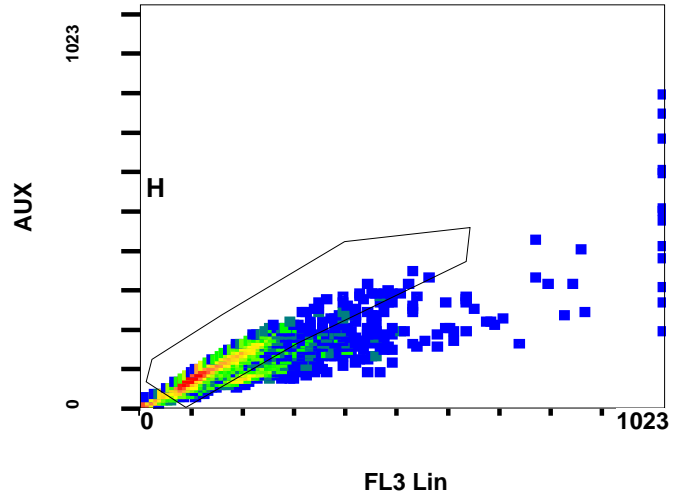

(F1)[H] 21\_00010670 533.LMD : FL3 Lin - ADC

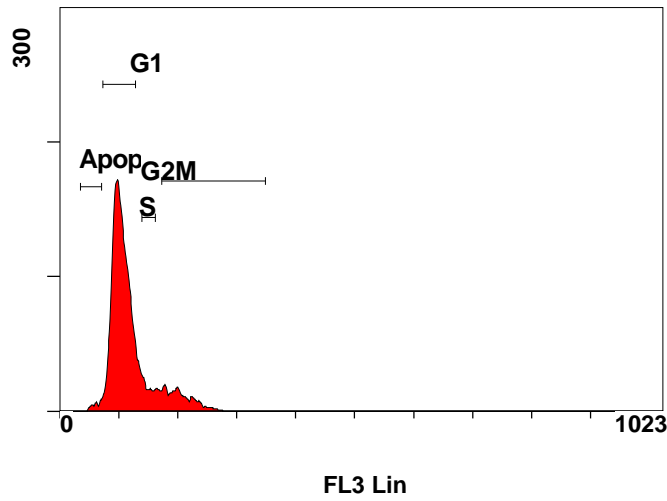

(F1)[H] 21\_00010670 533.LMD : FL3 Lin/SS Lin - ADC

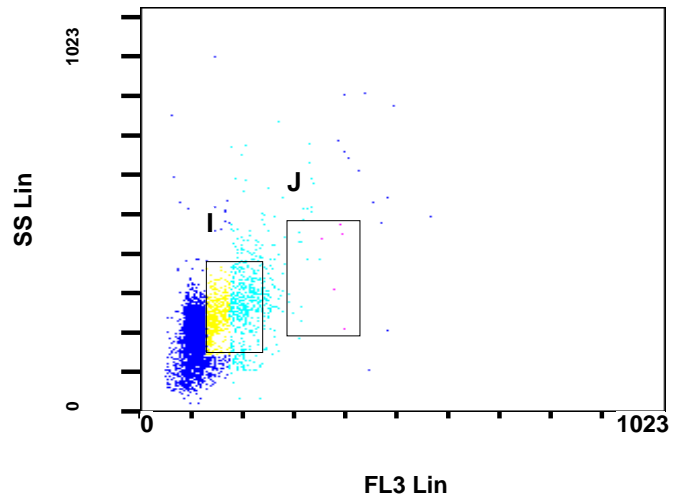

**Statistical Analysis**

**PROGRAM INFORMATION**

| File:- 21_00010670 533.LMD       |        |        |        |        |        |        |
|----------------------------------|--------|--------|--------|--------|--------|--------|
| Gate:- H [H]                     |        |        |        |        |        |        |
| Compensation:- Advanced          |        |        |        |        |        |        |
| Filename:- 21_00010670 533.LMD   |        |        |        |        |        |        |
| Mean Calculation Method:-LOG-LOG |        |        |        |        |        |        |
| Region                           | Number | %Total | %Gated | X-Mean | X-HPCV | Y-Mean |
| ALL                              | 8076   | 80.76  | 100.00 | 124    | 11.80  | ###    |
| ALL                              | 8076   | 80.76  | 100.00 | 124    | 11.80  | 207    |
| Apop                             | 171    | 1.71   | 2.12   | 60.9   | 3.08   | ###    |
| G1                               | 5688   | 56.88  | 70.43  | 103    | 11.80  | ###    |
| G2M                              | 1149   | 11.49  | 14.23  | 213    | 2.18   | ###    |
| I                                | 1653   | 16.53  | 20.47  | 171    | 0.65   | 256    |
| J                                | 34     | 0.34   | 0.42   | 331    | 0.14   | 346    |
| S                                | 478    | 4.78   | 5.92   | 149    | 2.15   | ###    |

| File:- 21_00010670 533.LMD       |        |        |        |        |        |        |
|----------------------------------|--------|--------|--------|--------|--------|--------|
| Gate:- Ungated                   |        |        |        |        |        |        |
| Compensation:- Advanced          |        |        |        |        |        |        |
| Filename:- 21_00010670 533.LMD   |        |        |        |        |        |        |
| Mean Calculation Method:-LOG-LOG |        |        |        |        |        |        |
| Region                           | Number | %Total | %Gated | X-Mean | X-HPCV | Y-Mean |
| ALL                              | 10000  | 100.00 | 100.00 | 310    | 5.53   | 204    |
| ALL                              | 10000  | 100.00 | 100.00 | 120    | ###    | 81.2   |
| C                                | 8284   | 82.84  | 82.84  | 338    | 5.51   | 226    |
| H                                | 8076   | 80.76  | 80.76  | 124    | 11.80  | 89.9   |

Institution:

Run Date: 03-May-12, 11:32:28

Protocol: 202\_00010650 513.PRO

Sample ID: Well 21

Listmode Replay: New Protocol

User ID: anajavi

Analysis Date: 03-May-2012, 13:20:43

Acquisition Time/Events: 65.9s / 10000 (UNKNOWN)

Settings File: 00Ciclo Celular de Javi.PRO, 03-May-2012, 10:53:20

Tube ID: NoRead

Listmode File: 21\_00010670 533.LMD

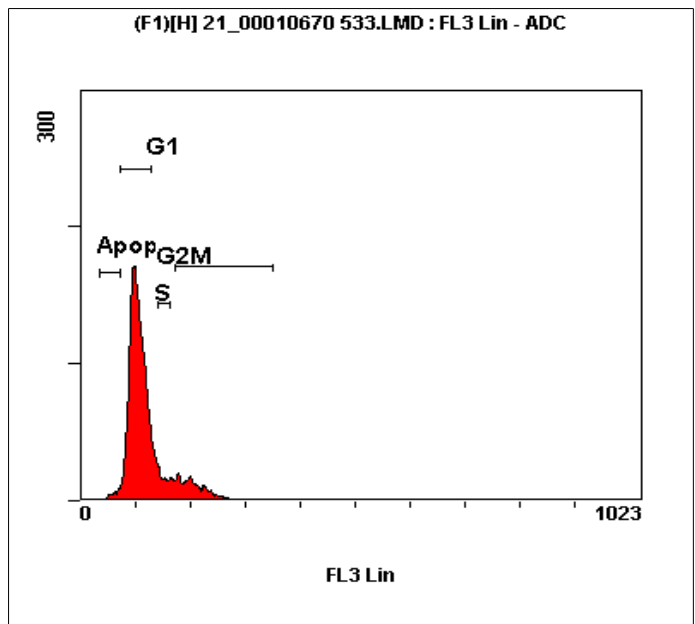

| (F1)[H] 21_00010670 533.LMD : FL3 Lin |        |        |        |        |         |       |
|---------------------------------------|--------|--------|--------|--------|---------|-------|
| Region                                | Number | %Total | %Gated | X-Mean | HP X-CV | Y-Mea |
| ALL                                   | 8076   | 80.76  | 100.00 | 124    | 11.80   | ###   |
| Apop                                  | 171    | 1.71   | 2.12   | 60.9   | 3.08    | ###   |
| G1                                    | 5688   | 56.88  | 70.43  | 103    | 11.80   | ###   |
| G2M                                   | 1149   | 11.49  | 14.23  | 213    | 2.18    | ###   |
| S                                     | 478    | 4.78   | 5.92   | 149    | 2.15    | ###   |

Institution:  
Protocol: 202\_00010650 513.PRO  
Listmode Replay: New Protocol  
Analysis Date: 03-May-2012, 13:21:18  
Settings File: 00Ciclo Celular de Javi.PRO, 03-May-2012, 10:53:20  
Listmode File: 22\_00010671 534.LMD

Run Date: 03-May-12, 11:34:10  
Sample ID: Well 22  
User ID: anajavi  
Acquisition Time/Events: 78.1s / 10000 (UNKNOWN)  
Instrument SN: AL01002 Software Version: CXP v2.2

(F1)[Ungated] 22\_00010671 534.LMD : FS Lin/SS Lin - ADC

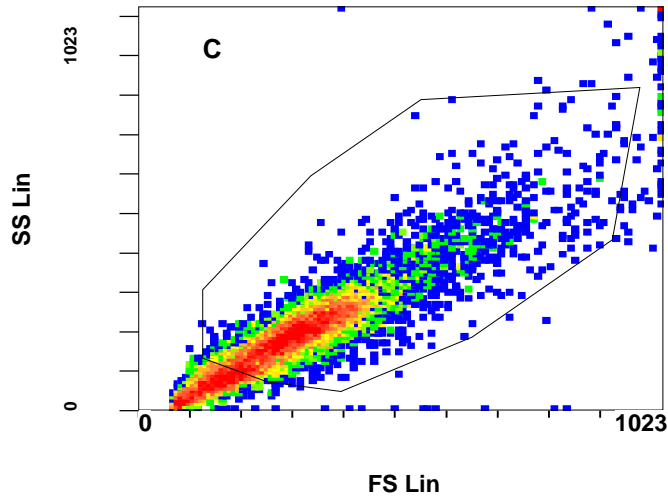

(F1)[Ungated] 22\_00010671 534.LMD : FL3 Lin/AUX - ADC

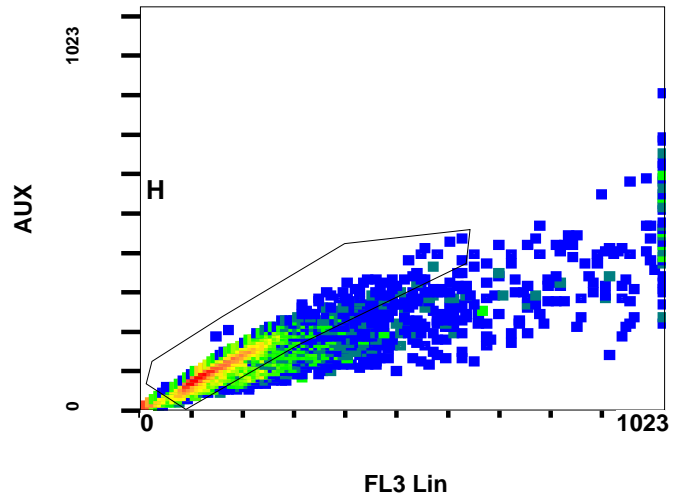

(F1)[H] 22\_00010671 534.LMD : FL3 Lin - ADC

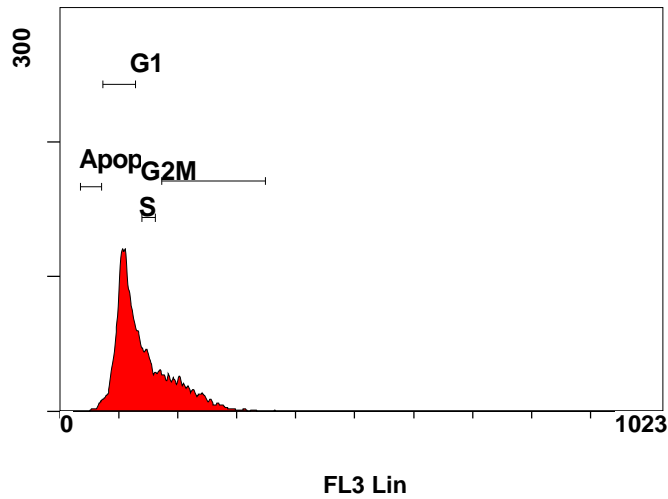

(F1)[H] 22\_00010671 534.LMD : FL3 Lin/SS Lin - ADC

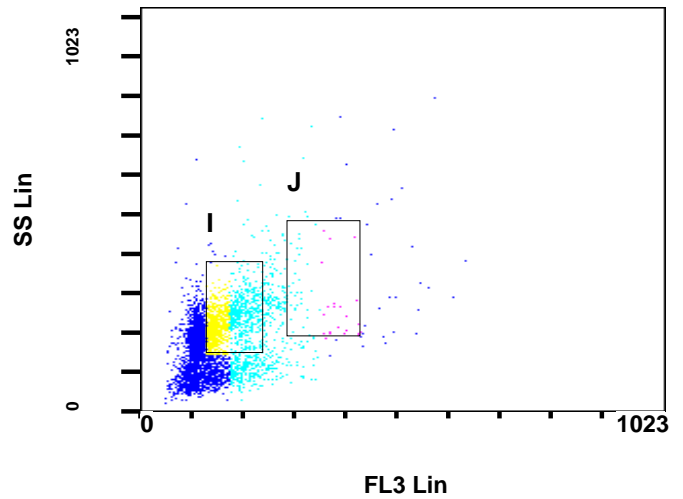



**Statistical Analysis**

**PROGRAM INFORMATION**

| File:- 22_00010671 534.LMD       |        |        |        |        |        |        |
|----------------------------------|--------|--------|--------|--------|--------|--------|
| Gate:- H [H]                     |        |        |        |        |        |        |
| Compensation:- Advanced          |        |        |        |        |        |        |
| Filename:- 22_00010671 534.LMD   |        |        |        |        |        |        |
| Mean Calculation Method:-LOG-LOG |        |        |        |        |        |        |
| Region                           | Number | %Total | %Gated | X-Mean | X-HPCV | Y-Mean |
| ALL                              | 7868   | 78.68  | 100.00 | 150    | 10.93  | ###    |
| ALL                              | 7868   | 78.68  | 100.00 | 150    | 10.93  | 183    |
| Apop                             | 115    | 1.15   | 1.46   | 62.7   | 4.82   | ###    |
| G1                               | 3758   | 37.58  | 47.76  | 107    | 10.93  | ###    |
| G2M                              | 1993   | 19.93  | 25.33  | 220    | 1.75   | ###    |
| I                                | 2240   | 22.40  | 28.47  | 171    | 4.50   | 233    |
| J                                | 122    | 1.22   | 1.55   | 339    | 0.44   | 294    |
| S                                | 980    | 9.80   | 12.46  | 149    | 4.61   | ###    |

| File:- 22_00010671 534.LMD       |        |        |        |        |        |        |
|----------------------------------|--------|--------|--------|--------|--------|--------|
| Gate:- Ungated                   |        |        |        |        |        |        |
| Compensation:- Advanced          |        |        |        |        |        |        |
| Filename:- 22_00010671 534.LMD   |        |        |        |        |        |        |
| Mean Calculation Method:-LOG-LOG |        |        |        |        |        |        |
| Region                           | Number | %Total | %Gated | X-Mean | X-HPCV | Y-Mean |
| ALL                              | 10000  | 100.00 | 100.00 | 301    | 0.00   | 187    |
| ALL                              | 10000  | 100.00 | 100.00 | 160    | ###    | 100    |
| C                                | 7513   | 75.13  | 75.13  | 342    | 5.81   | 218    |
| H                                | 7868   | 78.68  | 78.68  | 150    | 10.93  | 105    |

Institution:

Run Date: 03-May-12, 11:34:10

Protocol: 202\_00010650 513.PRO

Sample ID: Well 22

Listmode Replay: New Protocol

User ID: anajavi

Analysis Date: 03-May-2012, 13:21:18

Acquisition Time/Events: 78.1s / 10000 (UNKNOWN)

Settings File: 00Ciclo Celular de Javi.PRO, 03-May-2012, 10:53:20

Tube ID: NoRead

Listmode File: 22\_00010671 534.LMD

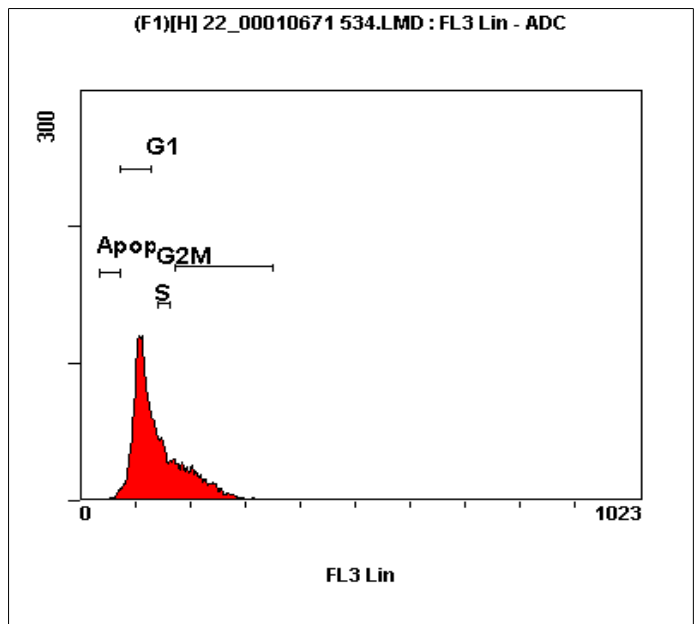

| (F1)[H] 22_00010671 534.LMD : FL3 Lin |        |        |        |        |         |       |
|---------------------------------------|--------|--------|--------|--------|---------|-------|
| Region                                | Number | %Total | %Gated | X-Mean | HP X-CV | Y-Mea |
| ALL                                   | 7868   | 78.68  | 100.00 | 150    | 10.93   | ###   |
| Apop                                  | 115    | 1.15   | 1.46   | 62.7   | 4.82    | ###   |
| G1                                    | 3758   | 37.58  | 47.76  | 107    | 10.93   | ###   |
| G2M                                   | 1993   | 19.93  | 25.33  | 220    | 1.75    | ###   |
| S                                     | 980    | 9.80   | 12.46  | 149    | 4.61    | ###   |

Institution:  
Protocol: 202\_00010650 513.PRO  
Listmode Replay: New Protocol  
Analysis Date: 03-May-2012, 13:22:03  
Settings File: 00Ciclo Celular de Javi.PRO, 03-May-2012, 10:53:20  
Listmode File: 23\_00010672 535.LMD

Run Date: 03-May-12, 11:36:04  
Sample ID: Well 23  
User ID: anajavi  
Acquisition Time/Events: 110.2s / 10000 (UNKNOWN)  
Instrument SN: AL01002 Software Version: CXP v2.2

(F1)[Ungated] 23\_00010672 535.LMD : FS Lin/SS Lin - ADC

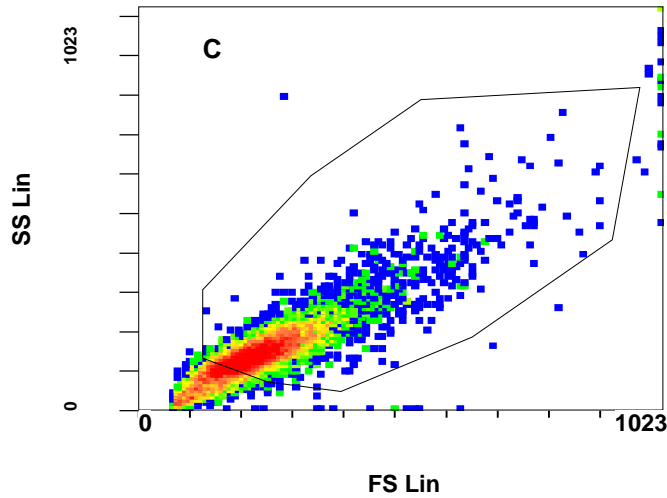

(F1)[Ungated] 23\_00010672 535.LMD : FL3 Lin/AUX - ADC

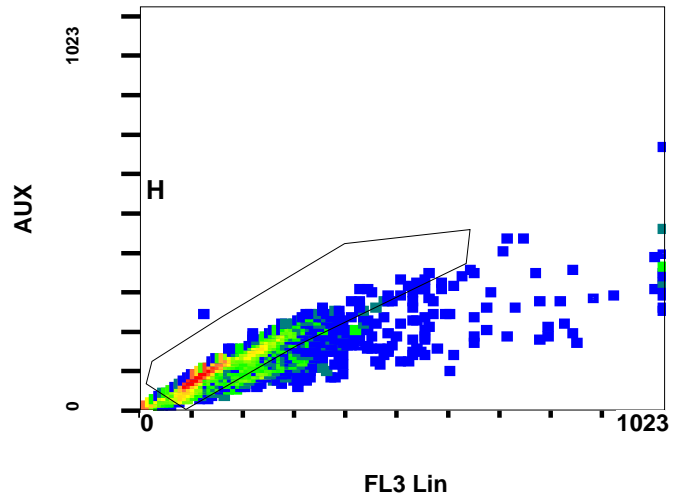

(F1)[H] 23\_00010672 535.LMD : FL3 Lin - ADC

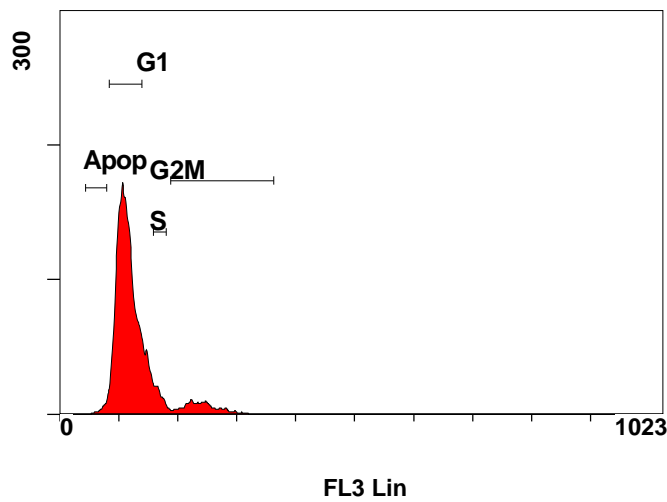

(F1)[H] 23\_00010672 535.LMD : FL3 Lin/SS Lin - ADC

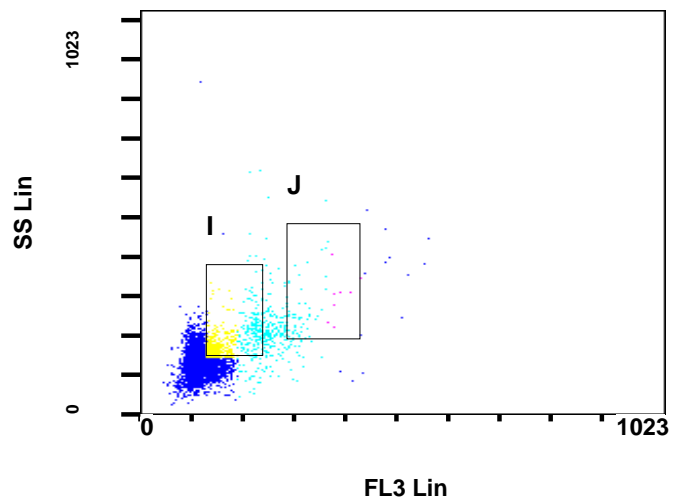

**Statistical Analysis**

**PROGRAM INFORMATION**

File:- 23\_00010672 535.LMD

Gate:- H [H]

Compensation:- Advanced

Filename:- 23\_00010672 535.LMD

Mean Calculation Method:-LOG-LOG

| Region | Number | %Total | %Gated | X-Mean | X-HPCV | Y-Mean |
|--------|--------|--------|--------|--------|--------|--------|
| ALL    | 8357   | 83.57  | 100.00 | 133    | 11.04  | ###    |
| ALL    | 8357   | 83.57  | 100.00 | 133    | 11.04  | 148    |
| Apop   | 147    | 1.47   | 1.76   | 68.5   | 0.69   | ###    |
| G1     | 5981   | 59.81  | 71.57  | 111    | 11.04  | ###    |
| G2M    | 919    | 9.19   | 11.00  | 249    | 0.76   | ###    |
| I      | 1175   | 11.75  | 14.06  | 168    | 4.91   | 189    |
| J      | 131    | 1.31   | 1.57   | 319    | 0.25   | 255    |
| S      | 412    | 4.12   | 4.93   | 167    | 2.94   | ###    |

File:- 23\_00010672 535.LMD

Gate:- Ungated

Compensation:- Advanced

Filename:- 23\_00010672 535.LMD

Mean Calculation Method:-LOG-LOG

| Region | Number | %Total | %Gated | X-Mean | X-HPCV | Y-Mean |
|--------|--------|--------|--------|--------|--------|--------|
| ALL    | 10000  | 100.00 | 100.00 | 238    | 17.66  | 146    |
| ALL    | 10000  | 100.00 | 100.00 | 129    | 156.26 | 87.4   |
| C      | 7675   | 76.75  | 76.75  | 263    | 16.68  | 165    |
| H      | 8357   | 83.57  | 83.57  | 133    | 11.04  | 95.7   |

Institution:

Run Date: 03-May-12, 11:36:04

Protocol: 202\_00010650 513.PRO

Sample ID: Well 23

Listmode Replay: New Protocol

User ID: anajavi

Analysis Date: 03-May-2012, 13:22:03

Acquisition Time/Events: 110.2s / 10000 (UNKNOWN)

Settings File: 00Ciclo Celular de Javi.PRO, 03-May-2012, 10:53:20

Tube ID: NoRead

Listmode File: 23\_00010672 535.LMD

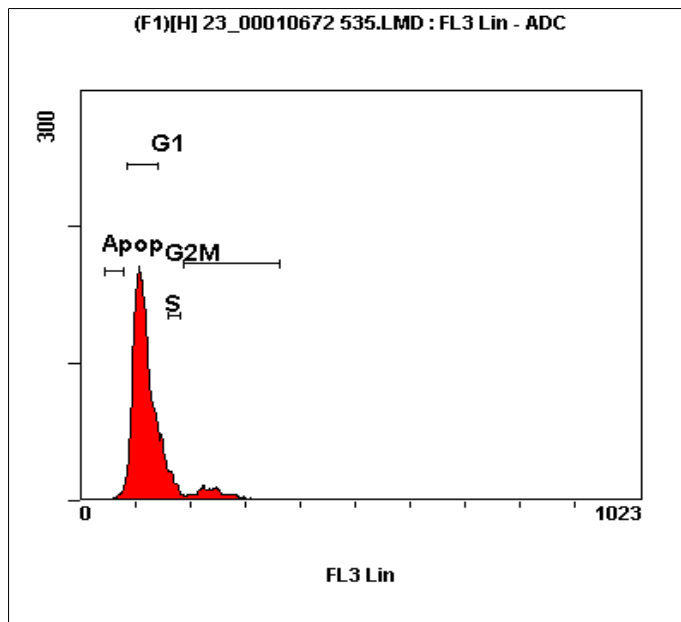

| (F1)[H] 23_00010672 535.LMD : FL3 Lin |        |        |        |        |         |        |
|---------------------------------------|--------|--------|--------|--------|---------|--------|
| Region                                | Number | %Total | %Gated | X-Mean | HP X-CV | Y-Mean |
| ALL                                   | 8357   | 83.57  | 100.00 | 133    | 11.04   | ###    |
| Apop                                  | 147    | 1.47   | 1.76   | 68.5   | 0.69    | ###    |
| G1                                    | 5981   | 59.81  | 71.57  | 111    | 11.04   | ###    |
| G2M                                   | 919    | 9.19   | 11.00  | 249    | 0.76    | ###    |
| S                                     | 412    | 4.12   | 4.93   | 167    | 2.94    | ###    |

Institution:  
Protocol: 202\_00010650 513.PRO  
Listmode Replay: New Protocol  
Analysis Date: 03-May-2012, 13:22:28  
Settings File: 00Ciclo Celular de Javi.PRO, 03-May-2012, 10:53:20  
Listmode File: 25\_00010673 536.LMD

Run Date: 03-May-12, 11:38:30  
Sample ID: Well 25  
User ID: anajavi  
Acquisition Time/Events: 145.2s / 10000 (UNKNOWN)  
Instrument SN: AL01002 Software Version: CXP v2.2

(F1)[Ungated] 25\_00010673 536.LMD : FS Lin/SS Lin - ADC

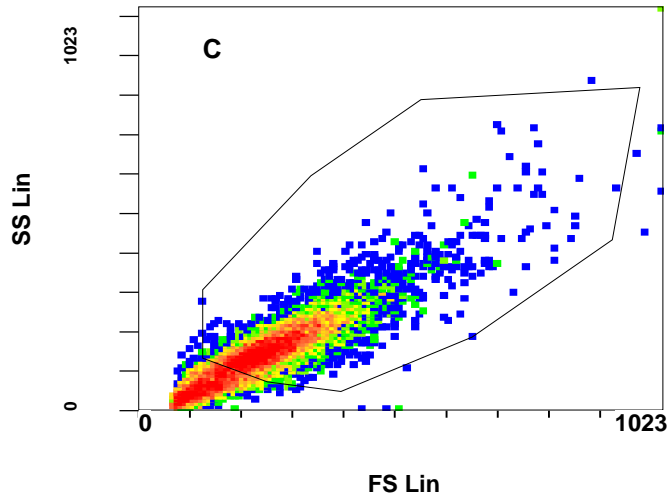

(F1)[Ungated] 25\_00010673 536.LMD : FL3 Lin/AUX - ADC

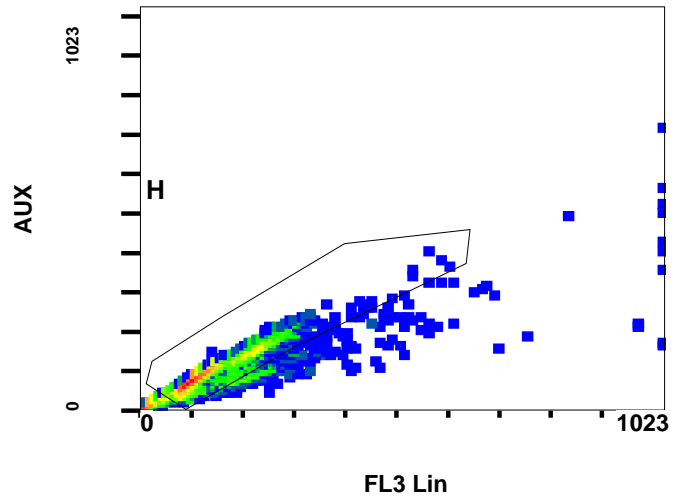

(F1)[H] 25\_00010673 536.LMD : FL3 Lin - ADC

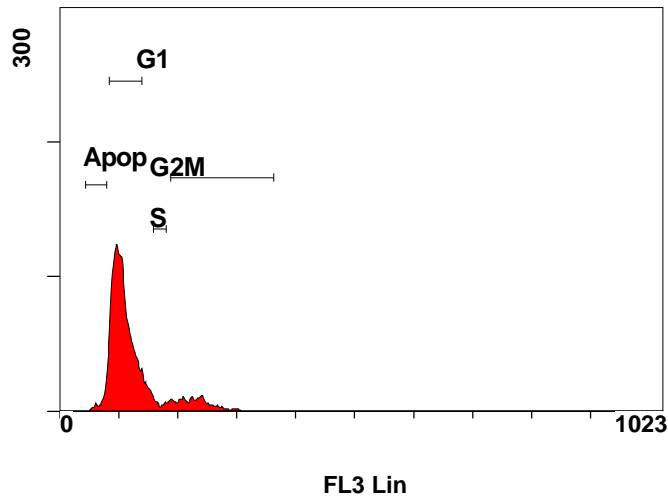

(F1)[H] 25\_00010673 536.LMD : FL3 Lin/SS Lin - ADC

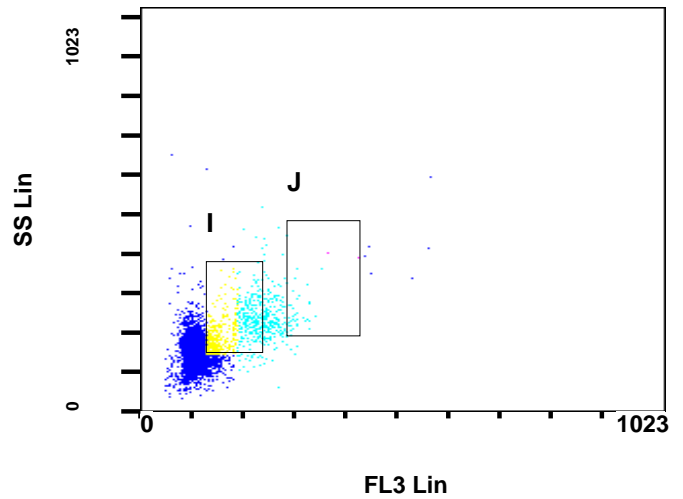

**Statistical Analysis**

**PROGRAM INFORMATION**

File:- 25\_00010673 536.LMD

Gate:- H [H]

Compensation:- Advanced

Filename:- 25\_00010673 536.LMD

Mean Calculation Method:-LOG-LOG

| Region | Number | %Total | %Gated | X-Mean | X-HPCV | Y-Mean |
|--------|--------|--------|--------|--------|--------|--------|
| ALL    | 6394   | 63.94  | 100.00 | 129    | 11.59  | ###    |
| ALL    | 6394   | 63.94  | 100.00 | 129    | 11.59  | 167    |
| Apop   | 249    | 2.49   | 3.89   | 68.5   | 2.62   | ###    |
| G1     | 4415   | 44.15  | 69.05  | 106    | 11.59  | ###    |
| G2M    | 936    | 9.36   | 14.64  | 238    | 0.98   | ###    |
| I      | 1150   | 11.50  | 17.99  | 177    | 4.88   | 213    |
| J      | 96     | 0.96   | 1.50   | 310    | 0.25   | 262    |
| S      | 183    | 1.83   | 2.86   | 168    | 1.94   | ###    |

File:- 25\_00010673 536.LMD

Gate:- Ungated

Compensation:- Advanced

Filename:- 25\_00010673 536.LMD

Mean Calculation Method:-LOG-LOG

| Region | Number | %Total | %Gated | X-Mean | X-HPCV | Y-Mean |
|--------|--------|--------|--------|--------|--------|--------|
| ALL    | 10000  | 100.00 | 100.00 | 240    | 6.33   | 142    |
| ALL    | 10000  | 100.00 | 100.00 | 94.7   | 139.60 | 64.8   |
| C      | 6797   | 67.97  | 67.97  | 288    | 12.25  | 178    |
| H      | 6394   | 63.94  | 63.94  | 129    | 11.59  | 92.3   |

Institution:

Run Date: 03-May-12, 11:38:30

Protocol: 202\_00010650 513.PRO

Sample ID: Well 25

Listmode Replay: New Protocol

User ID: anajavi

Analysis Date: 03-May-2012, 13:22:29

Acquisition Time/Events: 145.2s / 10000 (UNKNOWN)

Settings File: 00Ciclo Celular de Javi.PRO, 03-May-2012, 10:53:20

Tube ID: NoRead

Listmode File: 25\_00010673 536.LMD

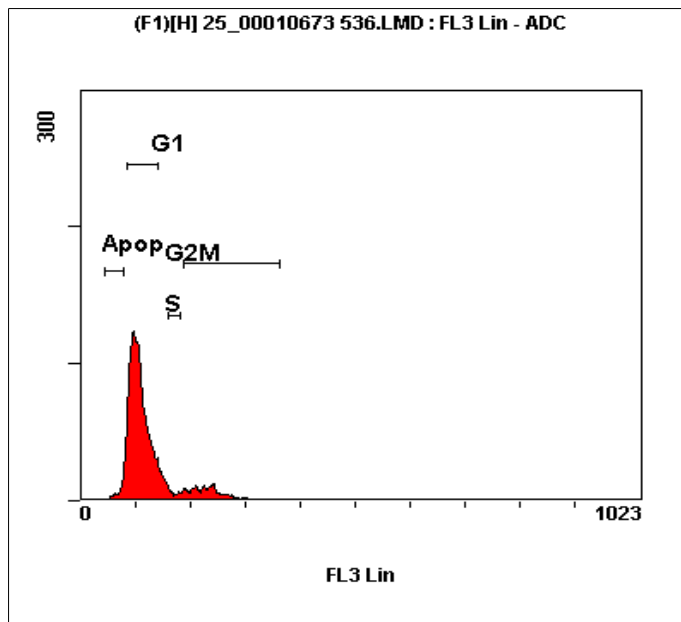

| (F1)[H] 25_00010673 536.LMD : FL3 Lin |        |        |        |        |         |        |
|---------------------------------------|--------|--------|--------|--------|---------|--------|
| Region                                | Number | %Total | %Gated | X-Mean | HP X-CV | Y-Mean |
| ALL                                   | 6394   | 63.94  | 100.00 | 129    | 11.59   | ###    |
| Apop                                  | 249    | 2.49   | 3.89   | 68.5   | 2.62    | ###    |
| G1                                    | 4415   | 44.15  | 69.05  | 106    | 11.59   | ###    |
| G2M                                   | 936    | 9.36   | 14.64  | 238    | 0.98    | ###    |
| S                                     | 183    | 1.83   | 2.86   | 168    | 1.94    | ###    |



Institution:  
Protocol: 202\_00010650 513.PRO  
Listmode Replay: New Protocol  
Analysis Date: 03-May-2012, 13:23:03  
Settings File: 00Ciclo Celular de Javi.PRO, 03-May-2012, 10:53:20  
Listmode File: 26\_00010674 537.LMD

Run Date: 03-May-12, 11:41:32  
Sample ID: Well 26  
User ID: anajavi  
Acquisition Time/Events: 257.5s / 10000 (UNKNOWN)  
Instrument SN: AL01002 Software Version: CXP v2.2

(F1)[Ungated] 26\_00010674 537.LMD : FS Lin/SS Lin - ADC

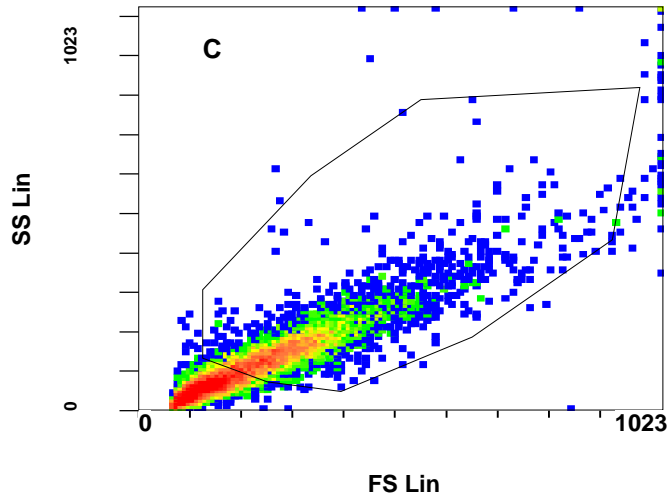

(F1)[Ungated] 26\_00010674 537.LMD : FL3 Lin/AUX - ADC

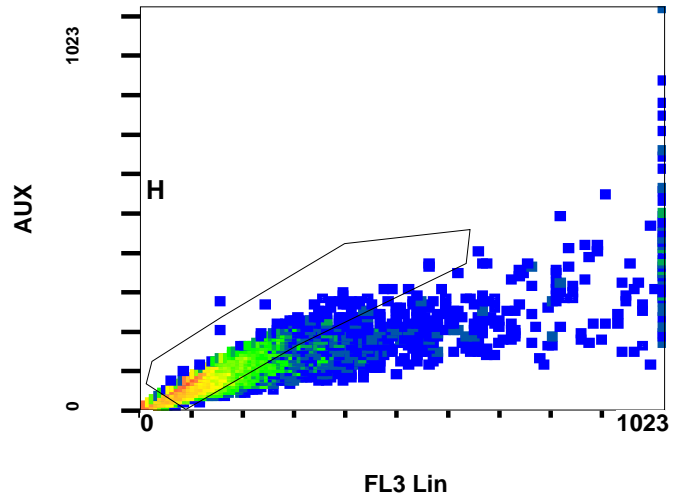

(F1)[H] 26\_00010674 537.LMD : FL3 Lin - ADC

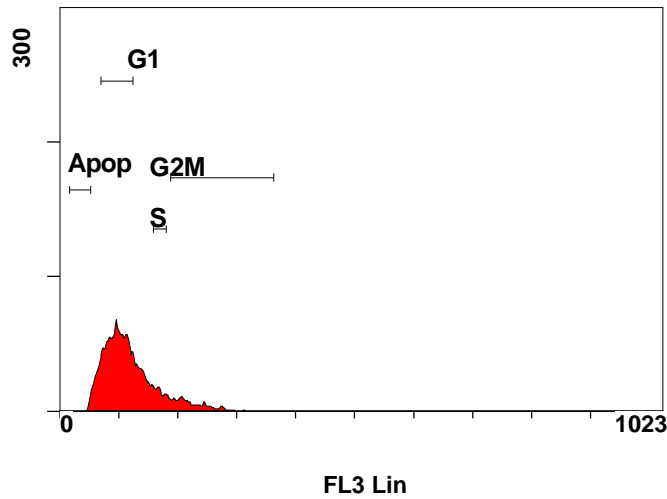

(F1)[H] 26\_00010674 537.LMD : FL3 Lin/SS Lin - ADC

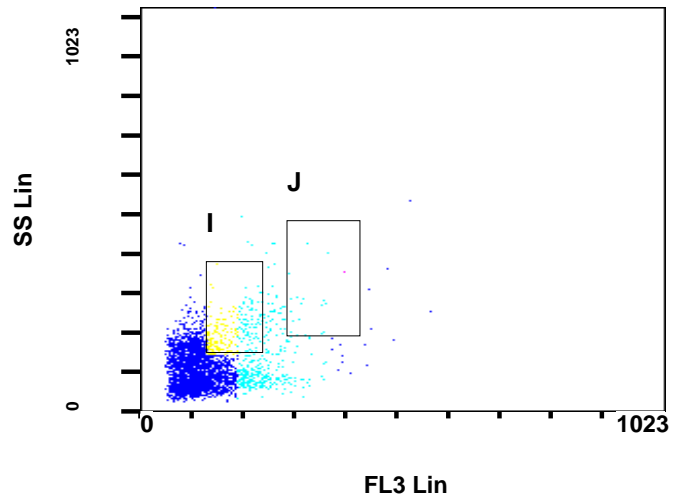

**Statistical Analysis**

**PROGRAM INFORMATION**

| File:- 26_00010674 537.LMD       |        |        |        |        |        |        |
|----------------------------------|--------|--------|--------|--------|--------|--------|
| Gate:- H [H]                     |        |        |        |        |        |        |
| Compensation:- Advanced          |        |        |        |        |        |        |
| Filename:- 26_00010674 537.LMD   |        |        |        |        |        |        |
| Mean Calculation Method:-LOG-LOG |        |        |        |        |        |        |
| Region                           | Number | %Total | %Gated | X-Mean | X-HPCV | Y-Mean |
| ALL                              | 5899   | 58.99  | 100.00 | 127    | 19.81  | ###    |
| ALL                              | 5899   | 58.99  | 100.00 | 127    | 19.81  | 120    |
| Apop                             | 52     | 0.52   | 0.88   | 50     | 2.20   | ###    |
| G1                               | 3102   | 31.02  | 52.59  | 96.8   | 19.81  | ###    |
| G2M                              | 779    | 7.79   | 13.21  | 238    | 1.78   | ###    |
| I                                | 436    | 4.36   | 7.39   | 174    | 1.04   | 202    |
| J                                | 52     | 0.52   | 0.88   | 325    | 0.19   | 254    |
| S                                | 395    | 3.95   | 6.70   | 168    | 3.52   | ###    |

| File:- 26_00010674 537.LMD       |        |        |        |        |        |        |
|----------------------------------|--------|--------|--------|--------|--------|--------|
| Gate:- Ungated                   |        |        |        |        |        |        |
| Compensation:- Advanced          |        |        |        |        |        |        |
| Filename:- 26_00010674 537.LMD   |        |        |        |        |        |        |
| Mean Calculation Method:-LOG-LOG |        |        |        |        |        |        |
| Region                           | Number | %Total | %Gated | X-Mean | X-HPCV | Y-Mean |
| ALL                              | 10000  | 100.00 | 100.00 | 219    | 32.63  | 113    |
| ALL                              | 10000  | 100.00 | 100.00 | 124    | ###    | 66     |
| C                                | 4529   | 45.29  | 45.29  | 313    | 0.86   | 170    |
| H                                | 5899   | 58.99  | 58.99  | 127    | 19.81  | 79.5   |

Institution:

Run Date: 03-May-12, 11:41:32

Protocol: 202\_00010650 513.PRO

Sample ID: Well 26

Listmode Replay: New Protocol

User ID: anajavi

Analysis Date: 03-May-2012, 13:23:04

Acquisition Time/Events: 257.5s / 10000 (UNKNOWN)

Settings File: 00Ciclo Celular de Javi.PRO, 03-May-2012, 10:53:20

Tube ID: NoRead

Listmode File: 26\_00010674 537.LMD

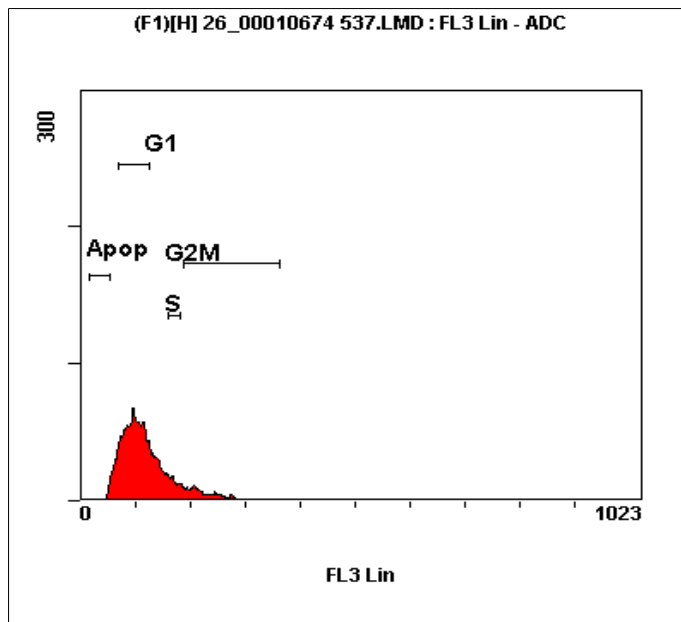

| (F1)[H] 26_00010674 537.LMD : FL3 Lin |        |        |        |        |         |       |
|---------------------------------------|--------|--------|--------|--------|---------|-------|
| Region                                | Number | %Total | %Gated | X-Mean | HP X-CV | Y-Mea |
| ALL                                   | 5899   | 58.99  | 100.00 | 127    | 19.81   | ###   |
| Apop                                  | 52     | 0.52   | 0.88   | 50     | 2.20    | ###   |
| G1                                    | 3102   | 31.02  | 52.59  | 96.8   | 19.81   | ###   |
| G2M                                   | 779    | 7.79   | 13.21  | 238    | 1.78    | ###   |
| S                                     | 395    | 3.95   | 6.70   | 168    | 3.52    | ###   |

Institution:  
Protocol: 202\_00010650 513.PRO  
Listmode Replay: New Protocol  
Analysis Date: 03-May-2012, 13:23:36  
Settings File: 00Ciclo Celular de Javi.PRO, 03-May-2012, 10:53:20  
Listmode File: 27\_00010675 538.LMD

Run Date: 03-May-12, 11:46:25  
Sample ID: Well 27  
User ID: anajavi  
Acquisition Time/Events: 117.9s / 10000 (UNKNOWN)  
Instrument SN: AL01002 Software Version: CXP v2.2

(F1)[Ungated] 27\_00010675 538.LMD : FS Lin/SS Lin - ADC

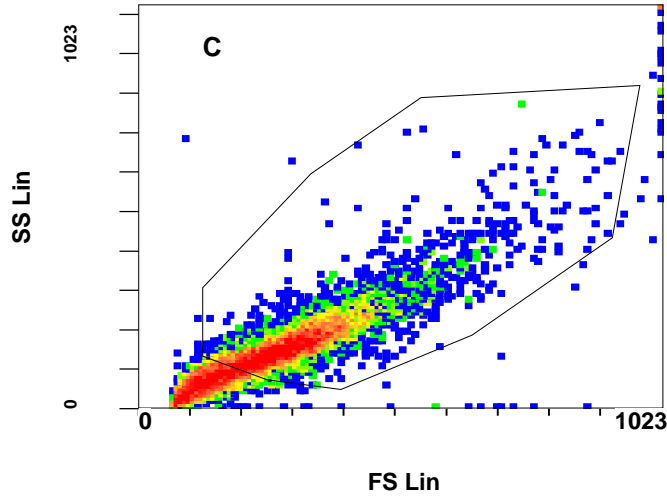

(F1)[Ungated] 27\_00010675 538.LMD : FL3 Lin/AUX - ADC

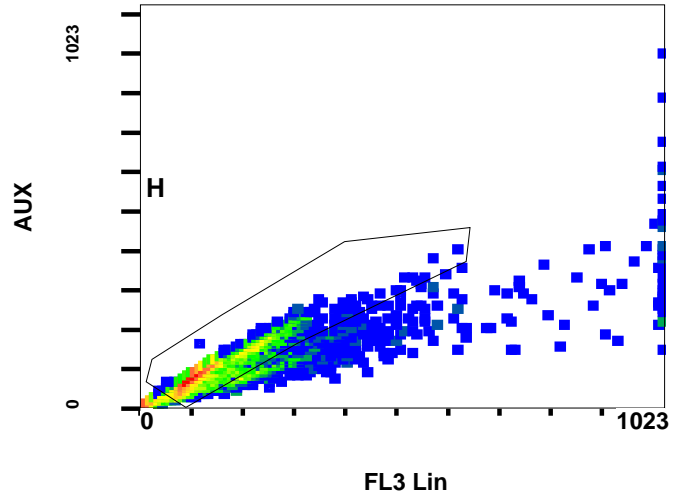

(F1)[H] 27\_00010675 538.LMD : FL3 Lin - ADC

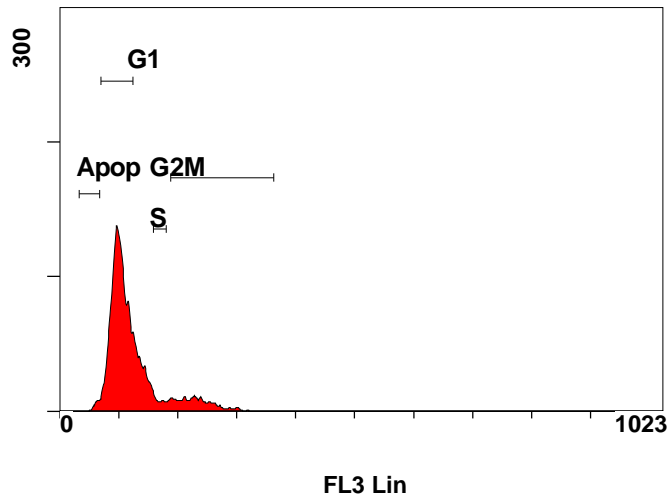

(F1)[H] 27\_00010675 538.LMD : FL3 Lin/SS Lin - ADC

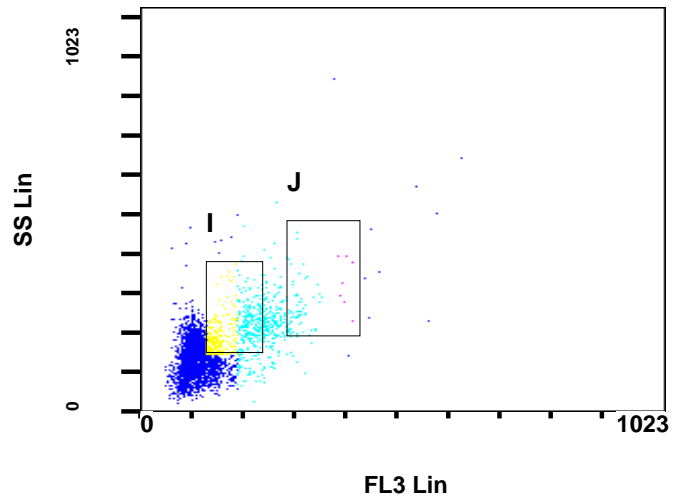

**Statistical Analysis**

**PROGRAM INFORMATION**

| File:- 27_00010675 538.LMD       |        |        |        |        |        |        |
|----------------------------------|--------|--------|--------|--------|--------|--------|
| Gate:- H [H]                     |        |        |        |        |        |        |
| Compensation:- Advanced          |        |        |        |        |        |        |
| Filename:- 27_00010675 538.LMD   |        |        |        |        |        |        |
| Mean Calculation Method:-LOG-LOG |        |        |        |        |        |        |
| Region                           | Number | %Total | %Gated | X-Mean | X-HPCV | Y-Mean |
| ALL                              | 7188   | 71.88  | 100.00 | 129    | 11.11  | ###    |
| ALL                              | 7188   | 71.88  | 100.00 | 129    | 11.11  | 155    |
| Apop                             | 124    | 1.24   | 1.73   | 60.2   | 2.02   | ###    |
| G1                               | 4530   | 45.30  | 63.02  | 100    | 11.11  | ###    |
| G2M                              | 1010   | 10.10  | 14.05  | 240    | 0.55   | ###    |
| I                                | 1072   | 10.72  | 14.91  | 178    | 1.44   | 206    |
| J                                | 137    | 1.37   | 1.91   | 313    | 0.86   | 266    |
| S                                | 225    | 2.25   | 3.13   | 168    | 1.33   | ###    |

| File:- 27_00010675 538.LMD       |        |        |        |        |        |        |
|----------------------------------|--------|--------|--------|--------|--------|--------|
| Gate:- Ungated                   |        |        |        |        |        |        |
| Compensation:- Advanced          |        |        |        |        |        |        |
| Filename:- 27_00010675 538.LMD   |        |        |        |        |        |        |
| Mean Calculation Method:-LOG-LOG |        |        |        |        |        |        |
| Region                           | Number | %Total | %Gated | X-Mean | X-HPCV | Y-Mean |
| ALL                              | 10000  | 100.00 | 100.00 | 266    | 6.65   | 146    |
| ALL                              | 10000  | 100.00 | 100.00 | 117    | ###    | 76.2   |
| C                                | 6937   | 69.37  | 69.37  | 318    | 6.44   | 177    |
| H                                | 7188   | 71.88  | 71.88  | 129    | 11.11  | 91.8   |

Institution:

Run Date: 03-May-12, 11:46:25

Protocol: 202\_00010650 513.PRO

Sample ID: Well 27

Listmode Replay: New Protocol

User ID: anajavi

Analysis Date: 03-May-2012, 13:23:37

Acquisition Time/Events: 117.9s / 10000 (UNKNOWN)

Settings File: 00Ciclo Celular de Javi.PRO, 03-May-2012, 10:53:20

Tube ID: NoRead

Listmode File: 27\_00010675 538.LMD

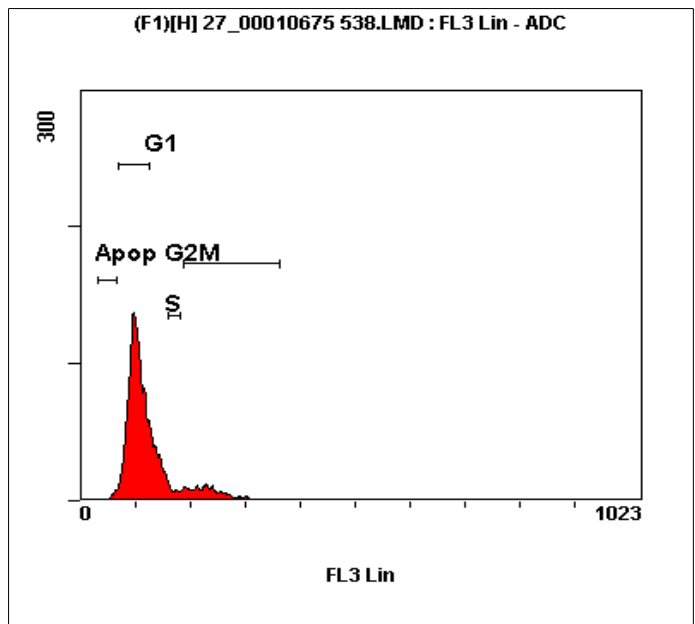

| (F1)[H] 27_00010675 538.LMD : FL3 Lin |        |        |        |        |         |       |
|---------------------------------------|--------|--------|--------|--------|---------|-------|
| Region                                | Number | %Total | %Gated | X-Mean | HP X-CV | Y-Mea |
| ALL                                   | 7188   | 71.88  | 100.00 | 129    | 11.11   | ###   |
| Apop                                  | 124    | 1.24   | 1.73   | 60.2   | 2.02    | ###   |
| G1                                    | 4530   | 45.30  | 63.02  | 100    | 11.11   | ###   |
| G2M                                   | 1010   | 10.10  | 14.05  | 240    | 0.55    | ###   |
| S                                     | 225    | 2.25   | 3.13   | 168    | 1.33    | ###   |

Institution:  
Protocol: 202\_00010650 513.PRO  
Listmode Replay: New Protocol  
Analysis Date: 03-May-2012, 13:08:17  
Settings File: 00Ciclo Celular de Javi.PRO, 03-May-2012, 10:53:20  
Listmode File: 03\_00010678 541.LMD

Run Date: 03-May-12, 11:55:16  
Sample ID: Well 03  
User ID: anajavi  
Acquisition Time/Events: 76.9s / 10000 (UNKNOWN)  
Instrument SN: AL01002 Software Version: CXP v2.2

(F1)[Ungated] 03\_00010678 541.LMD : FS Lin/SS Lin - ADC

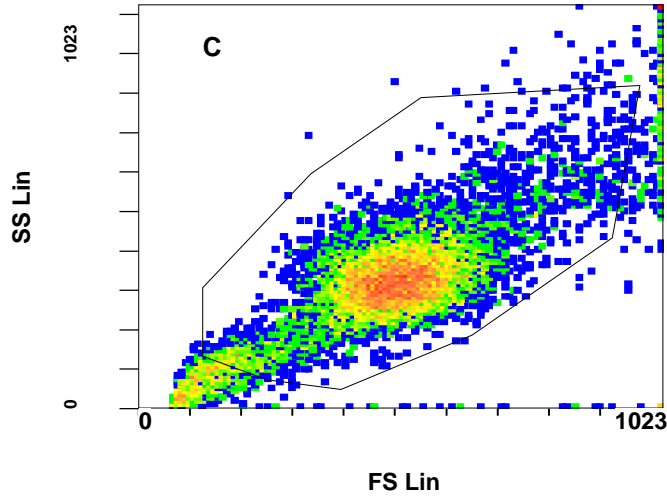

(F1)[Ungated] 03\_00010678 541.LMD : FL3 Lin/AUX - ADC

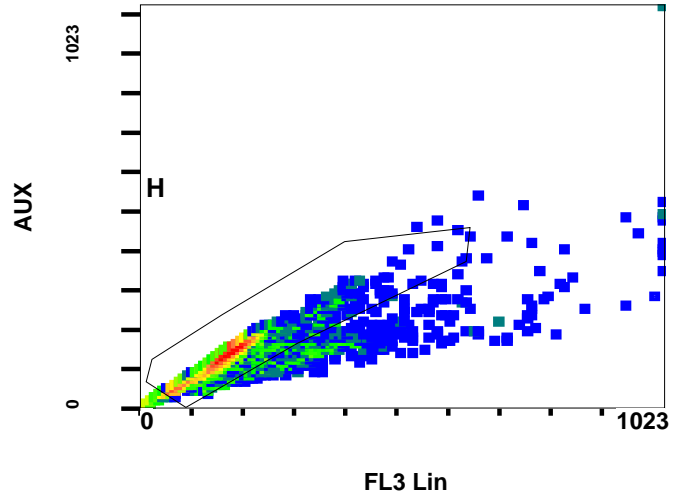

(F1)[H] 03\_00010678 541.LMD : FL3 Lin - ADC

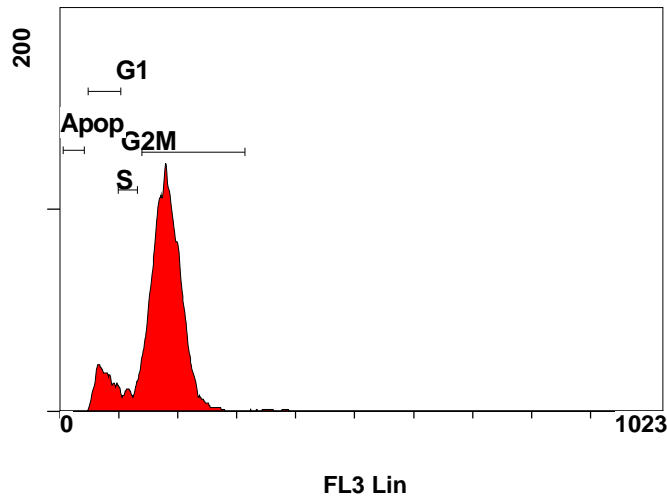

(F1)[H] 03\_00010678 541.LMD : FL3 Lin/SS Lin - ADC

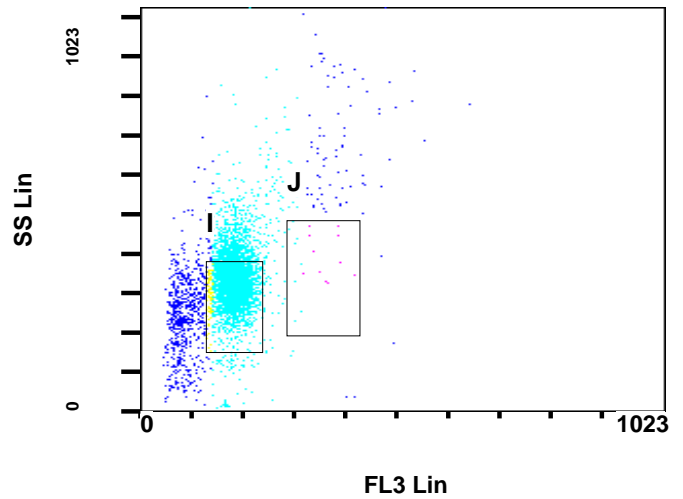

**Statistical Analysis**

**PROGRAM INFORMATION**

File:- 03\_00010678 541.LMD

Gate:- H [H]

Compensation:- Advanced

Filename:- 03\_00010678 541.LMD

Mean Calculation Method:-LOG-LOG

| Region | Number | %Total | %Gated | X-Mean | X-HPCV | Y-Mean |
|--------|--------|--------|--------|--------|--------|--------|
| ALL    | 8465   | 84.65  | 100.00 | 173    | 11.51  | ###    |
| ALL    | 8465   | 84.65  | 100.00 | 173    | 11.51  | 334    |
| Apop   | 0      | 0.00   | 0.00   | 0      | 0.00   | ###    |
| G1     | 950    | 9.50   | 11.22  | 76.5   | 9.93   | ###    |
| G2M    | 6872   | 68.72  | 81.18  | 185    | 11.51  | ###    |
| I      | 5054   | 50.54  | 59.70  | 180    | 11.12  | 311    |
| J      | 30     | 0.30   | 0.35   | 340    | 0.14   | 398    |
| S      | 388    | 3.88   | 4.58   | 115    | 2.01   | ###    |

File:- 03\_00010678 541.LMD

Gate:- Ungated

Compensation:- Advanced

Filename:- 03\_00010678 541.LMD

Mean Calculation Method:-LOG-LOG

| Region | Number | %Total | %Gated | X-Mean | X-HPCV | Y-Mean |
|--------|--------|--------|--------|--------|--------|--------|
| ALL    | 10000  | 100.00 | 100.00 | 167    | 99.18  | 123    |
| ALL    | 10000  | 100.00 | 100.00 | 491    | 0.00   | 325    |
| C      | 8787   | 87.87  | 87.87  | 503    | 3.10   | 332    |
| H      | 8465   | 84.65  | 84.65  | 173    | 11.51  | 135    |



Institution:

Run Date: 03-May-12, 11:55:16

Protocol: 202\_00010650 513.PRO

Sample ID: Well 03

Listmode Replay: New Protocol

User ID: anajavi

Analysis Date: 03-May-2012, 13:08:17

Acquisition Time/Events: 76.9s / 10000 (UNKNOWN)

Settings File: 00Ciclo Celular de Javi.PRO, 03-May-2012, 10:53:20

Tube ID: NoRead

Listmode File: 03\_00010678 541.LMD

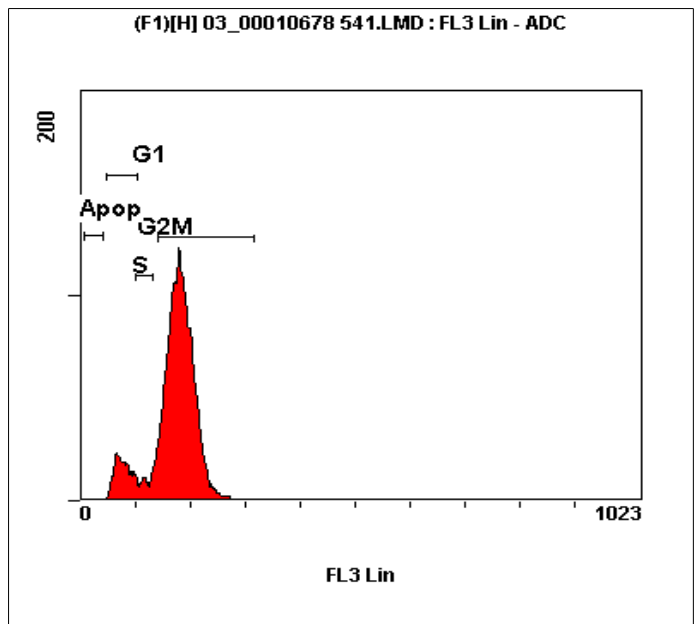

| (F1)[H] 03_00010678 541.LMD : FL3 Lin |        |        |        |        |         |       |
|---------------------------------------|--------|--------|--------|--------|---------|-------|
| Region                                | Number | %Total | %Gated | X-Mean | HP X-CV | Y-Mea |
| ALL                                   | 8465   | 84.65  | 100.00 | 173    | 11.51   | ###   |
| Apop                                  | 0      | 0.00   | 0.00   | 0      | 0.00    | ###   |
| G1                                    | 950    | 9.50   | 11.22  | 76.5   | 9.93    | ###   |
| G2M                                   | 6872   | 68.72  | 81.18  | 185    | 11.51   | ###   |
| S                                     | 388    | 3.88   | 4.58   | 115    | 2.01    | ###   |

Institution:  
Protocol: 202\_00010650 513.PRO  
Listmode Replay: New Protocol  
Analysis Date: 03-May-2012, 13:08:53  
Settings File: 00Ciclo Celular de Javi.PRO, 03-May-2012, 10:53:20  
Listmode File: 04\_00010679 542.LMD

Run Date: 03-May-12, 11:57:09  
Sample ID: Well 04  
User ID: anajavi  
Acquisition Time/Events: 119.1s / 10000 (UNKNOWN)  
Instrument SN: AL01002 Software Version: CXP v2.2

(F1)[Ungated] 04\_00010679 542.LMD : FS Lin/SS Lin - ADC

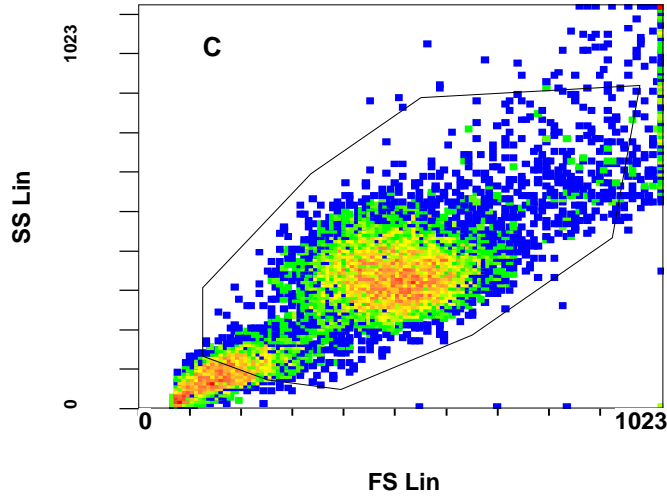

(F1)[Ungated] 04\_00010679 542.LMD : FL3 Lin/AUX - ADC

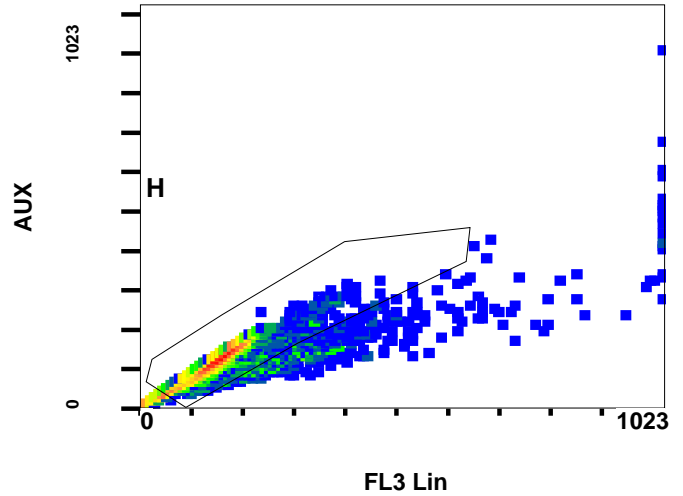

(F1)[H] 04\_00010679 542.LMD : FL3 Lin - ADC

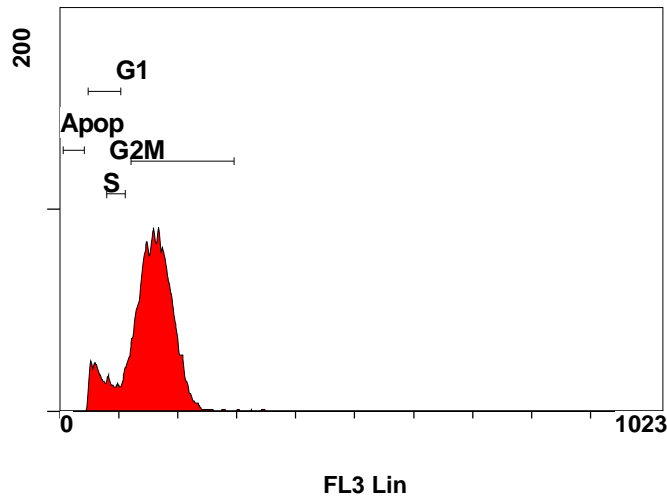

(F1)[H] 04\_00010679 542.LMD : FL3 Lin/SS Lin - ADC

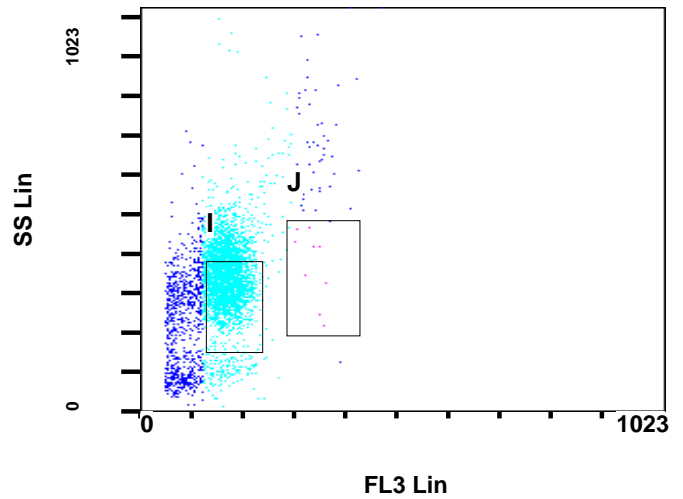

**Statistical Analysis**

**PROGRAM INFORMATION**

| File:- 04_00010679 542.LMD       |        |        |        |        |        |        |
|----------------------------------|--------|--------|--------|--------|--------|--------|
| Gate:- H [H]                     |        |        |        |        |        |        |
| Compensation:- Advanced          |        |        |        |        |        |        |
| Filename:- 04_00010679 542.LMD   |        |        |        |        |        |        |
| Mean Calculation Method:-LOG-LOG |        |        |        |        |        |        |
| Region                           | Number | %Total | %Gated | X-Mean | X-HPCV | Y-Mean |
| ALL                              | 7759   | 77.59  | 100.00 | 154    | 14.12  | ###    |
| ALL                              | 7759   | 77.59  | 100.00 | 154    | 14.12  | 328    |
| Apop                             | 0      | 0.00   | 0.00   | 0      | 0.00   | ###    |
| G1                               | 1038   | 10.38  | 13.38  | 72.6   | 1.18   | ###    |
| G2M                              | 6228   | 62.28  | 80.27  | 167    | 14.12  | ###    |
| I                                | 3705   | 37.05  | 47.75  | 168    | 9.36   | 312    |
| J                                | 27     | 0.27   | 0.35   | 326    | 0.14   | 377    |
| S                                | 547    | 5.47   | 7.05   | 95.3   | 1.67   | ###    |

| File:- 04_00010679 542.LMD       |        |        |        |        |        |        |
|----------------------------------|--------|--------|--------|--------|--------|--------|
| Gate:- Ungated                   |        |        |        |        |        |        |
| Compensation:- Advanced          |        |        |        |        |        |        |
| Filename:- 04_00010679 542.LMD   |        |        |        |        |        |        |
| Mean Calculation Method:-LOG-LOG |        |        |        |        |        |        |
| Region                           | Number | %Total | %Gated | X-Mean | X-HPCV | Y-Mean |
| ALL                              | 10000  | 100.00 | 100.00 | 138    | 76.40  | 102    |
| ALL                              | 10000  | 100.00 | 100.00 | 444    | 0.00   | 302    |
| C                                | 8159   | 81.59  | 81.59  | 480    | 2.68   | 327    |
| H                                | 7759   | 77.59  | 77.59  | 154    | 14.12  | 121    |

Institution:

Run Date: 03-May-12, 11:57:09

Protocol: 202\_00010650 513.PRO

Sample ID: Well 04

Listmode Replay: New Protocol

User ID: anajavi

Analysis Date: 03-May-2012, 13:08:53

Acquisition Time/Events: 119.1s / 10000 (UNKNOWN)

Settings File: 00Ciclo Celular de Javi.PRO, 03-May-2012, 10:53:20

Tube ID: NoRead

Listmode File: 04\_00010679 542.LMD

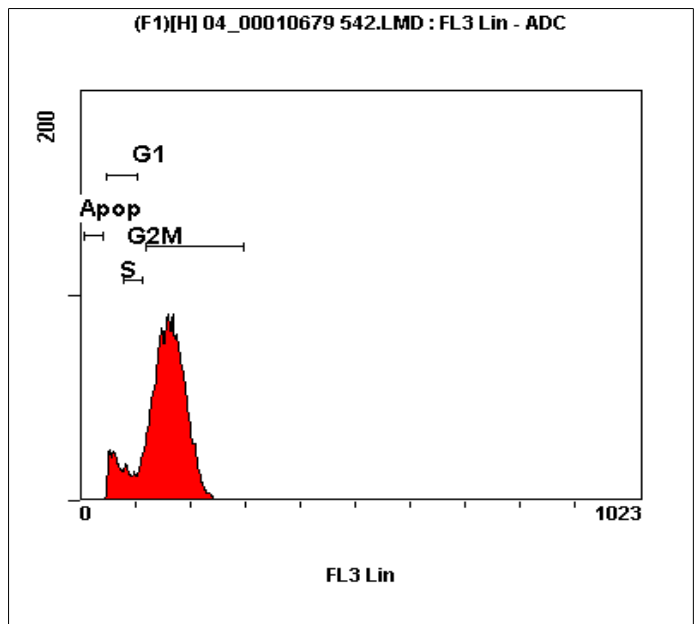

| (F1)[H] 04_00010679 542.LMD : FL3 Lin |        |        |        |        |         |       |
|---------------------------------------|--------|--------|--------|--------|---------|-------|
| Region                                | Number | %Total | %Gated | X-Mean | HP X-CV | Y-Mea |
| ALL                                   | 7759   | 77.59  | 100.00 | 154    | 14.12   | ###   |
| Apop                                  | 0      | 0.00   | 0.00   | 0      | 0.00    | ###   |
| G1                                    | 1038   | 10.38  | 13.38  | 72.6   | 1.18    | ###   |
| G2M                                   | 6228   | 62.28  | 80.27  | 167    | 14.12   | ###   |
| S                                     | 547    | 5.47   | 7.05   | 95.3   | 1.67    | ###   |

Institution:  
Protocol: 01\_00010606 476.PRO  
Listmode Replay: New Protocol  
Analysis Date: 03-May-2012, 12:41:22  
Settings File: 00Ciclo Celular de Javi.PRO, 18-Apr-2012, 11:34:20  
Listmode File: 101\_00010649 512.LMD

Run Date: 02-May-12, 14:50:47  
Sample ID: Well 01  
User ID: anajavi  
Acquisition Time/Events: 36.7s / 10000 (UNKNOWN)  
Instrument SN: AL01002 Software Version: CXP v2.2

(F1)[Ungated] 101\_00010649 512.LMD : FS Lin/SS Lin - ADC

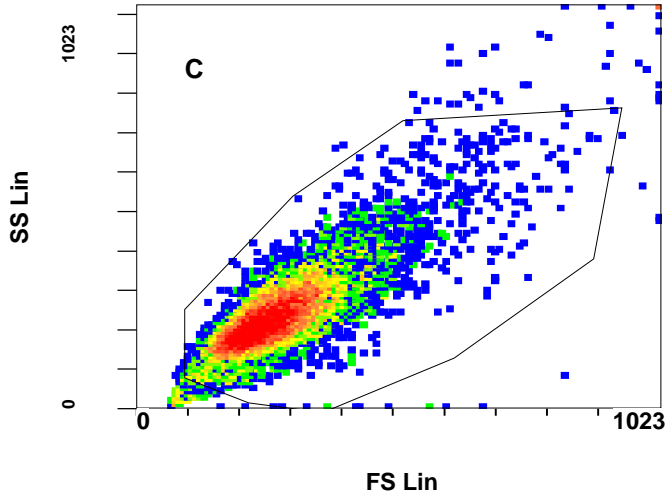

(F1)[Ungated] 101\_00010649 512.LMD : FL3 Lin/AUX - ADC

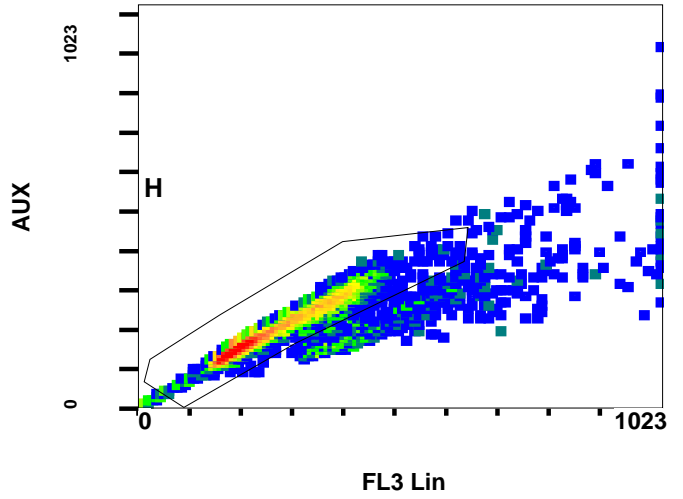

(F1)[H] 101\_00010649 512.LMD : FL3 Lin - ADC

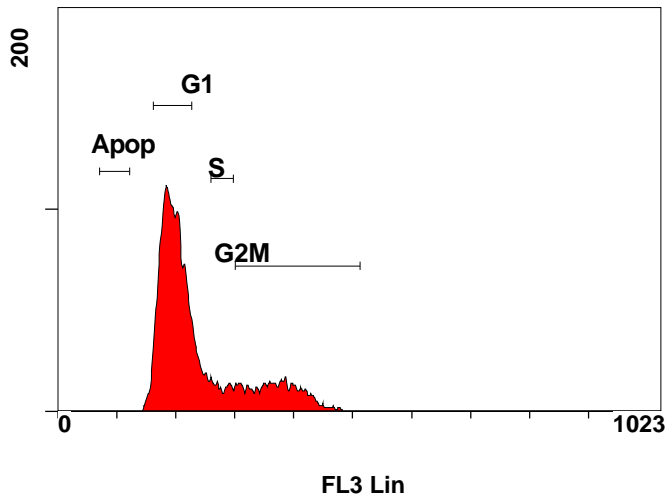

(F1)[H] 101\_00010649 512.LMD : FL3 Lin/SS Lin - ADC

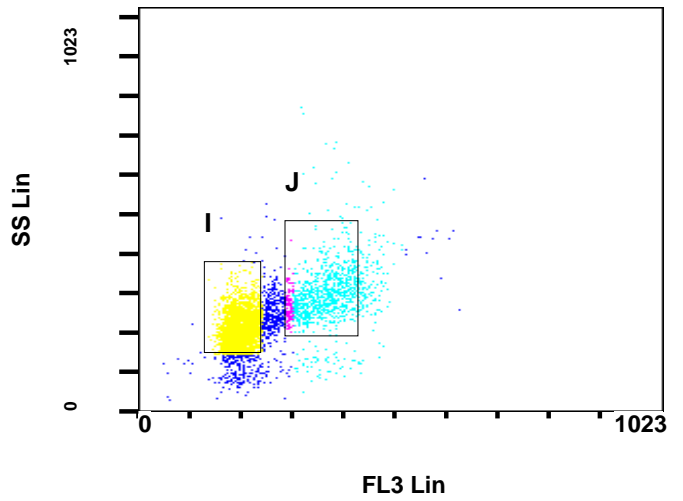

**Statistical Analysis**

**PROGRAM INFORMATION**

| File:- 101_00010649 512.LMD      |        |        |        |        |        |        |
|----------------------------------|--------|--------|--------|--------|--------|--------|
| Gate:- H [H]                     |        |        |        |        |        |        |
| Compensation:- Advanced          |        |        |        |        |        |        |
| Filename:- 101_00010649 512.LMD  |        |        |        |        |        |        |
| Mean Calculation Method:-LOG-LOG |        |        |        |        |        |        |
| Region                           | Number | %Total | %Gated | X-Mean | X-HPCV | Y-Mean |
| ALL                              | 9260   | 92.60  | 100.00 | 244    | 11.05  | ###    |
| ALL                              | 9260   | 92.60  | 100.00 | 244    | 11.05  | 232    |
| Apop                             | 27     | 0.27   | 0.29   | 99.3   | 0.85   | ###    |
| G1                               | 5504   | 55.04  | 59.44  | 194    | 11.05  | ###    |
| G2M                              | 2066   | 20.66  | 22.31  | 376    | 1.66   | ###    |
| I                                | 5610   | 56.10  | 60.58  | 195    | 9.89   | 212    |
| J                                | 1844   | 18.44  | 19.91  | 356    | 1.96   | 298    |
| S                                | 555    | 5.55   | 5.99   | 277    | 0.73   | ###    |

| File:- 101_00010649 512.LMD      |        |        |        |        |        |        |
|----------------------------------|--------|--------|--------|--------|--------|--------|
| Gate:- Ungated                   |        |        |        |        |        |        |
| Compensation:- Advanced          |        |        |        |        |        |        |
| Filename:- 101_00010649 512.LMD  |        |        |        |        |        |        |
| Mean Calculation Method:-LOG-LOG |        |        |        |        |        |        |
| Region                           | Number | %Total | %Gated | X-Mean | X-HPCV | Y-Mean |
| ALL                              | 10000  | 100.00 | 100.00 | 258    | 11.05  | 187    |
| ALL                              | 10000  | 100.00 | 100.00 | 285    | 18.05  | 243    |
| C                                | 9792   | 97.92  | 97.92  | 284    | 18.05  | 243    |
| H                                | 9260   | 92.60  | 92.60  | 244    | 11.05  | 186    |

Institution:

Run Date: 02-May-12, 14:50:47

Protocol: 01\_00010606 476.PRO

Sample ID: Well 01

Listmode Replay: New Protocol

User ID: anajavi

Analysis Date: 03-May-2012, 12:41:23

Acquisition Time/Events: 36.7s / 10000 (UNKNOWN)

Settings File: 00Ciclo Celular de Javi.PRO, 18-Apr-2012, 11:34:20

Tube ID: NoRead

Listmode File: 101\_00010649 512.LMD

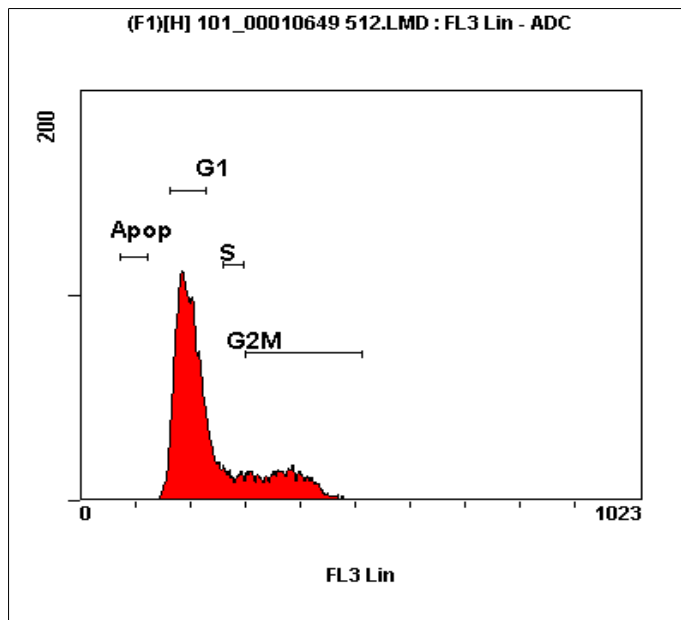

| (F1)[H] 101_00010649 512.LMD : FL3 Lin |        |        |        |        |         |       |
|----------------------------------------|--------|--------|--------|--------|---------|-------|
| Region                                 | Number | %Total | %Gated | X-Mean | HP X-CV | Y-Mea |
| ALL                                    | 9260   | 92.60  | 100.00 | 244    | 11.05   | ###   |
| Apop                                   | 27     | 0.27   | 0.29   | 99.3   | 0.85    | ###   |
| G1                                     | 5504   | 55.04  | 59.44  | 194    | 11.05   | ###   |
| G2M                                    | 2066   | 20.66  | 22.31  | 376    | 1.66    | ###   |
| S                                      | 555    | 5.55   | 5.99   | 277    | 0.73    | ###   |

Institution:  
Protocol: 202\_00010650 513.PRO  
Listmode Replay: New Protocol  
Analysis Date: 03-May-2012, 12:52:21  
Settings File: 00Ciclo Celular de Javi.PRO, 18-Apr-2012, 11:34:20  
Listmode File: 202\_00010650 513.LMD

Run Date: 02-May-12, 14:51:59  
Sample ID: Well 02  
User ID: anajavi  
Acquisition Time/Events: 49.6s / 10000 (UNKNOWN)  
Instrument SN: AL01002 Software Version: CXP v2.2

(F1)[Ungated] 202\_00010650 513.LMD : FS Lin/SS Lin - ADC

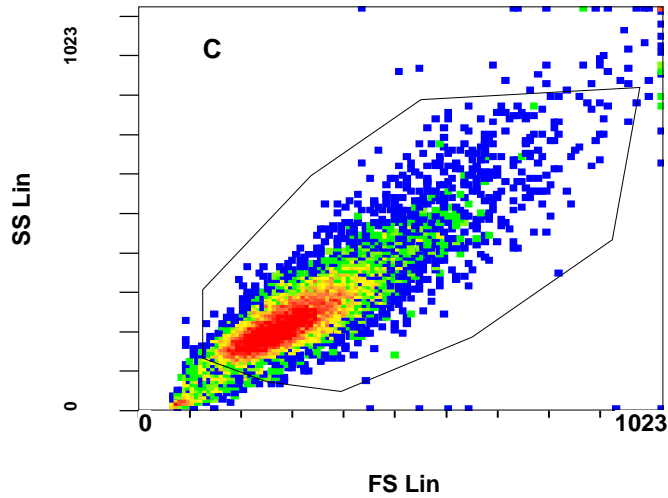

(F1)[Ungated] 202\_00010650 513.LMD : FL3 Lin/AUX - ADC

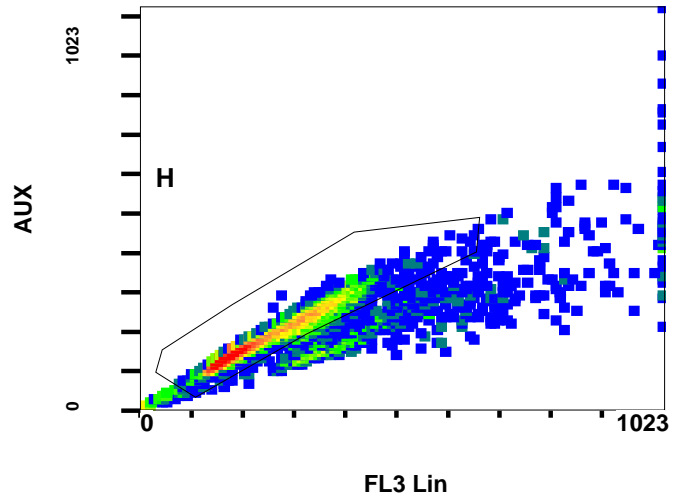

(F1)[H] 202\_00010650 513.LMD : FL3 Lin - ADC

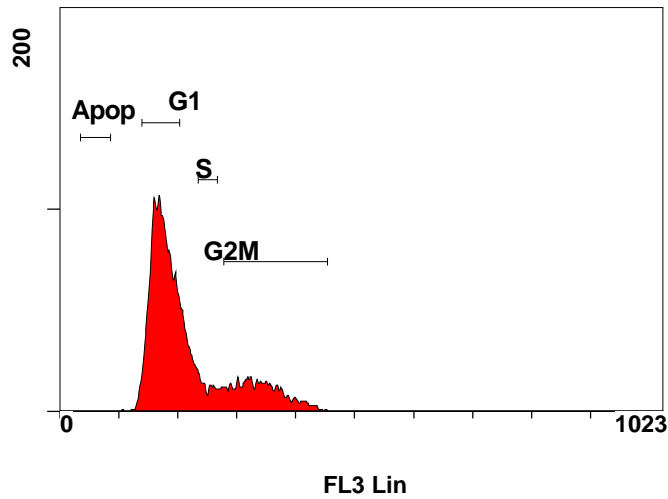

(F1)[H] 202\_00010650 513.LMD : FL3 Lin/SS Lin - ADC

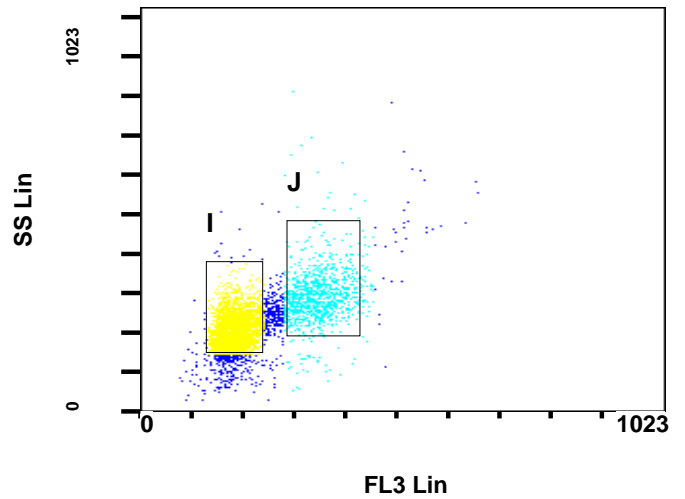



**Statistical Analysis**

**PROGRAM INFORMATION**

| File:- 202_00010650 513.LMD      |        |        |        |        |        |        |
|----------------------------------|--------|--------|--------|--------|--------|--------|
| Gate:- H [H]                     |        |        |        |        |        |        |
| Compensation:- Advanced          |        |        |        |        |        |        |
| Filename:- 202_00010650 513.LMD  |        |        |        |        |        |        |
| Mean Calculation Method:-LOG-LOG |        |        |        |        |        |        |
| Region                           | Number | %Total | %Gated | X-Mean | X-HPCV | Y-Mean |
| ALL                              | 8868   | 88.68  | 100.00 | 223    | 10.72  | ###    |
| ALL                              | 8868   | 88.68  | 100.00 | 223    | 10.72  | 226    |
| Apop                             | 6      | 0.06   | 0.07   | 81.8   | 1.13   | ###    |
| G1                               | 4980   | 49.80  | 56.16  | 172    | 10.72  | ###    |
| G2M                              | 1941   | 19.41  | 21.89  | 345    | 0.37   | ###    |
| I                                | 5703   | 57.03  | 64.31  | 181    | 10.62  | 209    |
| J                                | 1669   | 16.69  | 18.82  | 345    | 0.37   | 297    |
| S                                | 482    | 4.82   | 5.44   | 250    | 1.09   | ###    |

| File:- 202_00010650 513.LMD      |        |        |        |        |        |        |
|----------------------------------|--------|--------|--------|--------|--------|--------|
| Gate:- Ungated                   |        |        |        |        |        |        |
| Compensation:- Advanced          |        |        |        |        |        |        |
| Filename:- 202_00010650 513.LMD  |        |        |        |        |        |        |
| Mean Calculation Method:-LOG-LOG |        |        |        |        |        |        |
| Region                           | Number | %Total | %Gated | X-Mean | X-HPCV | Y-Mean |
| ALL                              | 10000  | 100.00 | 100.00 | 241    | 10.72  | 171    |
| ALL                              | 10000  | 100.00 | 100.00 | 311    | 12.64  | 241    |
| C                                | 9408   | 94.08  | 94.08  | 317    | 12.63  | 247    |
| H                                | 8868   | 88.68  | 88.68  | 223    | 10.72  | 170    |

Institution:

Run Date: 02-May-12, 14:51:59

Protocol: 202\_00010650 513.PRO

Sample ID: Well 02

Listmode Replay: New Protocol

User ID: anajavi

Analysis Date: 03-May-2012, 12:52:21

Acquisition Time/Events: 49.6s / 10000 (UNKNOWN)

Settings File: 00Ciclo Celular de Javi.PRO, 18-Apr-2012, 11:34:20

Tube ID: NoRead

Listmode File: 202\_00010650 513.LMD

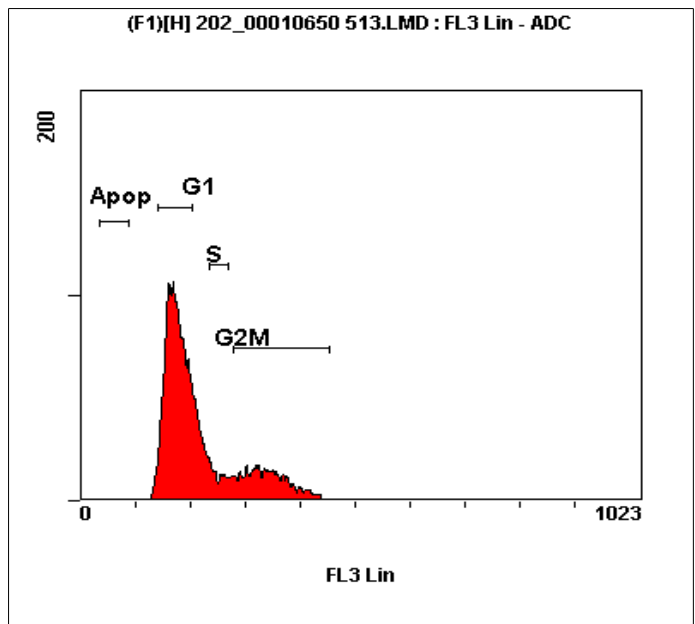

| (F1)[H] 202_00010650 513.LMD : FL3 Lin |        |        |        |        |         |       |
|----------------------------------------|--------|--------|--------|--------|---------|-------|
| Region                                 | Number | %Total | %Gated | X-Mean | HP X-CV | Y-Mea |
| ALL                                    | 8868   | 88.68  | 100.00 | 223    | 10.72   | ###   |
| Apop                                   | 6      | 0.06   | 0.07   | 81.8   | 1.13    | ###   |
| G1                                     | 4980   | 49.80  | 56.16  | 172    | 10.72   | ###   |
| G2M                                    | 1941   | 19.41  | 21.89  | 345    | 0.37    | ###   |
| S                                      | 482    | 4.82   | 5.44   | 250    | 1.09    | ###   |

Institution:  
Protocol: 202\_00010650 513.PRO  
Listmode Replay: New Protocol  
Analysis Date: 03-May-2012, 12:59:02  
Settings File: 00Ciclo Celular de Javi.PRO, 18-Apr-2012, 11:34:20  
Listmode File: 28\_00010640 503.LMD

Run Date: 02-May-12, 14:21:21  
Sample ID: Well 28  
User ID: anajavi  
Acquisition Time/Events: 184.4s / 10000 (UNKNOWN)  
Instrument SN: AL01002 Software Version: CXP v2.2

(F1)[Ungated] 28\_00010640 503.LMD : FS Lin/SS Lin - ADC

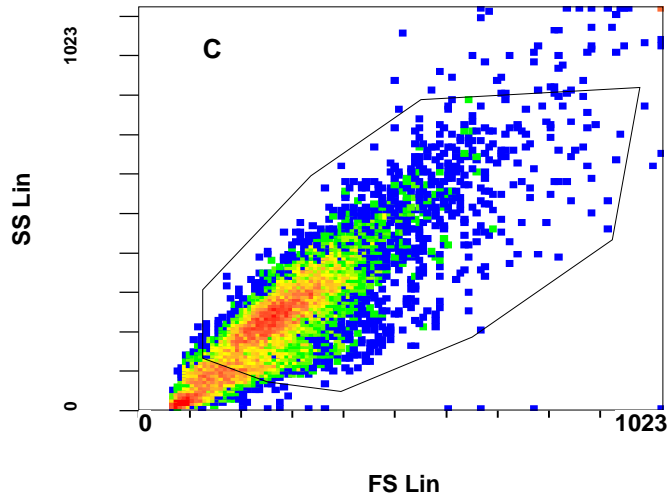

(F1)[Ungated] 28\_00010640 503.LMD : FL3 Lin/AUX - ADC

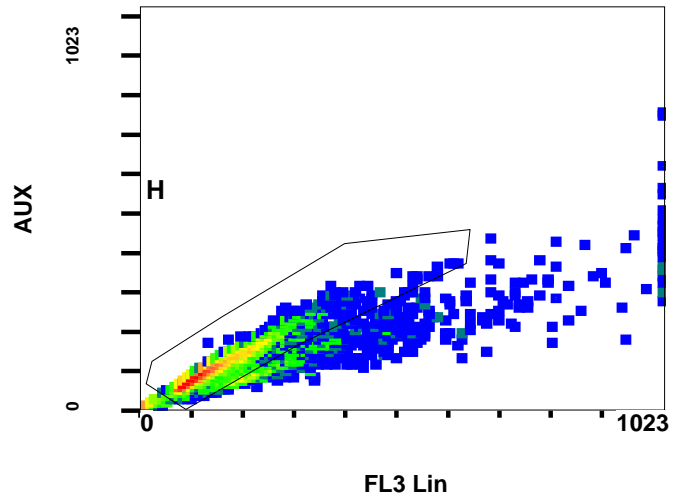

(F1)[H] 28\_00010640 503.LMD : FL3 Lin - ADC

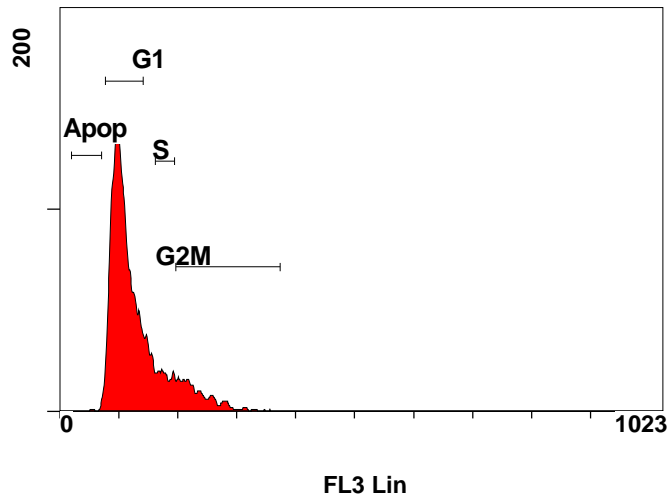

(F1)[H] 28\_00010640 503.LMD : FL3 Lin/SS Lin - ADC

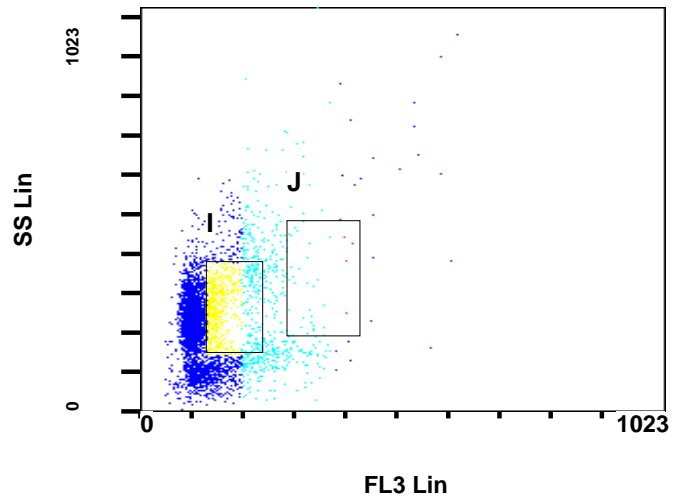

**Statistical Analysis**

**PROGRAM INFORMATION**

| File:- 28_00010640 503.LMD       |        |        |        |        |        |        |
|----------------------------------|--------|--------|--------|--------|--------|--------|
| Gate:- H [H]                     |        |        |        |        |        |        |
| Compensation:- Advanced          |        |        |        |        |        |        |
| Filename:- 28_00010640 503.LMD   |        |        |        |        |        |        |
| Mean Calculation Method:-LOG-LOG |        |        |        |        |        |        |
| Region                           | Number | %Total | %Gated | X-Mean | X-HPCV | Y-Mean |
| ALL                              | 8144   | 81.44  | 100.00 | 137    | 12.30  | ###    |
| ALL                              | 8144   | 81.44  | 100.00 | 137    | 12.30  | 228    |
| Apop                             | 60     | 0.60   | 0.74   | 61     | 0.81   | ###    |
| G1                               | 5458   | 54.58  | 67.02  | 106    | 12.30  | ###    |
| G2M                              | 1173   | 11.73  | 14.40  | 245    | 1.61   | ###    |
| I                                | 1358   | 13.58  | 16.67  | 166    | 4.07   | 262    |
| J                                | 82     | 0.82   | 1.01   | 329    | 0.69   | 316    |
| S                                | 664    | 6.64   | 8.15   | 178    | 0.53   | ###    |

| File:- 28_00010640 503.LMD       |        |        |        |        |        |        |
|----------------------------------|--------|--------|--------|--------|--------|--------|
| Gate:- Ungated                   |        |        |        |        |        |        |
| Compensation:- Advanced          |        |        |        |        |        |        |
| Filename:- 28_00010640 503.LMD   |        |        |        |        |        |        |
| Mean Calculation Method:-LOG-LOG |        |        |        |        |        |        |
| Region                           | Number | %Total | %Gated | X-Mean | X-HPCV | Y-Mean |
| ALL                              | 10000  | 100.00 | 100.00 | 139    | ###    | 94.1   |
| ALL                              | 10000  | 100.00 | 100.00 | 270    | 7.90   | 221    |
| C                                | 7651   | 76.51  | 76.51  | 308    | 7.90   | 263    |
| H                                | 8144   | 81.44  | 81.44  | 137    | 12.30  | 101    |

Institution:

Run Date: 02-May-12, 14:21:21

Protocol: 202\_00010650 513.PRO

Sample ID: Well 28

Listmode Replay: New Protocol

User ID: anajavi

Analysis Date: 03-May-2012, 12:59:02

Acquisition Time/Events: 184.4s / 10000 (UNKNOWN)

Settings File: 00Ciclo Celular de Javi.PRO, 18-Apr-2012, 11:34:20

Tube ID: NoRead

Listmode File: 28\_00010640 503.LMD

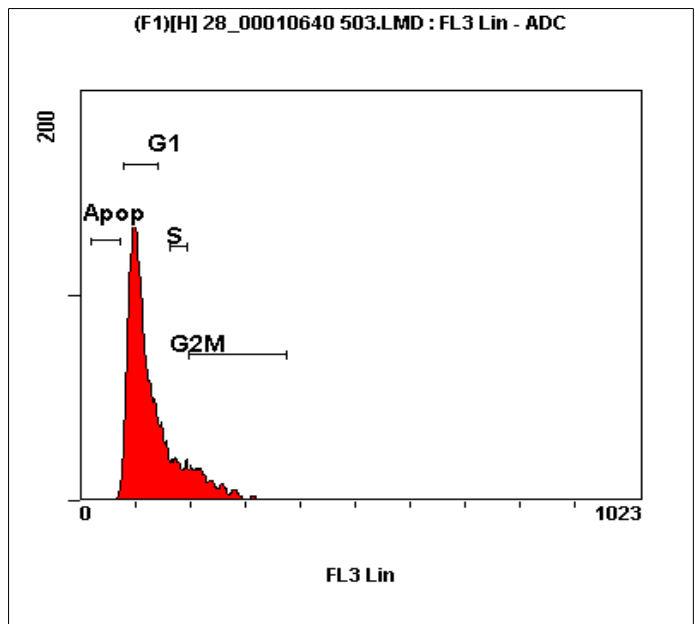

| (F1)[H] 28_00010640 503.LMD : FL3 Lin |        |        |        |        |         |        |
|---------------------------------------|--------|--------|--------|--------|---------|--------|
| Region                                | Number | %Total | %Gated | X-Mean | HP X-CV | Y-Mean |
| ALL                                   | 8144   | 81.44  | 100.00 | 137    | 12.30   | ###    |
| Apop                                  | 60     | 0.60   | 0.74   | 61     | 0.81    | ###    |
| G1                                    | 5458   | 54.58  | 67.02  | 106    | 12.30   | ###    |
| G2M                                   | 1173   | 11.73  | 14.40  | 245    | 1.61    | ###    |
| S                                     | 664    | 6.64   | 8.15   | 178    | 0.53    | ###    |

Institution:  
Protocol: 202\_00010650 513.PRO  
Listmode Replay: New Protocol  
Analysis Date: 03-May-2012, 13:00:00  
Settings File: 00Ciclo Celular de Javi.PRO, 18-Apr-2012, 11:34:20  
Listmode File: 29\_00010641 504.LMD

Run Date: 02-May-12, 14:25:01  
Sample ID: Well 29  
User ID: anajavi  
Acquisition Time/Events: 65.2s / 10000 (UNKNOWN)  
Instrument SN: AL01002 Software Version: CXP v2.2

(F1)[Ungated] 29\_00010641 504.LMD : FS Lin/SS Lin - ADC

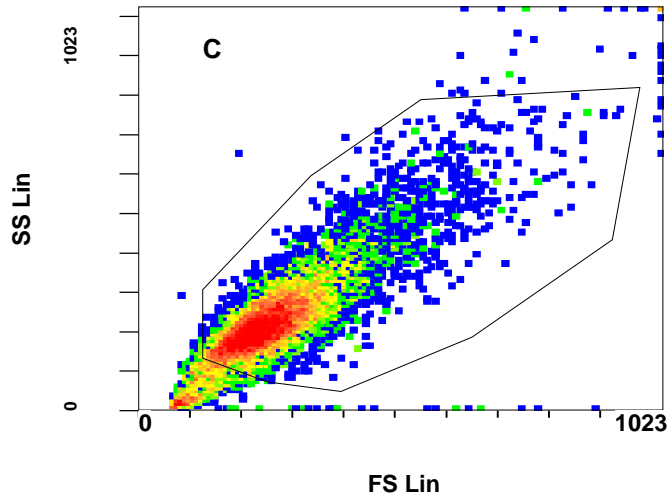

(F1)[Ungated] 29\_00010641 504.LMD : FL3 Lin/AUX - ADC

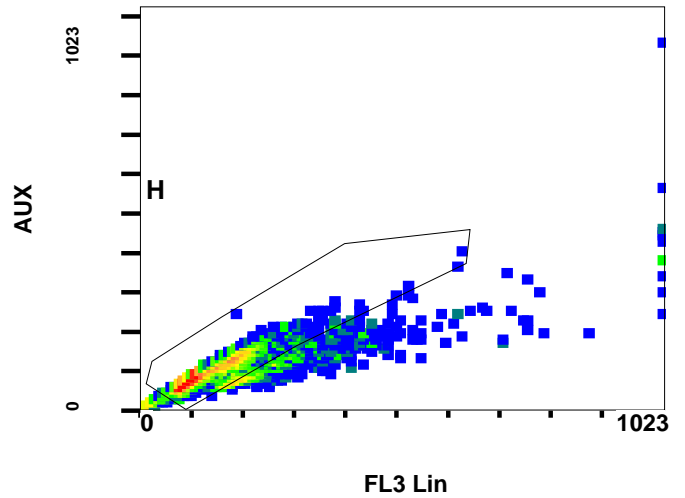

(F1)[H] 29\_00010641 504.LMD : FL3 Lin - ADC

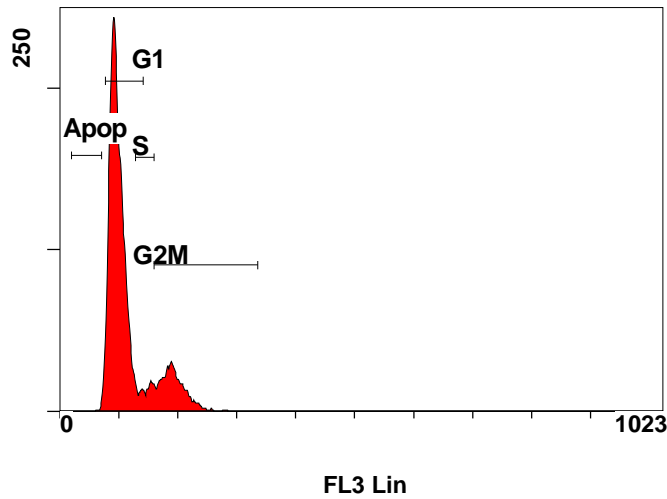

(F1)[H] 29\_00010641 504.LMD : FL3 Lin/SS Lin - ADC

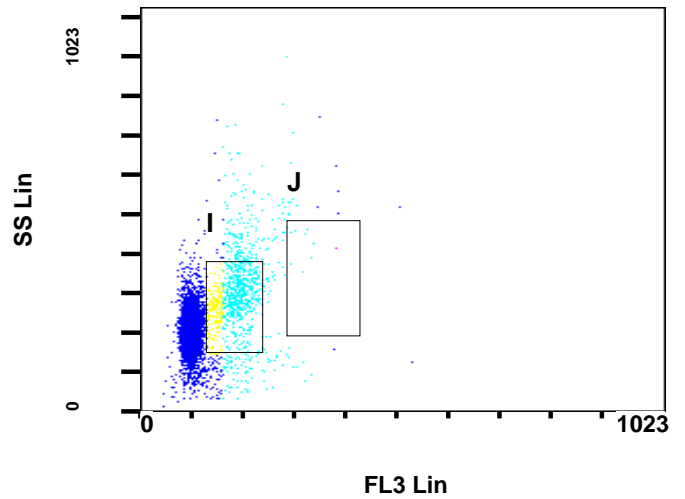

**Statistical Analysis**

**PROGRAM INFORMATION**

| File:- 29_00010641 504.LMD       |        |        |        |        |        |        |
|----------------------------------|--------|--------|--------|--------|--------|--------|
| Gate:- H [H]                     |        |        |        |        |        |        |
| Compensation:- Advanced          |        |        |        |        |        |        |
| Filename:- 29_00010641 504.LMD   |        |        |        |        |        |        |
| Mean Calculation Method:-LOG-LOG |        |        |        |        |        |        |
| Region                           | Number | %Total | %Gated | X-Mean | X-HPCV | Y-Mean |
| ALL                              | 8783   | 87.83  | 100.00 | 119    | 10.29  | ###    |
| ALL                              | 8783   | 87.83  | 100.00 | 119    | 10.29  | 228    |
| Apop                             | 60     | 0.60   | 0.68   | 63     | 1.20   | ###    |
| G1                               | 6660   | 66.60  | 75.83  | 98     | 10.29  | ###    |
| G2M                              | 1626   | 16.26  | 18.51  | 200    | 4.88   | ###    |
| I                                | 1422   | 14.22  | 16.19  | 179    | 3.40   | 283    |
| J                                | 24     | 0.24   | 0.27   | 326    | 0.22   | 393    |
| S                                | 523    | 5.23   | 5.95   | 145    | 2.64   | ###    |

| File:- 29_00010641 504.LMD       |        |        |        |        |        |        |
|----------------------------------|--------|--------|--------|--------|--------|--------|
| Gate:- Ungated                   |        |        |        |        |        |        |
| Compensation:- Advanced          |        |        |        |        |        |        |
| Filename:- 29_00010641 504.LMD   |        |        |        |        |        |        |
| Mean Calculation Method:-LOG-LOG |        |        |        |        |        |        |
| Region                           | Number | %Total | %Gated | X-Mean | X-HPCV | Y-Mean |
| ALL                              | 10000  | 100.00 | 100.00 | 269    | 9.12   | 232    |
| ALL                              | 10000  | 100.00 | 100.00 | 124    | 10.29  | 85.1   |
| C                                | 8951   | 89.51  | 89.51  | 282    | 9.11   | 248    |
| H                                | 8783   | 87.83  | 87.83  | 119    | 10.29  | 87.3   |

Institution:

Run Date: 02-May-12, 14:25:01

Protocol: 202\_00010650 513.PRO

Sample ID: Well 29

Listmode Replay: New Protocol

User ID: anajavi

Analysis Date: 03-May-2012, 13:00:00

Acquisition Time/Events: 65.2s / 10000 (UNKNOWN)

Settings File: 00Ciclo Celular de Javi.PRO, 18-Apr-2012, 11:34:20

Tube ID: NoRead

Listmode File: 29\_00010641 504.LMD

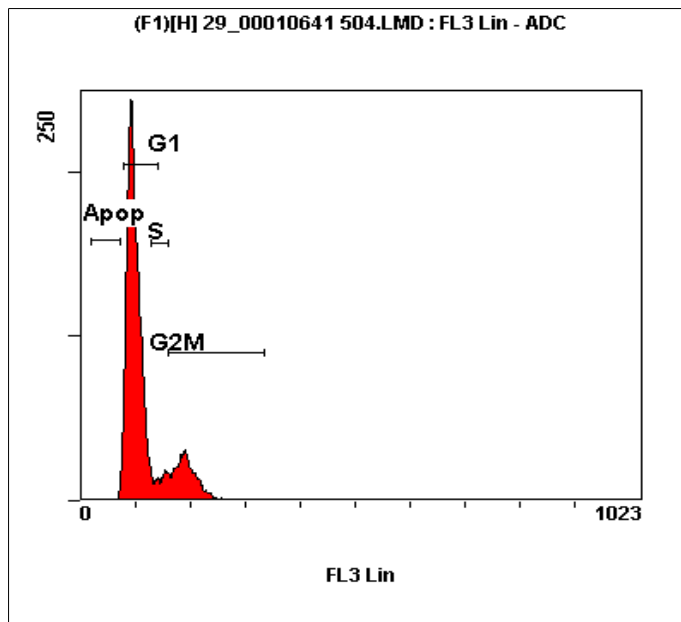

| (F1)[H] 29_00010641 504.LMD : FL3 Lin |        |        |        |        |         |       |
|---------------------------------------|--------|--------|--------|--------|---------|-------|
| Region                                | Number | %Total | %Gated | X-Mean | HP X-CV | Y-Mea |
| ALL                                   | 8783   | 87.83  | 100.00 | 119    | 10.29   | ###   |
| Apop                                  | 60     | 0.60   | 0.68   | 63     | 1.20    | ###   |
| G1                                    | 6660   | 66.60  | 75.83  | 98     | 10.29   | ###   |
| G2M                                   | 1626   | 16.26  | 18.51  | 200    | 4.88    | ###   |
| S                                     | 523    | 5.23   | 5.95   | 145    | 2.64    | ###   |



Institution:  
Protocol: 202\_00010650 513.PRO  
Listmode Replay: New Protocol  
Analysis Date: 03-May-2012, 13:00:43  
Settings File: 00Ciclo Celular de Javi.PRO, 18-Apr-2012, 11:34:20  
Listmode File: 30\_00010642 505.LMD

Run Date: 02-May-12, 14:26:43  
Sample ID: Well 30  
User ID: anajavi  
Acquisition Time/Events: 132.0s / 10000 (UNKNOWN)  
Instrument SN: AL01002 Software Version: CXP v2.2

(F1)[Ungated] 30\_00010642 505.LMD : FS Lin/SS Lin - ADC

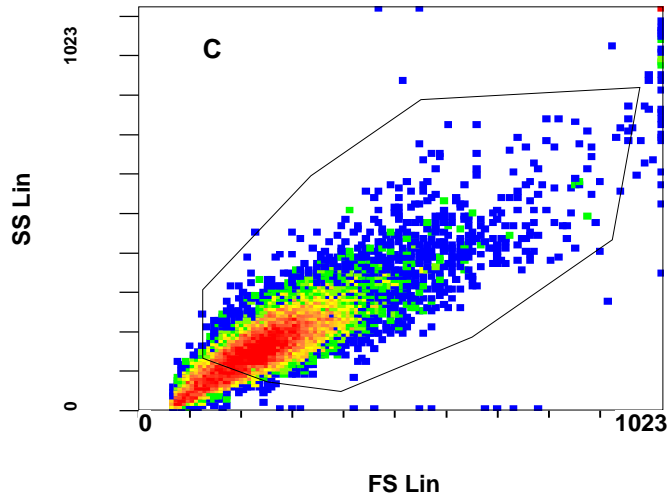

(F1)[Ungated] 30\_00010642 505.LMD : FL3 Lin/AUX - ADC

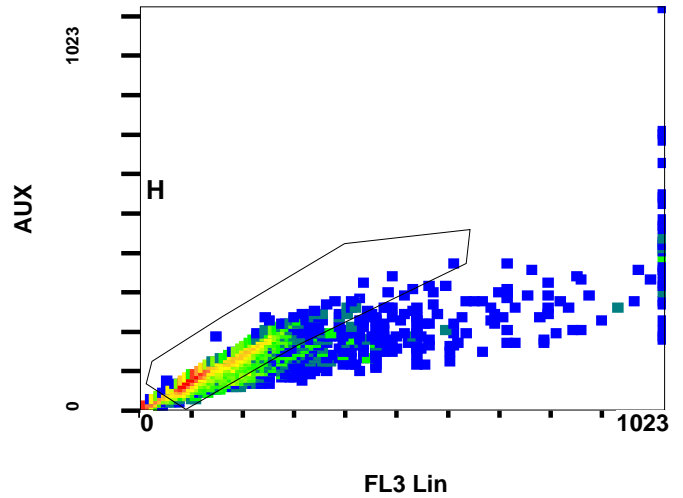

(F1)[H] 30\_00010642 505.LMD : FL3 Lin - ADC

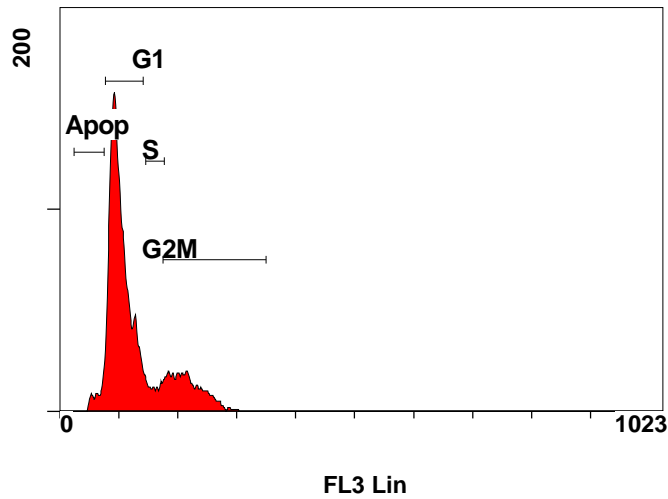

(F1)[H] 30\_00010642 505.LMD : FL3 Lin/SS Lin - ADC

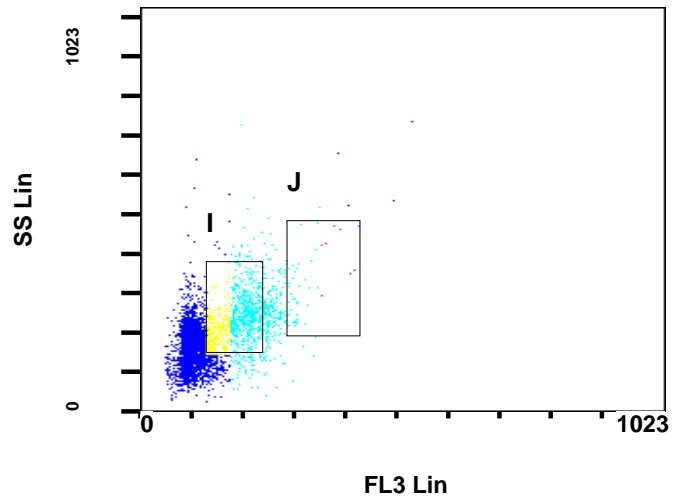

**Statistical Analysis**

**PROGRAM INFORMATION**

| File:- 30_00010642 505.LMD       |        |        |        |        |        |        |
|----------------------------------|--------|--------|--------|--------|--------|--------|
| Gate:- H [H]                     |        |        |        |        |        |        |
| Compensation:- Advanced          |        |        |        |        |        |        |
| Filename:- 30_00010642 505.LMD   |        |        |        |        |        |        |
| Mean Calculation Method:-LOG-LOG |        |        |        |        |        |        |
| Region                           | Number | %Total | %Gated | X-Mean | X-HPCV | Y-Mean |
| ALL                              | 7573   | 75.73  | 100.00 | 131    | 9.43   | ###    |
| ALL                              | 7573   | 75.73  | 100.00 | 131    | 9.43   | 186    |
| Apop                             | 300    | 3.00   | 3.96   | 63.5   | 2.67   | ###    |
| G1                               | 5113   | 51.13  | 67.52  | 102    | 9.43   | ###    |
| G2M                              | 1620   | 16.20  | 21.39  | 222    | 0.66   | ###    |
| I                                | 1594   | 15.94  | 21.05  | 183    | 1.14   | 236    |
| J                                | 79     | 0.79   | 1.04   | 319    | 0.27   | 324    |
| S                                | 478    | 4.78   | 6.31   | 161    | 0.65   | ###    |

| File:- 30_00010642 505.LMD       |        |        |        |        |        |        |
|----------------------------------|--------|--------|--------|--------|--------|--------|
| Gate:- Ungated                   |        |        |        |        |        |        |
| Compensation:- Advanced          |        |        |        |        |        |        |
| Filename:- 30_00010642 505.LMD   |        |        |        |        |        |        |
| Mean Calculation Method:-LOG-LOG |        |        |        |        |        |        |
| Region                           | Number | %Total | %Gated | X-Mean | X-HPCV | Y-Mean |
| ALL                              | 10000  | 100.00 | 100.00 | 124    | ###    | 82     |
| ALL                              | 10000  | 100.00 | 100.00 | 266    | 14.45  | 180    |
| C                                | 7823   | 78.23  | 78.23  | 294    | 11.68  | 203    |
| H                                | 7573   | 75.73  | 75.73  | 131    | 9.43   | 94.2   |

Institution:

Run Date: 02-May-12, 14:26:43

Protocol: 202\_00010650 513.PRO

Sample ID: Well 30

Listmode Replay: New Protocol

User ID: anajavi

Analysis Date: 03-May-2012, 13:00:43

Acquisition Time/Events: 132.0s / 10000 (UNKNOWN)

Settings File: 00Ciclo Celular de Javi.PRO, 18-Apr-2012, 11:34:20

Tube ID: NoRead

Listmode File: 30\_00010642 505.LMD

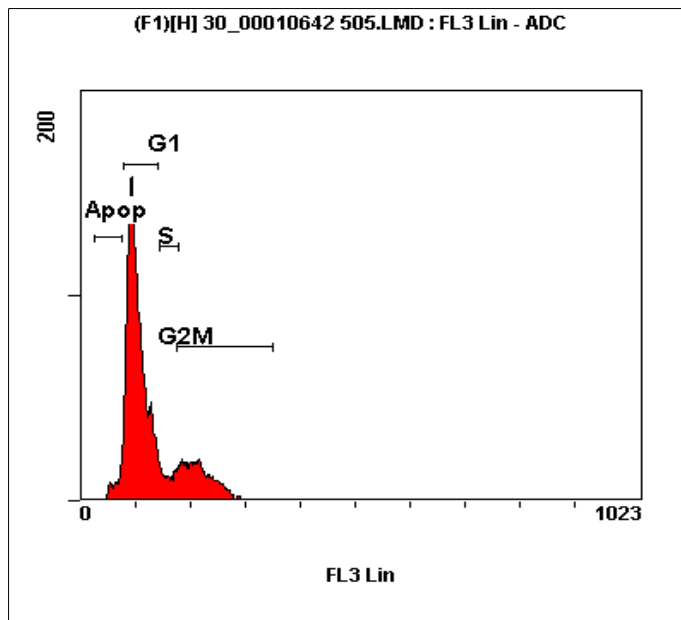

| (F1)[H] 30_00010642 505.LMD : FL3 Lin |        |        |        |        |         |       |
|---------------------------------------|--------|--------|--------|--------|---------|-------|
| Region                                | Number | %Total | %Gated | X-Mean | HP X-CV | Y-Mea |
| ALL                                   | 7573   | 75.73  | 100.00 | 131    | 9.43    | ###   |
| Apop                                  | 300    | 3.00   | 3.96   | 63.5   | 2.67    | ###   |
| G1                                    | 5113   | 51.13  | 67.52  | 102    | 9.43    | ###   |
| G2M                                   | 1620   | 16.20  | 21.39  | 222    | 0.66    | ###   |
| S                                     | 478    | 4.78   | 6.31   | 161    | 0.65    | ###   |

Institution:  
Protocol: 202\_00010650 513.PRO  
Listmode Replay: New Protocol  
Analysis Date: 03-May-2012, 13:01:19  
Settings File: 00Ciclo Celular de Javi.PRO, 18-Apr-2012, 11:34:20  
Listmode File: 31\_00010643 506.LMD

Run Date: 02-May-12, 14:29:32  
Sample ID: Well 31  
User ID: anajavi  
Acquisition Time/Events: 86.3s / 10000 (UNKNOWN)  
Instrument SN: AL01002 Software Version: CXP v2.2

(F1)[Ungated] 31\_00010643 506.LMD : FS Lin/SS Lin - ADC

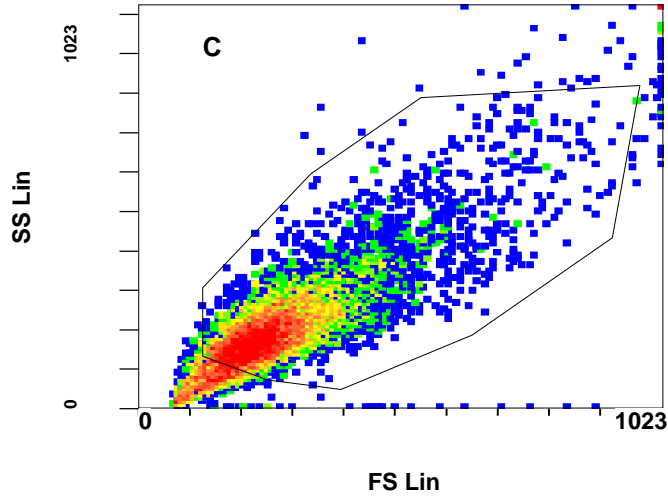

(F1)[Ungated] 31\_00010643 506.LMD : FL3 Lin/AUX - ADC

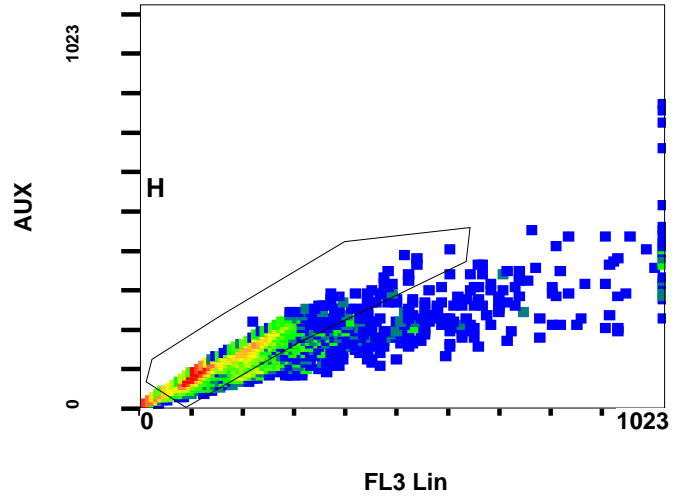

(F1)[H] 31\_00010643 506.LMD : FL3 Lin - ADC

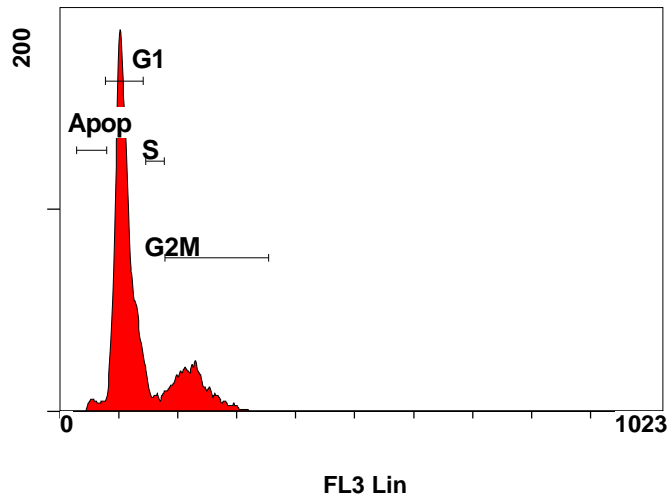

(F1)[H] 31\_00010643 506.LMD : FL3 Lin/SS Lin - ADC

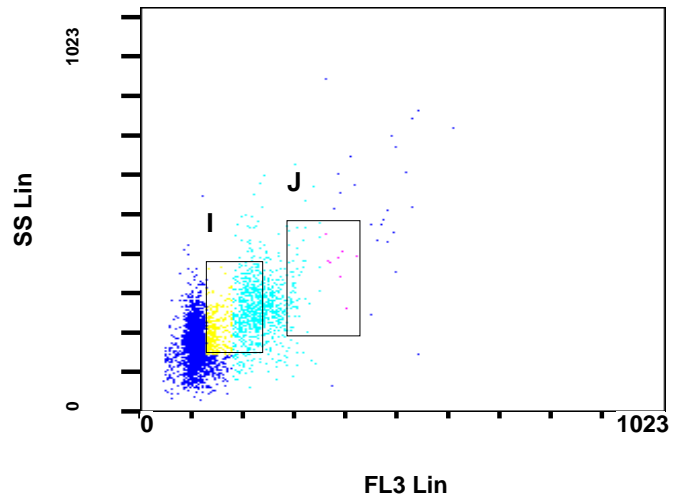

**Statistical Analysis**

**PROGRAM INFORMATION**

| File:- 31_00010643 506.LMD       |        |        |        |        |        |        |
|----------------------------------|--------|--------|--------|--------|--------|--------|
| Gate:- H [H]                     |        |        |        |        |        |        |
| Compensation:- Advanced          |        |        |        |        |        |        |
| Filename:- 31_00010643 506.LMD   |        |        |        |        |        |        |
| Mean Calculation Method:-LOG-LOG |        |        |        |        |        |        |
| Region                           | Number | %Total | %Gated | X-Mean | X-HPCV | Y-Mean |
| ALL                              | 8024   | 80.24  | 100.00 | 140    | 9.37   | ###    |
| ALL                              | 8024   | 80.24  | 100.00 | 140    | 9.37   | 198    |
| Apop                             | 214    | 2.14   | 2.67   | 62.6   | 2.96   | ###    |
| G1                               | 5513   | 55.13  | 68.71  | 108    | 9.37   | ###    |
| G2M                              | 1822   | 18.22  | 22.71  | 231    | 1.02   | ###    |
| I                                | 1786   | 17.86  | 22.26  | 184    | 4.06   | 237    |
| J                                | 137    | 1.37   | 1.71   | 315    | 0.52   | 337    |
| S                                | 373    | 3.73   | 4.65   | 159    | 1.59   | ###    |

| File:- 31_00010643 506.LMD       |        |        |        |        |        |        |
|----------------------------------|--------|--------|--------|--------|--------|--------|
| Gate:- Ungated                   |        |        |        |        |        |        |
| Compensation:- Advanced          |        |        |        |        |        |        |
| Filename:- 31_00010643 506.LMD   |        |        |        |        |        |        |
| Mean Calculation Method:-LOG-LOG |        |        |        |        |        |        |
| Region                           | Number | %Total | %Gated | X-Mean | X-HPCV | Y-Mean |
| ALL                              | 10000  | 100.00 | 100.00 | 270    | 16.55  | 203    |
| ALL                              | 10000  | 100.00 | 100.00 | 144    | 9.37   | 95.7   |
| C                                | 8371   | 83.71  | 83.71  | 287    | 14.28  | 219    |
| H                                | 8024   | 80.24  | 80.24  | 140    | 9.37   | 102    |

Institution:

Run Date: 02-May-12, 14:29:32

Protocol: 202\_00010650 513.PRO

Sample ID: Well 31

Listmode Replay: New Protocol

User ID: anajavi

Analysis Date: 03-May-2012, 13:01:19

Acquisition Time/Events: 86.3s / 10000 (UNKNOWN)

Settings File: 00Ciclo Celular de Javi.PRO, 18-Apr-2012, 11:34:20

Tube ID: NoRead

Listmode File: 31\_00010643 506.LMD

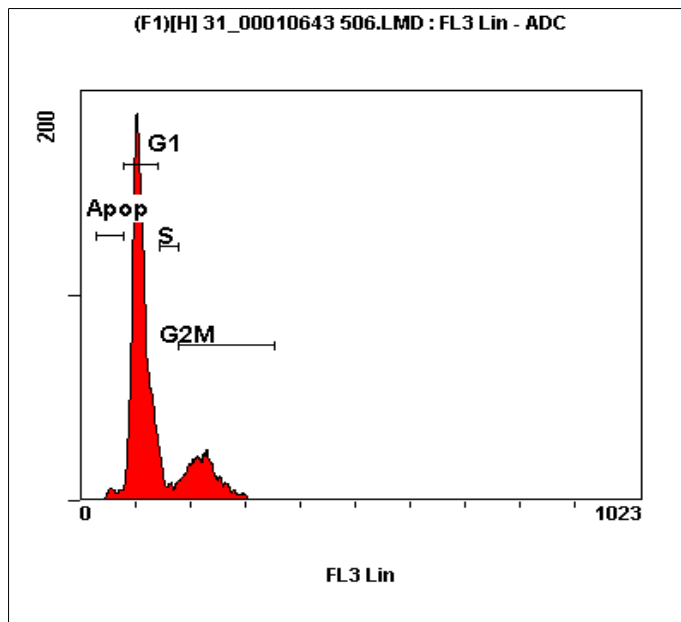

| (F1)[H] 31_00010643 506.LMD : FL3 Lin |        |        |        |        |         |       |
|---------------------------------------|--------|--------|--------|--------|---------|-------|
| Region                                | Number | %Total | %Gated | X-Mean | HP X-CV | Y-Mea |
| ALL                                   | 8024   | 80.24  | 100.00 | 140    | 9.37    | ###   |
| Apop                                  | 214    | 2.14   | 2.67   | 62.6   | 2.96    | ###   |
| G1                                    | 5513   | 55.13  | 68.71  | 108    | 9.37    | ###   |
| G2M                                   | 1822   | 18.22  | 22.71  | 231    | 1.02    | ###   |
| S                                     | 373    | 3.73   | 4.65   | 159    | 1.59    | ###   |

Institution:  
Protocol: 202\_00010650 513.PRO  
Listmode Replay: New Protocol  
Analysis Date: 03-May-2012, 13:01:55  
Settings File: 00Ciclo Celular de Javi.PRO, 18-Apr-2012, 11:34:20  
Listmode File: 33\_00010647 510.LMD

Run Date: 02-May-12, 14:41:07  
Sample ID: Well 33  
User ID: anajavi  
Acquisition Time/Events: 135.4s / 10000 (UNKNOWN)  
Instrument SN: AL01002 Software Version: CXP v2.2

(F1)[Ungated] 33\_00010647 510.LMD : FS Lin/SS Lin - ADC

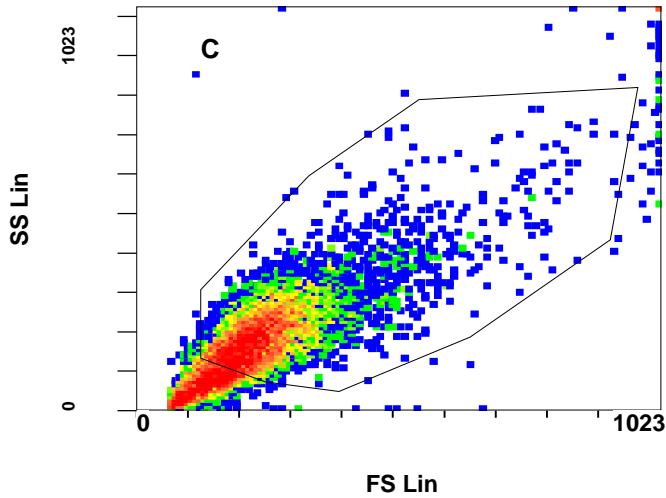

(F1)[Ungated] 33\_00010647 510.LMD : FL3 Lin/AUX - ADC

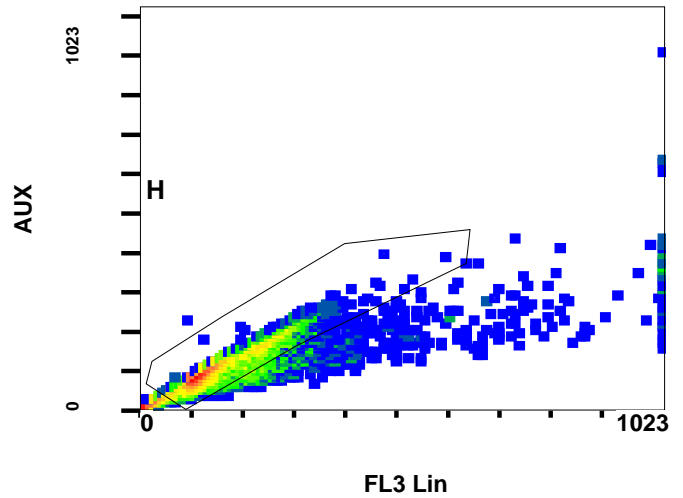

(F1)[H] 33\_00010647 510.LMD : FL3 Lin - ADC

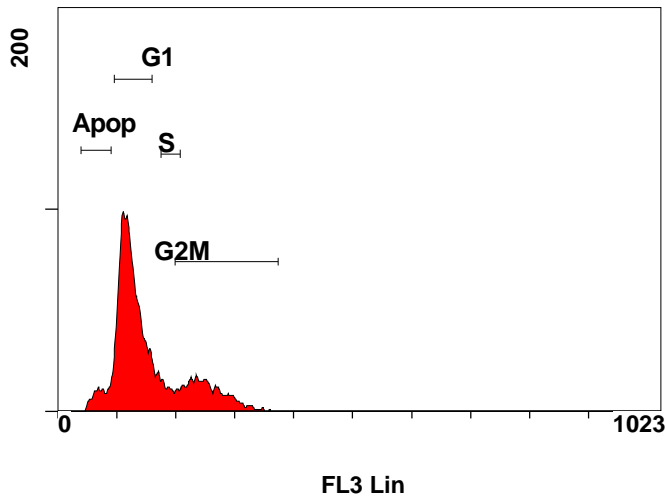

(F1)[H] 33\_00010647 510.LMD : FL3 Lin/SS Lin - ADC

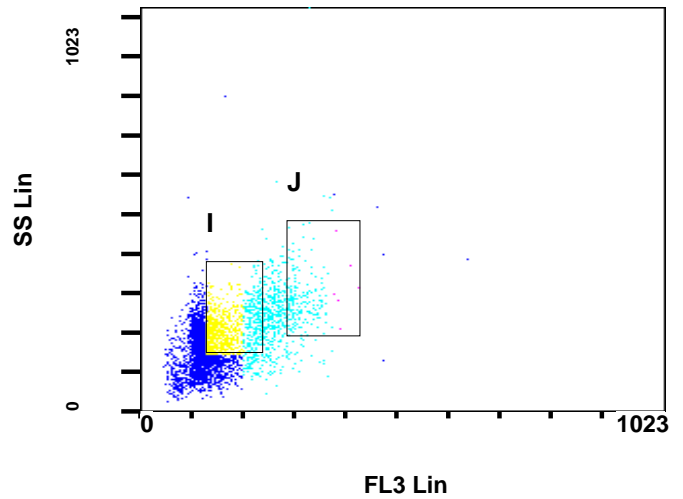

**Statistical Analysis**

**PROGRAM INFORMATION**

| File:- 33_00010647 510.LMD       |        |        |        |        |        |        |
|----------------------------------|--------|--------|--------|--------|--------|--------|
| Gate:- H [H]                     |        |        |        |        |        |        |
| Compensation:- Advanced          |        |        |        |        |        |        |
| Filename:- 33_00010647 510.LMD   |        |        |        |        |        |        |
| Mean Calculation Method:-LOG-LOG |        |        |        |        |        |        |
| Region                           | Number | %Total | %Gated | X-Mean | X-HPCV | Y-Mean |
| ALL                              | 6886   | 68.86  | 100.00 | 158    | 10.71  | ###    |
| ALL                              | 6886   | 68.86  | 100.00 | 158    | 10.71  | 185    |
| Apop                             | 447    | 4.47   | 6.49   | 71.2   | 1.06   | ###    |
| G1                               | 4021   | 40.21  | 58.39  | 123    | 10.71  | ###    |
| G2M                              | 1655   | 16.55  | 24.03  | 258    | 2.49   | ###    |
| I                                | 1843   | 18.43  | 26.76  | 171    | 4.81   | 212    |
| J                                | 364    | 3.64   | 5.29   | 317    | 0.77   | 284    |
| S                                | 440    | 4.40   | 6.39   | 190    | 1.87   | ###    |

| File:- 33_00010647 510.LMD       |        |        |        |        |        |        |
|----------------------------------|--------|--------|--------|--------|--------|--------|
| Gate:- Ungated                   |        |        |        |        |        |        |
| Compensation:- Advanced          |        |        |        |        |        |        |
| Filename:- 33_00010647 510.LMD   |        |        |        |        |        |        |
| Mean Calculation Method:-LOG-LOG |        |        |        |        |        |        |
| Region                           | Number | %Total | %Gated | X-Mean | X-HPCV | Y-Mean |
| ALL                              | 10000  | 100.00 | 100.00 | 141    | 517.09 | 88.4   |
| ALL                              | 10000  | 100.00 | 100.00 | 232    | 4.79   | 169    |
| C                                | 6982   | 69.82  | 69.82  | 266    | 2.85   | 205    |
| H                                | 6886   | 68.86  | 68.86  | 158    | 10.71  | 109    |



Institution:

Run Date: 02-May-12, 14:41:07

Protocol: 202\_00010650 513.PRO

Sample ID: Well 33

Listmode Replay: New Protocol

User ID: anajavi

Analysis Date: 03-May-2012, 13:01:56

Acquisition Time/Events: 135.4s / 10000 (UNKNOWN)

Settings File: 00Ciclo Celular de Javi.PRO, 18-Apr-2012, 11:34:20

Tube ID: NoRead

Listmode File: 33\_00010647 510.LMD

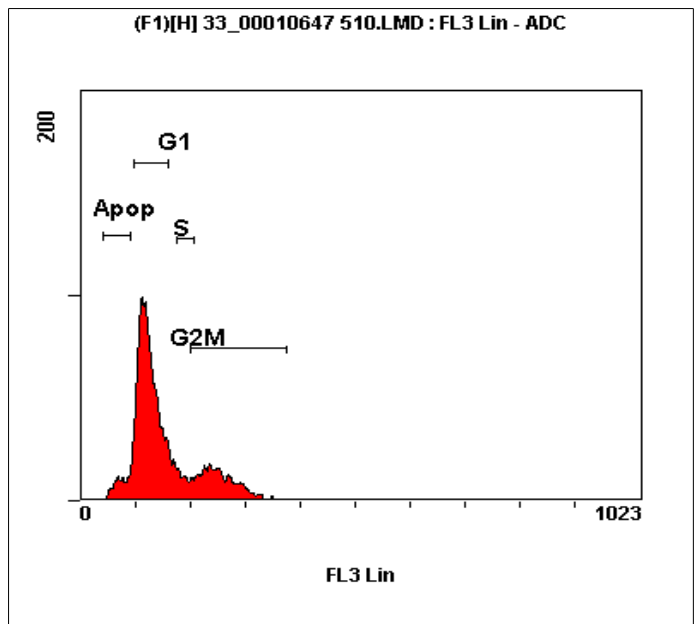

| (F1)[H] 33_00010647 510.LMD : FL3 Lin |        |        |        |        |         |       |
|---------------------------------------|--------|--------|--------|--------|---------|-------|
| Region                                | Number | %Total | %Gated | X-Mean | HP X-CV | Y-Mea |
| ALL                                   | 6886   | 68.86  | 100.00 | 158    | 10.71   | ###   |
| Apop                                  | 447    | 4.47   | 6.49   | 71.2   | 1.06    | ###   |
| G1                                    | 4021   | 40.21  | 58.39  | 123    | 10.71   | ###   |
| G2M                                   | 1655   | 16.55  | 24.03  | 258    | 2.49    | ###   |
| S                                     | 440    | 4.40   | 6.39   | 190    | 1.87    | ###   |

Institution:  
Protocol: 202\_00010650 513.PRO  
Listmode Replay: New Protocol  
Analysis Date: 03-May-2012, 13:02:36  
Settings File: 00Ciclo Celular de Javi.PRO, 18-Apr-2012, 11:34:20  
Listmode File: 34\_00010648 511.LMD

Run Date: 02-May-12, 14:43:58  
Sample ID: Well 34  
User ID: anajavi  
Acquisition Time/Events: 146.0s / 10000 (UNKNOWN)  
Instrument SN: AL01002 Software Version: CXP v2.2

(F1)[Ungated] 34\_00010648 511.LMD : FS Lin/SS Lin - ADC

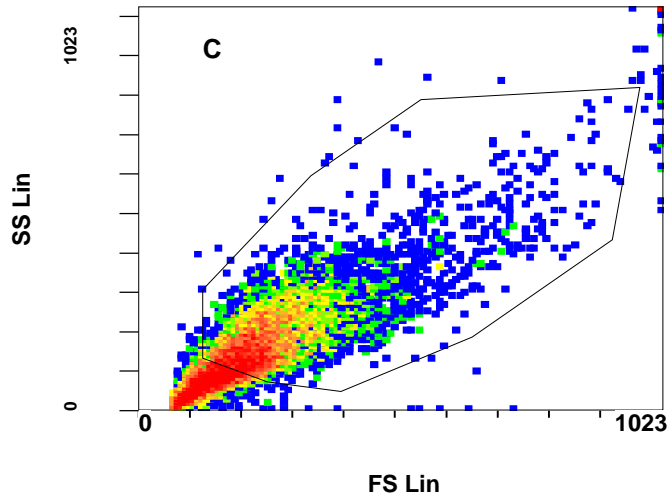

(F1)[Ungated] 34\_00010648 511.LMD : FL3 Lin/AUX - ADC

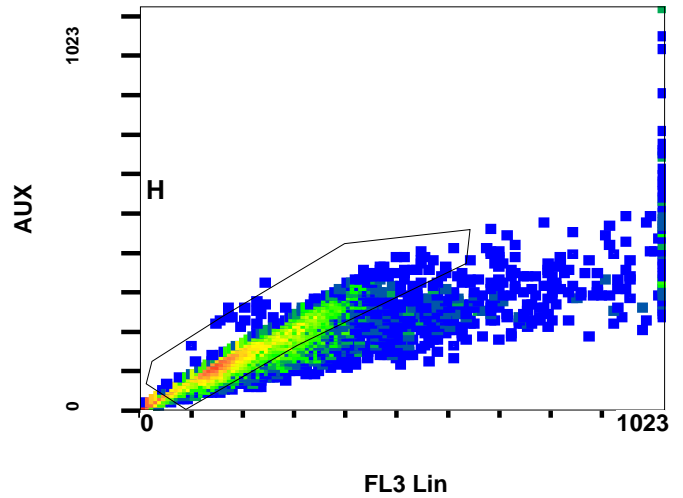

(F1)[H] 34\_00010648 511.LMD : FL3 Lin - ADC

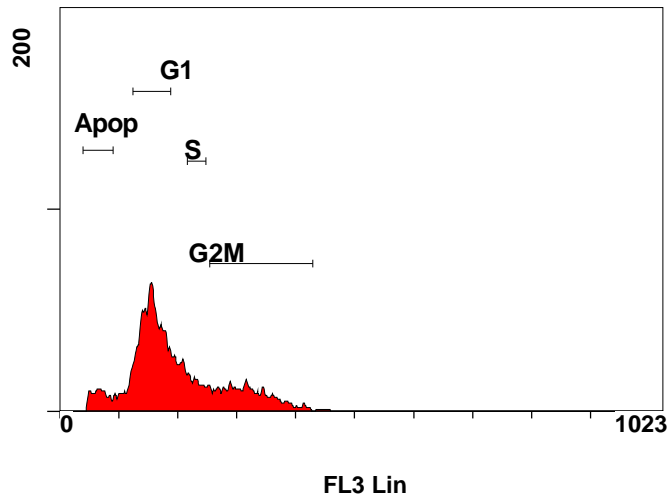

(F1)[H] 34\_00010648 511.LMD : FL3 Lin/SS Lin - ADC

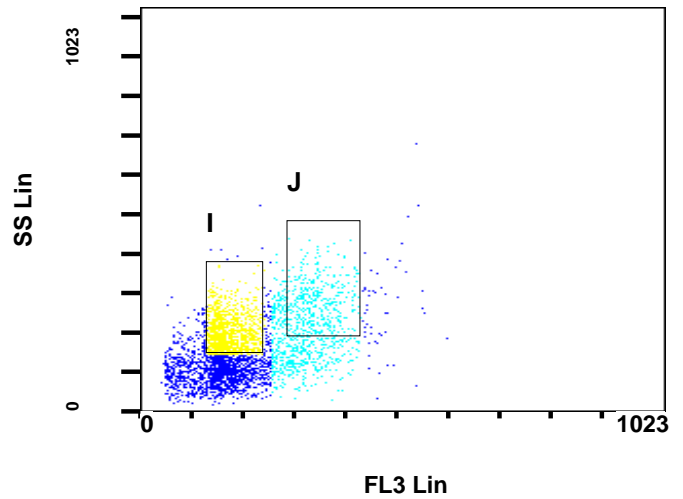

**Statistical Analysis**

**PROGRAM INFORMATION**

| File:- 34_00010648 511.LMD       |        |        |        |        |        |        |
|----------------------------------|--------|--------|--------|--------|--------|--------|
| Gate:- H [H]                     |        |        |        |        |        |        |
| Compensation:- Advanced          |        |        |        |        |        |        |
| Filename:- 34_00010648 511.LMD   |        |        |        |        |        |        |
| Mean Calculation Method:-LOG-LOG |        |        |        |        |        |        |
| Region                           | Number | %Total | %Gated | X-Mean | X-HPCV | Y-Mean |
| ALL                              | 6937   | 69.37  | 100.00 | 205    | 8.45   | ###    |
| ALL                              | 6937   | 69.37  | 100.00 | 205    | 8.45   | 168    |
| Apop                             | 469    | 4.69   | 6.76   | 66.9   | 1.72   | ###    |
| G1                               | 2929   | 29.29  | 42.22  | 156    | 8.45   | ###    |
| G2M                              | 1693   | 16.93  | 24.41  | 323    | 0.50   | ###    |
| I                                | 2028   | 20.28  | 29.23  | 172    | 7.21   | 206    |
| J                                | 819    | 8.19   | 11.81  | 343    | 0.22   | 279    |
| S                                | 550    | 5.50   | 7.93   | 231    | 0.93   | ###    |

| File:- 34_00010648 511.LMD       |        |        |        |        |        |        |
|----------------------------------|--------|--------|--------|--------|--------|--------|
| Gate:- Ungated                   |        |        |        |        |        |        |
| Compensation:- Advanced          |        |        |        |        |        |        |
| Filename:- 34_00010648 511.LMD   |        |        |        |        |        |        |
| Mean Calculation Method:-LOG-LOG |        |        |        |        |        |        |
| Region                           | Number | %Total | %Gated | X-Mean | X-HPCV | Y-Mean |
| ALL                              | 10000  | 100.00 | 100.00 | 198    | 396.16 | 123    |
| ALL                              | 10000  | 100.00 | 100.00 | 237    | 4.00   | 164    |
| C                                | 6532   | 65.32  | 65.32  | 284    | 4.02   | 206    |
| H                                | 6937   | 69.37  | 69.37  | 205    | 8.45   | 142    |

Institution:

Run Date: 02-May-12, 14:43:58

Protocol: 202\_00010650 513.PRO

Sample ID: Well 34

Listmode Replay: New Protocol

User ID: anajavi

Analysis Date: 03-May-2012, 13:02:36

Acquisition Time/Events: 146.0s / 10000 (UNKNOWN)

Settings File: 00Ciclo Celular de Javi.PRO, 18-Apr-2012, 11:34:20

Tube ID: NoRead

Listmode File: 34\_00010648 511.LMD

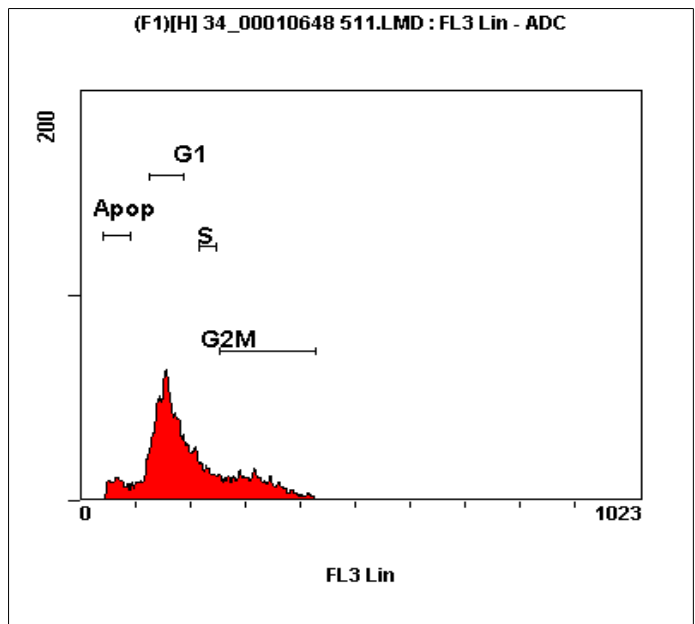

| (F1)[H] 34_00010648 511.LMD : FL3 Lin |        |        |        |        |         |       |
|---------------------------------------|--------|--------|--------|--------|---------|-------|
| Region                                | Number | %Total | %Gated | X-Mean | HP X-CV | Y-Mea |
| ALL                                   | 6937   | 69.37  | 100.00 | 205    | 8.45    | ###   |
| Apop                                  | 469    | 4.69   | 6.76   | 66.9   | 1.72    | ###   |
| G1                                    | 2929   | 29.29  | 42.22  | 156    | 8.45    | ###   |
| G2M                                   | 1693   | 16.93  | 24.41  | 323    | 0.50    | ###   |
| S                                     | 550    | 5.50   | 7.93   | 231    | 0.93    | ###   |

Institution:  
Protocol: 01\_00010606 476.PRO  
Listmode Replay: New Protocol  
Analysis Date: 03-May-2012, 12:36:36  
Settings File: 00Ciclo Celular de Javi.PRO, 18-Apr-2012, 11:34:20  
Listmode File: 03\_00010635 498.LMD

Run Date: 02-May-12, 14:01:20  
Sample ID: Well 01  
User ID: anajavi  
Acquisition Time/Events: 93.8s / 10000 (UNKNOWN)  
Instrument SN: AL01002 Software Version: CXP v2.2

(F1)[Ungated] 03\_00010635 498.LMD : FS Lin/SS Lin - ADC

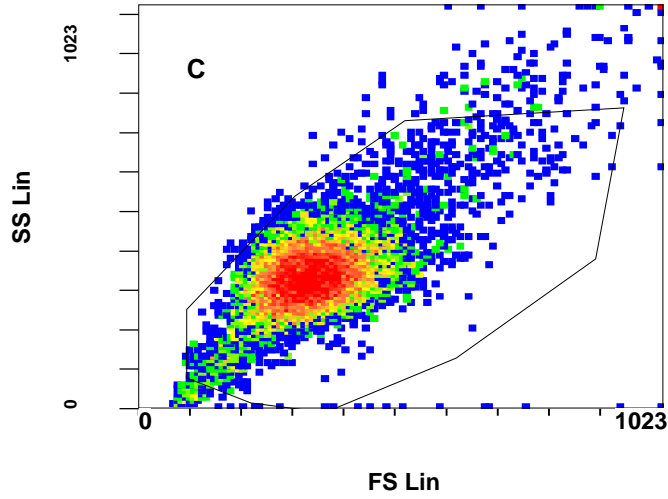

(F1)[Ungated] 03\_00010635 498.LMD : FL3 Lin/AUX - ADC

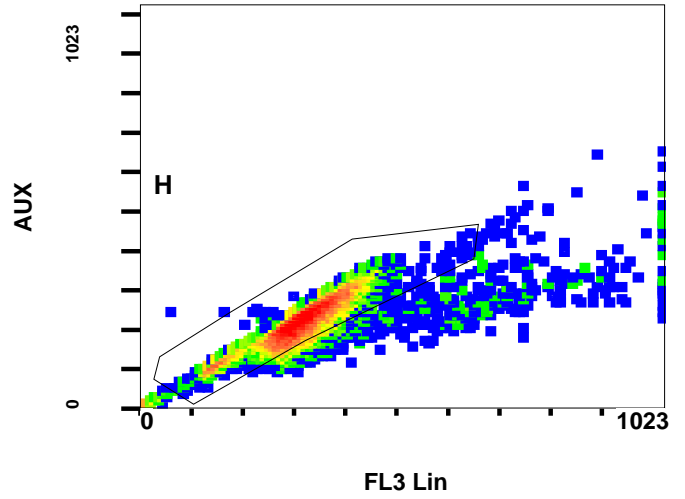

(F1)[H] 03\_00010635 498.LMD : FL3 Lin - ADC

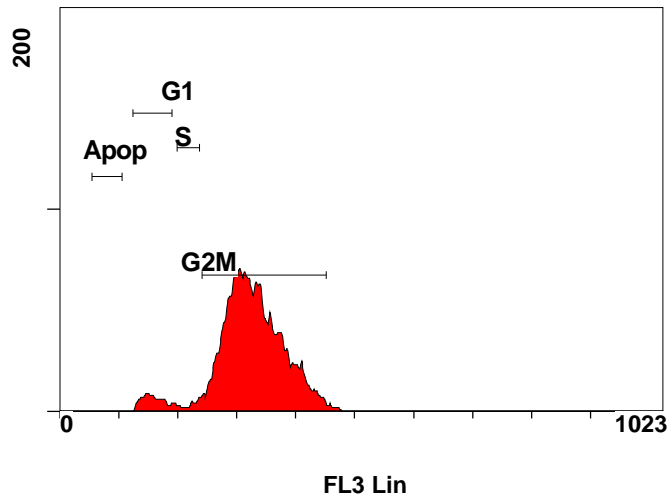

(F1)[H] 03\_00010635 498.LMD : FL3 Lin/SS Lin - ADC

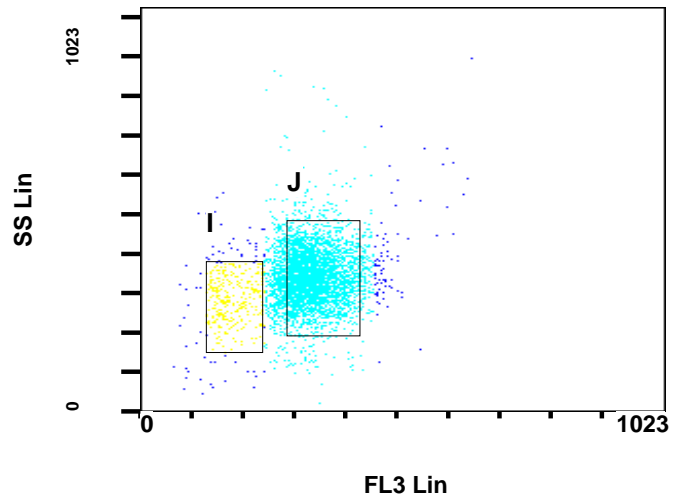

**Statistical Analysis**

**PROGRAM INFORMATION**

File:- 03\_00010635 498.LMD

Gate:- H [H]

Compensation:- Advanced

Filename:- 03\_00010635 498.LMD

Mean Calculation Method:-LOG-LOG

| Region | Number | %Total | %Gated | X-Mean | X-HPCV | Y-Mean |
|--------|--------|--------|--------|--------|--------|--------|
| ALL    | 8956   | 89.56  | 100.00 | 321    | 9.23   | ###    |
| ALL    | 8956   | 89.56  | 100.00 | 321    | 9.23   | 340    |
| Apop   | 22     | 0.22   | 0.25   | 84.5   | 1.07   | ###    |
| G1     | 488    | 4.88   | 5.45   | 156    | 1.16   | ###    |
| G2M    | 8029   | 80.29  | 89.65  | 332    | 9.23   | ###    |
| I      | 615    | 6.15   | 6.87   | 177    | 0.80   | 285    |
| J      | 6258   | 62.58  | 69.87  | 340    | 8.59   | 341    |
| S      | 191    | 1.91   | 2.13   | 221    | 0.33   | ###    |

File:- 03\_00010635 498.LMD

Gate:- Ungated

Compensation:- Advanced

Filename:- 03\_00010635 498.LMD

Mean Calculation Method:-LOG-LOG

| Region | Number | %Total | %Gated | X-Mean | X-HPCV | Y-Mean |
|--------|--------|--------|--------|--------|--------|--------|
| ALL    | 10000  | 100.00 | 100.00 | 352    | 6.00   | 347    |
| ALL    | 10000  | 100.00 | 100.00 | 328    | 8.32   | 220    |
| C      | 9721   | 97.21  | 97.21  | 348    | 6.00   | 342    |
| H      | 8956   | 89.56  | 89.56  | 321    | 9.23   | 225    |

Institution:

Run Date: 02-May-12, 14:01:20

Protocol: 01\_00010606 476.PRO

Sample ID: Well 01

Listmode Replay: New Protocol

User ID: anajavi

Analysis Date: 03-May-2012, 12:36:36

Acquisition Time/Events: 93.8s / 10000 (UNKNOWN)

Settings File: 00Ciclo Celular de Javi.PRO, 18-Apr-2012, 11:34:20

Tube ID: NoRead

Listmode File: 03\_00010635 498.LMD

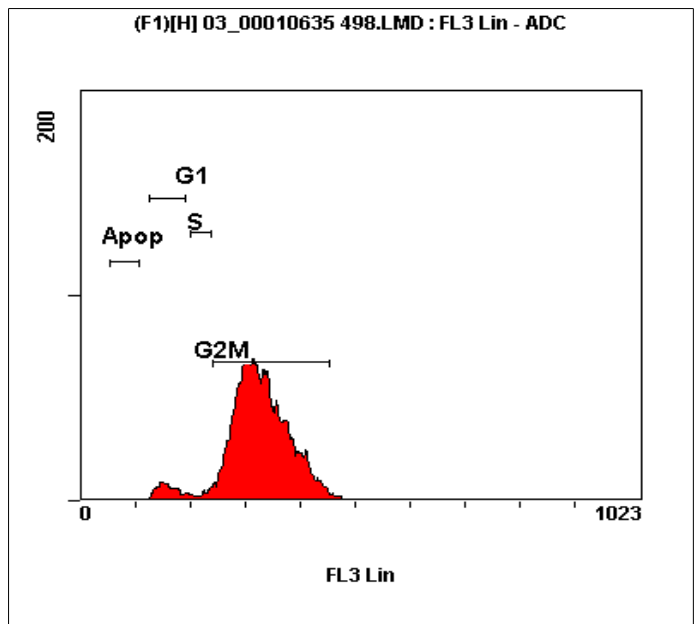

| (F1)[H] 03_00010635 498.LMD : FL3 Lin |        |        |        |        |         |       |
|---------------------------------------|--------|--------|--------|--------|---------|-------|
| Region                                | Number | %Total | %Gated | X-Mean | HP X-CV | Y-Mea |
| ALL                                   | 8956   | 89.56  | 100.00 | 321    | 9.23    | ###   |
| Apop                                  | 22     | 0.22   | 0.25   | 84.5   | 1.07    | ###   |
| G1                                    | 488    | 4.88   | 5.45   | 156    | 1.16    | ###   |
| G2M                                   | 8029   | 80.29  | 89.65  | 332    | 9.23    | ###   |
| S                                     | 191    | 1.91   | 2.13   | 221    | 0.33    | ###   |

Institution:  
Protocol: 01\_00010606\_476.PRO  
Listmode Replay: New Protocol  
Analysis Date: 03-May-2012, 12:37:05  
Settings File: 00Ciclo Celular de Javi.PRO, 18-Apr-2012, 11:34:20  
Listmode File: 04\_00010609\_479.LMD

Run Date: 02-May-12, 12:48:14  
Sample ID: Well 04  
User ID: anajavi  
Acquisition Time/Events: 98.6s / 10000 (UNKNOWN)  
Instrument SN: AL01002 Software Version: CXP v2.2

(F1)[Ungated] 04\_00010609\_479.LMD : FS Lin/SS Lin - ADC

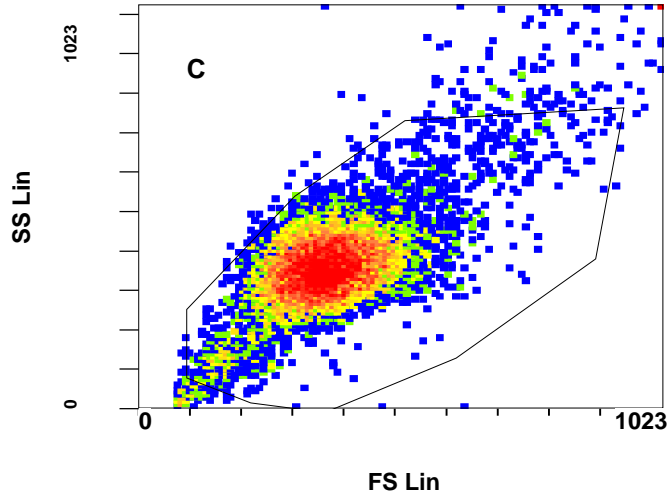

(F1)[Ungated] 04\_00010609\_479.LMD : FL3 Lin/AUX - ADC

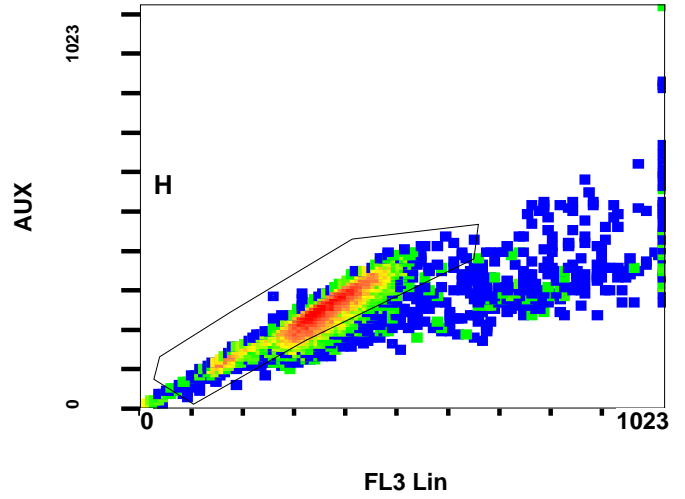

(F1)[H] 04\_00010609\_479.LMD : FL3 Lin - ADC

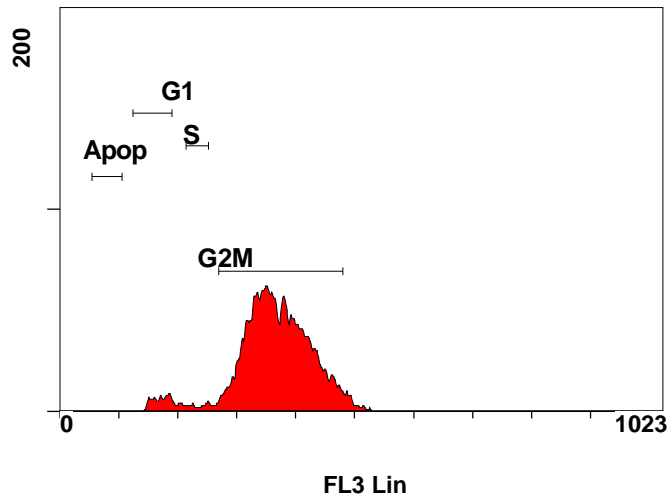

(F1)[H] 04\_00010609\_479.LMD : FL3 Lin/SS Lin - ADC

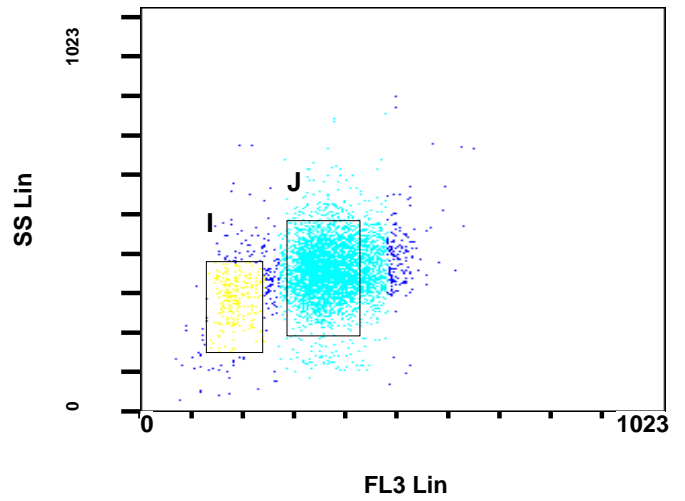



**Statistical Analysis**

**PROGRAM INFORMATION**

| File:- 04_00010609 479.LMD       |        |        |        |        |        |        |
|----------------------------------|--------|--------|--------|--------|--------|--------|
| Gate:- H [H]                     |        |        |        |        |        |        |
| Compensation:- Advanced          |        |        |        |        |        |        |
| Filename:- 04_00010609 479.LMD   |        |        |        |        |        |        |
| Mean Calculation Method:-LOG-LOG |        |        |        |        |        |        |
| Region                           | Number | %Total | %Gated | X-Mean | X-HPCV | Y-Mean |
| ALL                              | 8929   | 89.29  | 100.00 | 360    | 11.93  | ###    |
| ALL                              | 8929   | 89.29  | 100.00 | 360    | 11.93  | 357    |
| Apop                             | 21     | 0.21   | 0.24   | 87.7   | 0.72   | ###    |
| G1                               | 388    | 3.88   | 4.35   | 168    | 1.87   | ###    |
| G2M                              | 7828   | 78.28  | 87.67  | 371    | 11.93  | ###    |
| I                                | 491    | 4.91   | 5.50   | 185    | 0.92   | 287    |
| J                                | 6171   | 61.71  | 69.11  | 360    | 11.95  | 357    |
| S                                | 175    | 1.75   | 1.96   | 233    | 0.26   | ###    |

| File:- 04_00010609 479.LMD       |        |        |        |        |        |        |
|----------------------------------|--------|--------|--------|--------|--------|--------|
| Gate:- Ungated                   |        |        |        |        |        |        |
| Compensation:- Advanced          |        |        |        |        |        |        |
| Filename:- 04_00010609 479.LMD   |        |        |        |        |        |        |
| Mean Calculation Method:-LOG-LOG |        |        |        |        |        |        |
| Region                           | Number | %Total | %Gated | X-Mean | X-HPCV | Y-Mean |
| ALL                              | 10000  | 100.00 | 100.00 | 375    | 7.74   | 363    |
| ALL                              | 10000  | 100.00 | 100.00 | 367    | 11.93  | 244    |
| C                                | 9704   | 97.04  | 97.04  | 372    | 7.74   | 358    |
| H                                | 8929   | 89.29  | 89.29  | 360    | 11.93  | 250    |

Institution:

Run Date: 02-May-12, 12:48:14

Protocol: 01\_00010606 476.PRO

Sample ID: Well 04

Listmode Replay: New Protocol

User ID: anajavi

Analysis Date: 03-May-2012, 12:37:05

Acquisition Time/Events: 98.6s / 10000 (UNKNOWN)

Settings File: 00Ciclo Celular de Javi.PRO, 18-Apr-2012, 11:34:20

Tube ID: NoRead

Listmode File: 04\_00010609 479.LMD

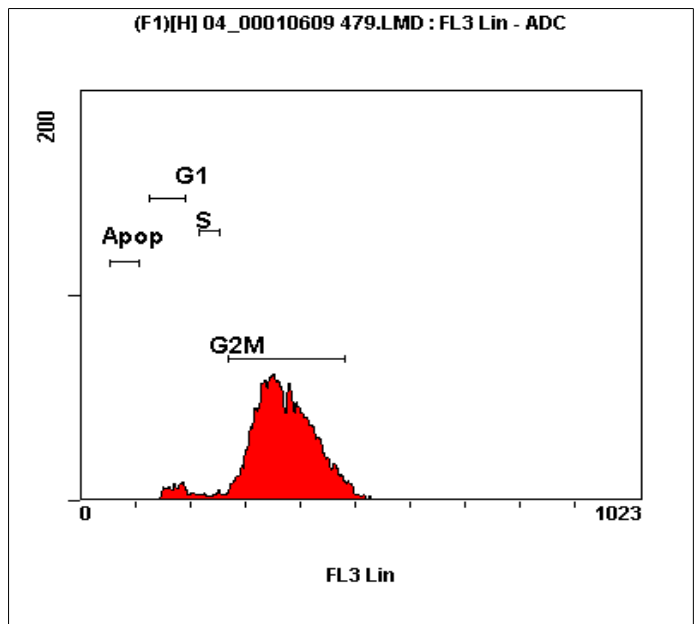

| (F1)[H] 04_00010609 479.LMD : FL3 Lin |        |        |        |        |         |       |
|---------------------------------------|--------|--------|--------|--------|---------|-------|
| Region                                | Number | %Total | %Gated | X-Mean | HP X-CV | Y-Mea |
| ALL                                   | 8929   | 89.29  | 100.00 | 360    | 11.93   | ###   |
| Apop                                  | 21     | 0.21   | 0.24   | 87.7   | 0.72    | ###   |
| G1                                    | 388    | 3.88   | 4.35   | 168    | 1.87    | ###   |
| G2M                                   | 7828   | 78.28  | 87.67  | 371    | 11.93   | ###   |
| S                                     | 175    | 1.75   | 1.96   | 233    | 0.26    | ###   |
